# Supplementary material
Source: PubMed Central journal article supplement (PMC6173328)

## Supporting Information

### Ring expansion of bicyclic methyleneaziridines via concerted, near-barrierless [2,3]-Stevens rearrangements of aziridinium ylides

Steven C. Schmid<sup>1</sup>, Ilia A. Guzei<sup>1</sup>, Israel Fernández<sup>2,\*</sup> and Jennifer M. Schomaker<sup>1,\*</sup>

<sup>1</sup>Department of Chemistry, University of Wisconsin, Madison, Wisconsin 53706, United States

<sup>2</sup>Departamento de Química Orgánica I and Centro de Innovación en Química Avanzada (ORFEO-CINQA), Facultad de Ciencias Químicas, Universidad Complutense de Madrid, 28040, Madrid, Spain

Corresponding Authors [\\*schomakerj@chem.wisc.edu](mailto:*schomakerj@chem.wisc.edu), [\\*israel@quim.ucm.es](mailto:*israel@quim.ucm.es)

|                                                                          |     |
|--------------------------------------------------------------------------|-----|
| <b>Table of Contents</b> .....                                           | S1  |
| <b>I. General information</b> .....                                      | S2  |
| <b>II. Substrate synthesis</b> .....                                     | S3  |
| <b>III. General procedure for azetidine synthesis</b> .....              | S3  |
| <b>IV. Bicyclic Aziridine Experiments</b> .....                          | S6  |
| <b>V. Preparation of enantioenriched substrates and azetidines</b> ..... | S7  |
| <b>VI. Computational methods</b> .....                                   | S11 |
| <b>VII. Ring strain calculations</b> .....                               | S32 |
| <b>VIII. Crystallographic experimental section</b> .....                 | S36 |
| <b>XI. References</b> .....                                              | S44 |
| <b>X. NMR Spectra</b> .....                                              | S47 |

## I. General Information

All glassware was either oven-dried overnight at 130 °C or flame-dried under a stream of dry nitrogen prior to use. Unless otherwise specified, reagents were used as obtained from the vendor without further purification. Tetrahydrofuran, deuterated tetrahydrofuran, and toluene were vacuum transferred from purple Na/benzophenone ketyl. Dichloromethane and acetonitrile were dried over CaH<sub>2</sub> and freshly distilled prior to use. All other solvents were purified in accordance with "Purification of Laboratory Chemicals".<sup>1a</sup> Air- and moisture-sensitive reactions were performed either in an MBraun LabStar glovebox under an atmosphere of nitrogen or using standard Schlenk techniques under an atmosphere of nitrogen. Analytical thin layer chromatography (TLC) was performed utilizing pre-coated silica gel 60 F<sub>254</sub> plates containing a fluorescent indicator, while preparative chromatography was performed using SilicaFlash P60 silica gel (230-400 mesh) via Still's method.<sup>1b</sup> The mobile phases for column chromatography varied depending on substrate as hexanes/ether, hexanes/ethyl acetate, or benzene/ethyl acetate were used. Columns were typically run using a gradient method, beginning with 100% of the less polar eluent and gradually increasing the polarity with the other solvent. For reactions producing products without a UV signature, ceric ammonium molybdate was employed to visualize the reaction products.

<sup>1</sup>H NMR and <sup>13</sup>C NMR spectra were obtained using Bruker-300, Varian Inova-500, Varian Unity-500 or Varian Inova-600 NMR spectrometers. For <sup>1</sup>H NMR, chemical shifts are reported relative to residual protiated solvent peaks ( $\delta$  7.26, 2.49, 7.15 and 4.80 ppm for CDCl<sub>3</sub>, (CD<sub>3</sub>)<sub>2</sub>SO, C<sub>6</sub>D<sub>6</sub> and CD<sub>3</sub>OD respectively). <sup>13</sup>C NMR spectra were measured at either 125 MHz or 150 MHz on the same instruments noted above for recording <sup>1</sup>H NMR spectra. Chemical shifts were again reported in accordance to residual protiated solvent peaks ( $\delta$  77.1, 39.5, 128.0 and 49.0 ppm for CDCl<sub>3</sub>, (CD<sub>3</sub>)<sub>2</sub>SO, C<sub>6</sub>D<sub>6</sub>, and CD<sub>3</sub>OD, respectively). Accurate mass measurements were acquired at the University of Wisconsin, Madison using a Micromass LCT (electrospray ionization, time-of-flight analyzer or electron impact methods). The NMR and Mass Spectrometry facilities are funded by the NSF (CHE-9974839, CHE-9304546, CHE-9208463, CHE-9629688) and the University of Wisconsin, as well as the NIH (RR08389-01).

## II. Preparation of Substrates

Diazo compounds (**2a-d**) and homoallenic carbamate precursors to **1a-b** were synthesized according to the reported literature procedures.<sup>2</sup> The methylene aziridines **1-b** were prepared as previously described; the NMR data is given below for convenience.<sup>2</sup>

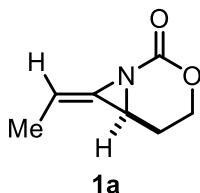

Following the general literature procedure<sup>2</sup> (2.5 mmol scale), compound **1a** was isolated as a clear oil (30%, >19:1 *E/Z*). <sup>1</sup>H NMR (500 MHz, CDCl<sub>3</sub>) δ 5.56 (q, *J* = 7.0 Hz, 1H), 4.54 (ddd, *J* = 11.8, 10.8, 2.1 Hz, 1H), 4.37 (ddd, *J* = 10.8, 3.9, 2.5 Hz, 1H), 3.43 (dd, *J* = 7.6, 6.1 Hz, 1H), 2.37 (ddt, *J* = 14.5, 6.2, 2.3 Hz, 1H), 1.80 (d, *J* = 7.0 Hz, 3H), 1.63 (dddd, *J* = 14.5, 12.2, 8.6, 3.9, 1H). <sup>13</sup>C NMR (126 MHz, CDCl<sub>3</sub>) δ 156.4, 126.1, 98.0, 69.0, 39.4, 24.1, 13.4.

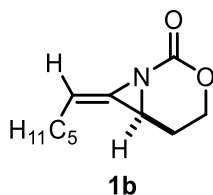

Following the general literature procedure<sup>2</sup> (10 mmol scale), compound **1b** was isolated as a clear oil (51%, >19:1 *E/Z*). <sup>1</sup>H NMR (500 MHz, CDCl<sub>3</sub>) δ 5.58 (t, *J* = 7.0 Hz, 1H), 4.55 (ddd, *J* = 12.0, 10.9, 2.1 Hz, 1H), 4.37 (ddd, *J* = 10.8, 3.9, 2.6 Hz, 1H), 3.43 (dd, *J* = 8.5, 6.3 Hz, 1H), 2.37 (ddt, *J* = 14.6, 6.2, 2.4 Hz, 1H), 2.16 (m, 2H), 1.62 (dddd, *J* = 14.4, 12.2, 8.4, 3.9 Hz, 1H), 1.44 (m, 2H), 1.30 (m, 4H), 0.89 (t, *J* = 6.8 Hz, 3H). <sup>13</sup>C NMR (126 MHz, CDCl<sub>3</sub>) δ 156.5, 125.5, 103.3, 68.9, 39.5, 31.4, 28.9, 28.3, 24.3, 22.5, 14.1.

The enantioenriched methylene aziridine (*S*)-**1b** was prepared using the literature procedure<sup>2</sup> starting with the (*S*)-1-octyn-3-ol to give the product in 99:1 *er*.

## III. General Procedure for Azetidine Synthesis.

The general procedure has previously been reported, but is indicated here for convenience.<sup>3</sup> Spectroscopic data is also included for the purposes of comparison.

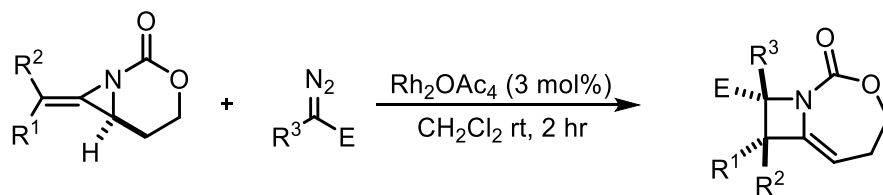

A flame-dried, roundbottom flask was placed under nitrogen and charged with  $\text{Rh}_2\text{OAc}_4$  (0.03 equiv, where the catalyst loading can be decreased upon scale-up), followed by a solution of the methylene aziridine (0.1 mmol, typically 0.1 mM - ~1 mL). To this mixture was added a solution of the diazo compound (1.2-4 equivalents, brought to 0.1 mM in  $\text{CH}_2\text{Cl}_2$ ) dropwise over 2 h using a syringe pump. The conversion was checked by TLC after the addition and once the reaction was completed, the mixture was concentrated and loaded directly onto silica for column chromatography. *Note: The  $R_f$  differences between the aziridine and azetidione can be quite small – we recommend using a 2:1 ether/hexanes eluent for the TLC analysis.*

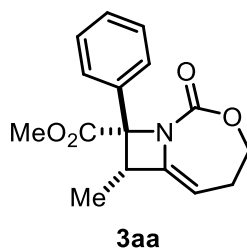

The general procedure was followed to yield compound **3aa** as a white solid (73%, >19:1 *dr*) after column chromatography (0 to 12.5% EtOAc/benzene, 2.5% increments).  $^1\text{H}$  NMR (500 MHz,  $\text{CDCl}_3$ )  $\delta$  7.48 (m, 2H), 7.36 (m, 2H), 7.32 (m, 1H), 4.89 (dt,  $J = 5.2, 2.4$  Hz, 1H), 4.43 (m, 2H), 3.80 (s, 3H), 3.49 (m, 1H), 2.66 (m, 1H), 2.33 (m, 1H), 1.33 (d,  $J = 7.2$  Hz, 3H).  $^{13}\text{C}$  NMR (126 MHz,  $\text{CDCl}_3$ )  $\delta$  168.8, 156.5, 143.6, 138.9, 128.2, 128.1, 126.6, 99.6, 76.1, 68.2, 52.8, 46.1, 28.3, 13.5. HRMS (ESI)  $m/z$  calculated for  $\text{C}_{16}\text{H}_{17}\text{NO}_4[\text{M}+\text{Na}]^+$  310.1050, found 310.1048.

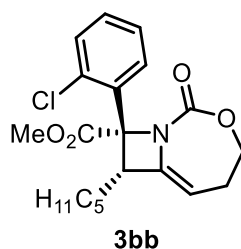

Following the general procedure, column chromatography (0 to 10% EtOAc/benzene, 2% increments) yielded compound **3bb** as an off-white solid (84%, >19:1 *dr*). <sup>1</sup>H NMR (500 MHz, CDCl<sub>3</sub>) δ 7.40 (m, 2H), 7.27 (m, 2H), 4.99 (d, *J* = 6.3 Hz, 1H), 4.46 (m, 2H), 3.77 (s, 3H), 3.18 (m, 1H), 2.71 (m, 1H), 2.32 (m, 1H), 2.01 (m, 2H), 1.47 (m, 1H), 1.33 (m, 5H), 0.90 (m, 3H). <sup>13</sup>C NMR (126 MHz, CDCl<sub>3</sub>) δ 167.3, 156.8, 144.0, 137.0, 132.9, 130.5, 129.3, 127.9, 126.8, 100.0, 75.2, 68.2, 52.8, 50.5, 31.8, 30.7, 28.5, 28.4, 22.7, 14.1. HRMS (ESI) *m/z* calculated for C<sub>20</sub>H<sub>24</sub>ClNO<sub>4</sub>[M+H]<sup>+</sup> 378.1467, found 378.1463.

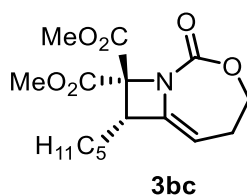

In contrast to the general procedure, the phenyl iodonium ylide was used for this reaction. The ylide was added in two portions (4.0 equiv) to a solution of the methylene aziridine and the rhodium catalyst. The reaction was stirred until consumption of the starting material was noted by TLC. The crude mixture was concentrated and purified by column chromatography (0 to 10% EtOAc/benzene, 2.5% increments) to deliver compound **3bc** as a clear oil (44%). <sup>1</sup>H NMR (500 MHz, CDCl<sub>3</sub>) δ 4.91 (m, 1H), 4.41 (m, 2H), 3.85 (s, 3H), 3.85 (s, 3H), 3.49 (m, 1H), 2.47 (m, 2H), 1.70 (m, 1H), 1.54 (m, 1H), 1.40 (m, 1H), 1.30 (m, 5H), 0.89 (m, 3H). <sup>13</sup>C NMR (126 MHz, CDCl<sub>3</sub>) δ 168.1, 165.9, 155.2, 142.1, 100.6, 72.5, 68.1, 53.5, 53.1, 47.2, 31.7, 29.0, 28.2, 26.7, 22.5, 14.1. HRMS (ESI) *m/z* calculated for C<sub>16</sub>H<sub>23</sub>NO<sub>6</sub>[M+H]<sup>+</sup> 326.1598, found 326.1593.

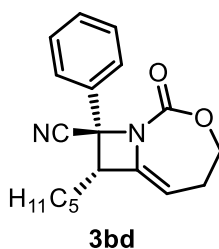

Following the general procedure at 0.05 mmol scale with 2 equiv of diazonitrile (used and kept as a 0.1 M stock solution), column chromatography (0 to 10% EtOAc/benzene, 2.5% increments) yielded compound **3bd** as a clear oil (12.1 mg, 78%, 18:1 *dr*, 99:1 *er*). <sup>1</sup>H NMR (500 MHz, CDCl<sub>3</sub>) δ 7.40-7.46 (m, 5H), 5.03 (ddd, *J* = 5.2, 3.0, 1.8 Hz, 1H), 4.50 (m, 2H), 3.66 (m,

1H), 2.67 (m, 1H), 2.44 (m, 1H), 1.00-1.23 (m, 8H), 0.77 (t,  $J = 7.1$  Hz, 3H).  $^{13}\text{C}$  NMR (126 MHz,  $\text{CDCl}_3$ )  $\delta$  153.7, 141.3, 131.0, 129.6, 128.8, 126.1, 118.4, 102.3, 68.1, 64.2, 51.5, 31.3, 29.1, 28.3, 26.1, 22.2, 13.8. HRMS (ESI)  $m/z$  calculated for  $\text{C}_{19}\text{H}_{22}\text{N}_2\text{O}_2[\text{M}+\text{H}]^+$  311.1754, found 311.1748.

#### IV. Bicyclic Aziridine Experiments.

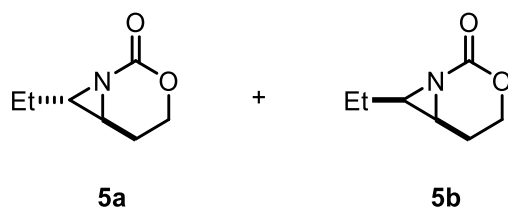

Bicyclic aziridines **5a** and **5b** were synthesized according to the literature procedure.<sup>2</sup>

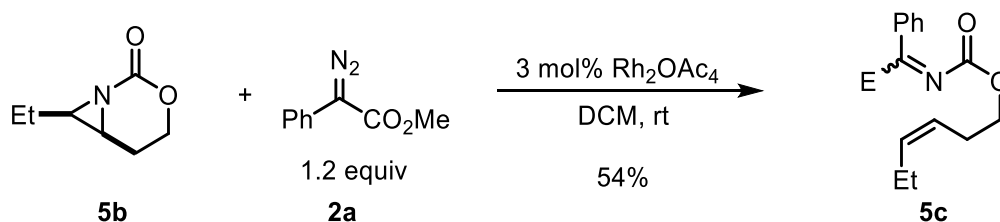

Following the same general procedure as with the methyleneaziridines, column chromatography (0 to 10% EtOAc/hexanes, 2% increments) yielded **5c** as a clear oil (15.5 mg, 54%) as a single stereoisomer at the imine and alkene – *comparison of alkene peaks to the corresponding homoallylic alcohol showed that the cis olefin was formed, the stereochemistry at the imine is unknown*.  $^1\text{H}$  NMR (500 MHz,  $\text{CDCl}_3$ )  $\delta$  7.88 (d,  $J = 7.1$  ppm, 2H), 7.56 (m, 1H), 7.46 (t,  $J = 7.8$  Hz, 2H), 5.53 (m, 1H), 5.36 (m, 1H), 4.24 (t,  $J = 7.1$  ppm, 2H), 3.94 (s, 3H), 2.48 (q,  $J = 7.4$  Hz, 2H), 2.07 (app pentet,  $J = 7.5$  Hz, 2H), 0.98 (t,  $J = 7.5$  Hz, 3H).  $^{13}\text{C}$  NMR (126 MHz,  $\text{CDCl}_3$ )  $\delta$  163.1, 162.9, 161.8, 135.0, 133.2, 132.0, 129.3, 128.7, 123.1, 66.7, 53.1, 26.7, 20.7, 14.2. HRMS (ESI)  $m/z$  calculated for  $\text{C}_{16}\text{H}_{19}\text{NO}_4[\text{M}+\text{H}]^+$  290.1387, found 290.1381.

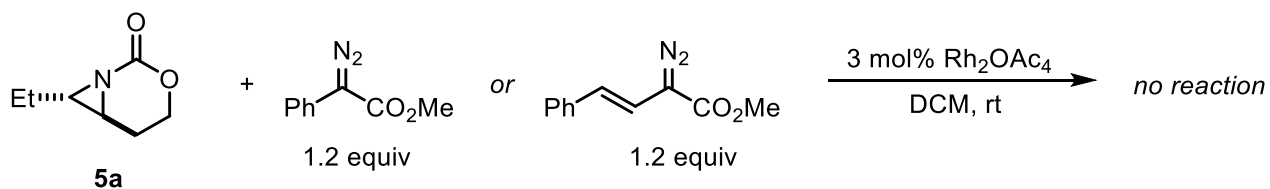

## V. Preparation of enantioenriched substrates and azetidines.

Enantioenriched methylene aziridine **1b** was synthesized as described,<sup>2</sup> starting from the enantioenriched propargyl alcohol. HPLC conditions - chromatograms were acquired on a Shimadzu Prominence HPLC equipped with a Chiracel OJ-H column. Flow rate: 1.00 mL/min.; Oven temp: 40.0 °C; Solvent: 5:95 *i*PrOH:hexane and increasing to 30:70 *i*PrOH:hexane over 10 minutes. The eluent composition was held at this composition for another 20 minutes to complete the analysis. This method of analysis was used for both substrates.isocratic 1.00%

*i*PrOH in hexanes; Detector: UV @ 220 nm:\

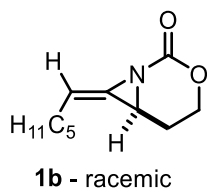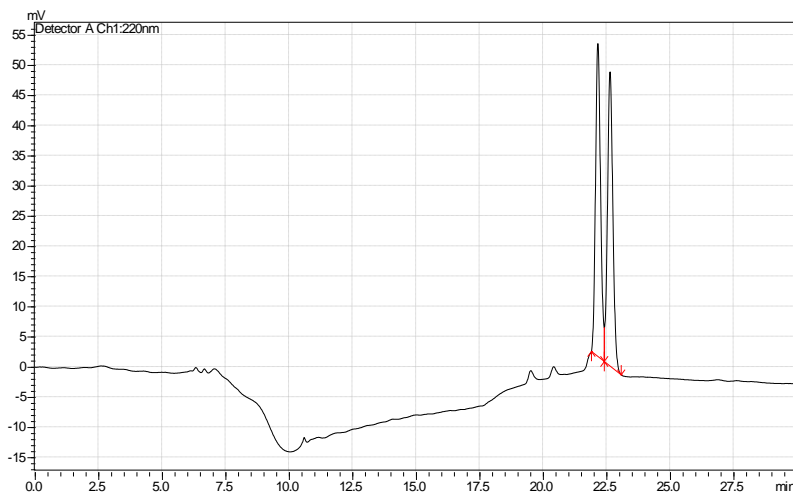

| Peak# | Ret. Time | Area   | Height | Peak Start | Peak End | Area%   |
|-------|-----------|--------|--------|------------|----------|---------|
| 1     | 22.142    | 717567 | 51807  | 21.892     | 22.4     | 50.1029 |
| 2     | 22.621    | 714620 | 48750  | 22.4       | 23.067   | 49.8971 |

**Figure S1.** Chiral HPLC of racemic **1b**.

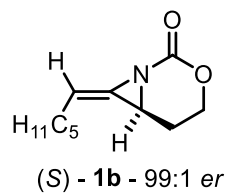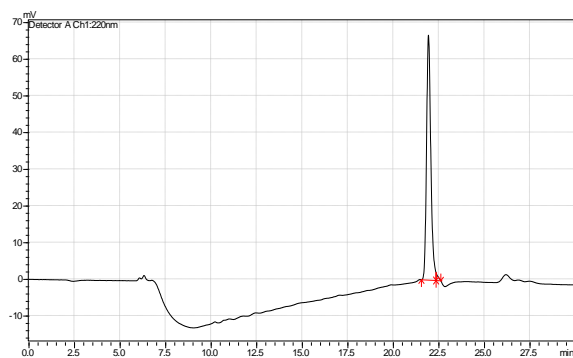

| Peak# | Ret. Time | Area    | Height | Peak Start | Peak End | Area%   |
|-------|-----------|---------|--------|------------|----------|---------|
| 1     | 21.922    | 1092588 | 66792  | 21.542     | 22.342   | 98.6571 |
| 2     | 22.35     | 14872   | 2066   | 22.342     | 22.608   | 1.3429  |

**Figure S2.** Chiral HPLC of enantioenriched (S)-**1b**.

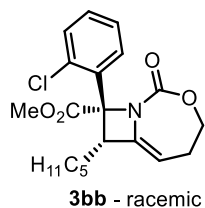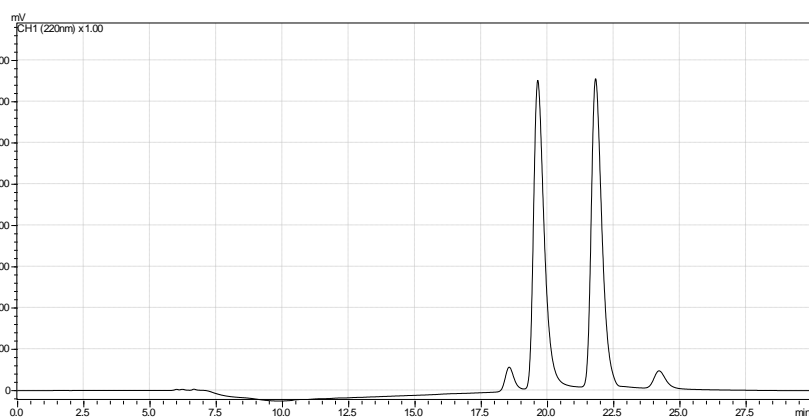

| Peak# | Ret. Time | Area     | Height | Peak Start | Peak End | Area%   |
|-------|-----------|----------|--------|------------|----------|---------|
| 1     | 19.631    | 23402904 | 764917 | 19.117     | 21.250   | 49.0291 |
| 2     | 21.813    | 24329780 | 766403 | 21.250     | 24.210   | 50.9709 |

**Figure S3.** Chiral HPLC of racemic **3bb**.



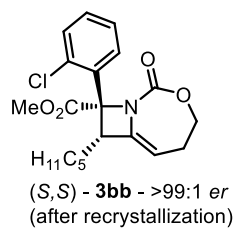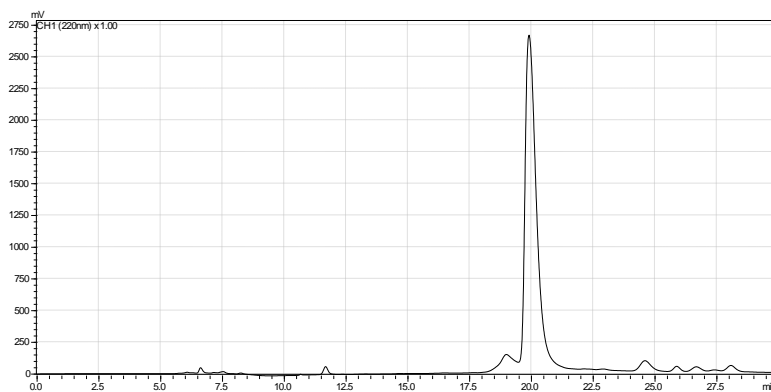

| Peak# | Ret. Time | Area     | Height  | Peak Start | Peak End | Area%   |
|-------|-----------|----------|---------|------------|----------|---------|
| 1     | 19.896    | 89149438 | 2671601 | 19.467     | 22.124   | 99.9462 |
| 2     | 22.124    | 300072   | 12579   | 21.925     | 23.358   | 0.0538  |

**Figure S4.** Chiral HPLC of enantioenriched (*S,S*)-**3bb**.

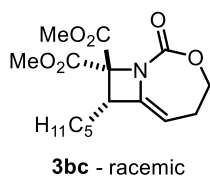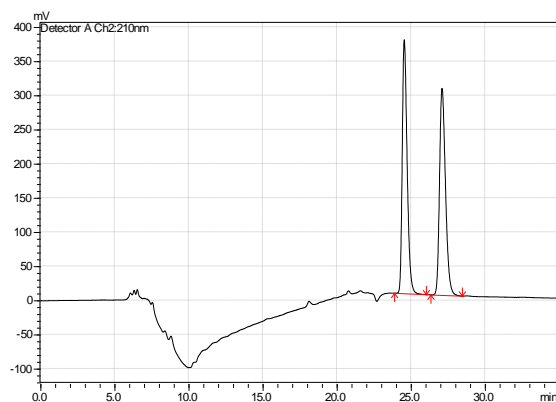

| Peak# | Ret. Time | Area     | Height | Peak Start | Peak End | Area%   |
|-------|-----------|----------|--------|------------|----------|---------|
| 1     | 24.522    | 11286864 | 490386 | 23.900     | 26.317   | 50.0890 |
| 2     | 27.074    | 11246732 | 399632 | 26.358     | 28.458   | 49.9110 |

**Figure S5.** Chiral HPLC of racemic **3bc**.

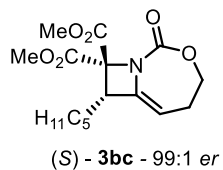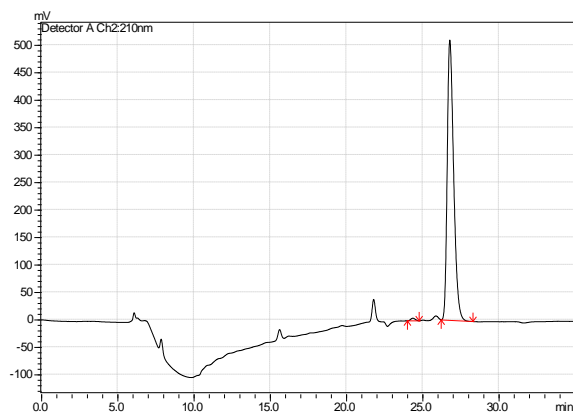

| Peak# | Ret. Time. | Area     | Height | Peak Start | Peak End | Area%   |
|-------|------------|----------|--------|------------|----------|---------|
| 1     | 24.343     | 135432   | 6530   | 23.717     | 24.775   | 0.6797  |
| 2     | 26.764     | 19789846 | 673297 | 26.192     | 28.483   | 99.3203 |

**Figure S6.** Chiral HPLC of enantioenriched (S)-**3bc**.

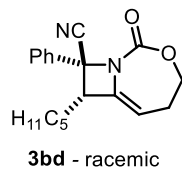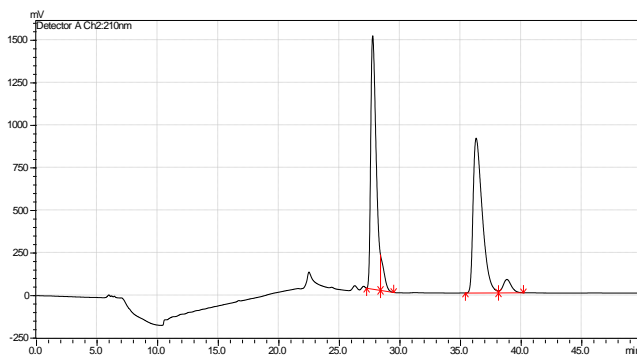

| Peak # | Ret. Time | Area     | Height  | Peak Start | Peak End | Area%   |
|--------|-----------|----------|---------|------------|----------|---------|
| 1      | 27.742    | 40033013 | 1277911 | 27.242     | 28.392   | 45.3596 |
| 2      | 28.400    | 3577494  | 179964  | 28.392     | 29.500   | 4.0535  |
| 3      | 36.280    | 41251230 | 782678  | 35.400     | 38.117   | 46.7399 |
| 4      | 38.814    | 3395312  | 71033   | 38.117     | 40.433   | 3.8471  |

Peaks 2 and 4 are likely the minor diastereomer observed.

**Figure S7.** Chiral HPLC of racemic **3bd**.

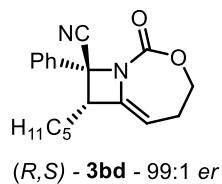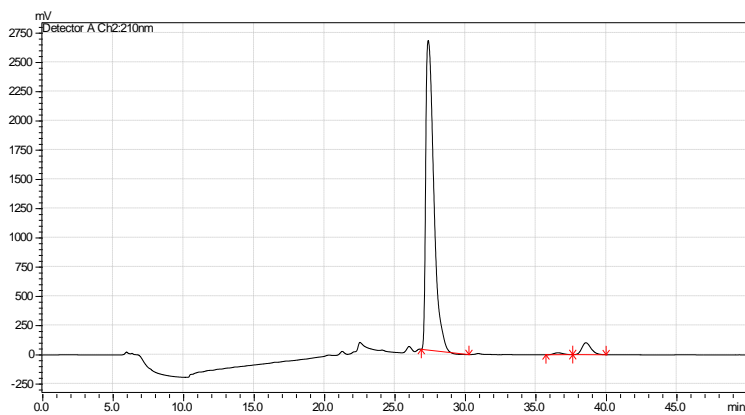

| Peak # | Ret. Time | Area   | Height  | Peak Start | Peak End | Area%   |
|--------|-----------|--------|---------|------------|----------|---------|
| 1      | 27.346    | 933505 | 2440058 | 26.858     | 30.358   | 94.9912 |
| 2      | 36.550    | 694088 | 14590   | 35.700     | 37.592   | 0.7063  |
| 3      | 38.539    | 422822 | 91440   | 37.592     | 40.233   | 4.3025  |

**Figure S8.** Chiral HPLC of enantioenriched (*R,S*)-**3bd**.

## VI. Computational Studies.

### Computational details.

All the calculations reported in this paper were performed with the Gaussian 09 suite of programs.<sup>4</sup> Electron correlation was partially taken into account using the hybrid functional usually denoted as B3LYP<sup>5</sup> in conjunction with the D3 dispersion correction suggested by Grimme et al.<sup>6</sup> using the standard double- $\zeta$  quality def2-SVP<sup>7</sup> basis set for all atoms. The SMD continuum model was used to model the effects of the solvent (CH<sub>2</sub>Cl<sub>2</sub>). This level is denoted SMD(CH<sub>2</sub>Cl<sub>2</sub>)-B3LYP-D3/def2-SVP. Geometries were fully optimized in solution without any geometry or symmetry constraints. Reactants, intermediates, and products were characterized by frequency calculations,<sup>8</sup> and have positive definite Hessian matrices. Transition structures (TS's) show only one negative eigenvalue in their diagonalized force constant matrices, and their

associated eigenvectors were confirmed to correspond to the motion along the reaction coordinate under consideration using the Intrinsic Reaction Coordinate (IRC) method.<sup>9</sup> Frequency calculations were also used to determine the difference between the potential (E) and Gibbs (G) energies,  $G - E$ , which contains the zero-point, thermal, and entropy energies. Potential energies were refined,  $E_{\text{sol}}$ , by means of single point (SP) calculations at the same level with a larger basis set, def2-TZVPP,<sup>7</sup> where all elements were described with a triple- $\zeta$  + polarization quality basis set. This level is denoted SMD(CH<sub>2</sub>Cl<sub>2</sub>)-B3LYP-D3/def2-TZVPP//SMD(CH<sub>2</sub>Cl<sub>2</sub>)-B3LYP-D3/def2-SVP. The  $\Delta G$  and  $\Delta G^\ddagger$  values given in the text were obtained from the Gibbs energy in solution,  $G_{\text{sol}}$ , which was calculated by adding the thermochemistry corrections,  $G - E$ , to the refined SP energies,  $E_{\text{sol}}$ , i.e.,  $G_{\text{sol}} = E_{\text{sol}} + G - E$ . Cartesian coordinates (in Å) and energies (in a.u.) of all the stationary points discussed in the text are given below. All calculations were performed at the SCM(dichloromethane)-B3LYP- D3/def2-SVP level.

**Compound 1a**

|                                              |              |              |              |
|----------------------------------------------|--------------|--------------|--------------|
| Sum of electronic and zero-point Energies=   |              |              | -476.823207  |
| Sum of electronic and thermal Energies=      |              |              | -476.814066  |
| Sum of electronic and thermal Enthalpies=    |              |              | -476.813122  |
| Sum of electronic and thermal Free Energies= |              |              | -476.857914  |
| C                                            | -0.265268000 | 0.744952000  | 1.126063000  |
| N                                            | 0.325089000  | -0.627475000 | 0.924022000  |
| C                                            | 1.402222000  | -0.846608000 | 0.024351000  |
| O                                            | 1.882458000  | 0.219059000  | -0.641506000 |
| C                                            | 1.014828000  | 1.344806000  | -0.914204000 |
| H                                            | 0.250705000  | 1.023694000  | -1.640999000 |
| H                                            | 1.654820000  | 2.096030000  | -1.393881000 |
| C                                            | 0.379672000  | 1.876826000  | 0.358345000  |
| H                                            | -0.360750000 | 2.652836000  | 0.106811000  |
| H                                            | 1.151116000  | 2.341663000  | 0.993082000  |
| O                                            | 1.909470000  | -1.929807000 | -0.102198000 |
| C                                            | -0.976789000 | -0.334068000 | 0.458162000  |
| C                                            | -1.980314000 | -0.856550000 | -0.236519000 |
| H                                            | -1.860583000 | -1.879343000 | -0.612835000 |
| C                                            | -3.263200000 | -0.136384000 | -0.532637000 |
| H                                            | -4.129817000 | -0.687455000 | -0.126572000 |
| H                                            | -3.272061000 | 0.878781000  | -0.106382000 |
| H                                            | -3.428719000 | -0.052527000 | -1.621242000 |
| H                                            | -0.482671000 | 0.946792000  | 2.182129000  |

**Compound 2a-Rh<sub>2</sub>**

Sum of electronic and zero-point Energies= -1632.164985  
Sum of electronic and thermal Energies= -1632.132471  
Sum of electronic and thermal Enthalpies= -1632.131527  
Sum of electronic and thermal Free Energies= -1632.231461

|    |              |              |              |
|----|--------------|--------------|--------------|
| Rh | 0.008249000  | 0.065877000  | 0.118611000  |
| C  | -1.922217000 | 0.567005000  | 0.308009000  |
| C  | -2.116022000 | 2.026343000  | 0.493777000  |
| O  | -2.032408000 | 2.583361000  | 1.566915000  |
| O  | -2.341297000 | 2.635413000  | -0.671620000 |
| C  | -2.293143000 | 4.069345000  | -0.675523000 |
| H  | -1.299791000 | 4.419937000  | -0.356624000 |
| H  | -2.485036000 | 4.377057000  | -1.710993000 |
| H  | -3.059290000 | 4.491066000  | -0.007434000 |
| C  | -3.083230000 | -0.261636000 | 0.217799000  |
| C  | -2.977063000 | -1.637866000 | -0.137895000 |
| C  | -4.115812000 | -2.426568000 | -0.249501000 |
| C  | -5.380280000 | -1.877120000 | 0.004352000  |
| C  | -5.512859000 | -0.526284000 | 0.362872000  |
| C  | -4.384267000 | 0.275064000  | 0.459301000  |
| H  | -4.495785000 | 1.325288000  | 0.737792000  |
| H  | -6.501879000 | -0.105982000 | 0.559001000  |
| H  | -6.271855000 | -2.504134000 | -0.080303000 |
| H  | -4.025051000 | -3.477167000 | -0.534822000 |
| H  | -1.995072000 | -2.058034000 | -0.338683000 |
| Rh | 2.376849000  | -0.526047000 | -0.234241000 |
| O  | 1.968128000  | -2.317818000 | 0.708455000  |
| C  | 0.804827000  | -2.550867000 | 1.138633000  |
| O  | -0.189822000 | -1.756227000 | 1.052317000  |
| O  | 2.771984000  | 0.341666000  | 1.590606000  |
| C  | 1.825077000  | 0.835426000  | 2.266118000  |
| O  | 0.602863000  | 0.872795000  | 1.910399000  |
| O  | 1.804472000  | -1.358751000 | -2.034699000 |
| C  | 0.591331000  | -1.334964000 | -2.379719000 |
| O  | -0.359399000 | -0.821182000 | -1.702469000 |
| O  | 2.601372000  | 1.312122000  | -1.143232000 |
| C  | 1.618701000  | 2.101919000  | -1.214332000 |
| O  | 0.437635000  | 1.854518000  | -0.805418000 |
| C  | 1.839583000  | 3.469234000  | -1.807231000 |
| H  | 1.847654000  | 4.207744000  | -0.988480000 |
| H  | 2.796830000  | 3.514990000  | -2.342141000 |
| H  | 1.008932000  | 3.726708000  | -2.480248000 |
| C  | 0.213037000  | -1.930692000 | -3.710462000 |
| H  | 0.056499000  | -1.108990000 | -4.429049000 |
| H  | 1.010142000  | -2.585797000 | -4.084961000 |
| H  | -0.733541000 | -2.482963000 | -3.622358000 |
| C  | 2.137773000  | 1.413179000  | 3.621798000  |
| H  | 3.221448000  | 1.504347000  | 3.769331000  |
| H  | 1.650301000  | 2.392804000  | 3.733291000  |
| H  | 1.719407000  | 0.745128000  | 4.392433000  |
| C  | 0.542598000  | -3.862505000 | 1.831091000  |
| H  | 1.399349000  | -4.539972000 | 1.726290000  |
| H  | 0.356074000  | -3.669515000 | 2.899987000  |
| H  | -0.365193000 | -4.326120000 | 1.416762000  |

**TS1**

Sum of electronic and zero-point Energies= -2109.007940  
Sum of electronic and thermal Energies= -2108.965760  
Sum of electronic and thermal Enthalpies= -2108.964816  
Sum of electronic and thermal Free Energies= -2109.084315

|    |              |              |              |
|----|--------------|--------------|--------------|
| Rh | 0.793925000  | 0.095547000  | 0.214943000  |
| C  | -1.008631000 | 0.394823000  | 1.135822000  |
| C  | -1.172131000 | -0.525804000 | 2.298414000  |
| O  | -1.048703000 | -0.119349000 | 3.438064000  |
| O  | -1.324204000 | -1.811205000 | 1.984844000  |
| C  | -1.415120000 | -2.724463000 | 3.079738000  |
| H  | -0.482794000 | -2.726740000 | 3.665146000  |
| H  | -2.256069000 | -2.462381000 | 3.740111000  |
| H  | -1.582129000 | -3.713684000 | 2.634776000  |
| C  | -1.759733000 | 1.635142000  | 1.123650000  |
| C  | -2.821458000 | 1.880502000  | 2.037977000  |
| C  | -3.528158000 | 3.076421000  | 2.006337000  |
| C  | -3.207429000 | 4.062004000  | 1.059302000  |
| C  | -2.179794000 | 3.837497000  | 0.138834000  |
| C  | -1.467978000 | 2.638708000  | 0.164036000  |
| H  | -0.678738000 | 2.464058000  | -0.560758000 |
| H  | -1.934697000 | 4.597720000  | -0.606917000 |
| H  | -3.765120000 | 5.002343000  | 1.040616000  |
| H  | -4.337320000 | 3.247455000  | 2.720772000  |
| H  | -3.090340000 | 1.117332000  | 2.764605000  |
| N  | -2.728766000 | -0.708509000 | -0.235638000 |
| C  | -2.334821000 | -1.199627000 | -1.605212000 |
| C  | -3.087010000 | 0.024838000  | -1.389394000 |
| C  | -3.727727000 | 1.138367000  | -1.724115000 |
| H  | -4.182030000 | 1.720142000  | -0.914978000 |
| C  | -3.843091000 | 1.659005000  | -3.123818000 |
| H  | -3.392298000 | 2.664687000  | -3.195712000 |
| H  | -3.340875000 | 1.003595000  | -3.851636000 |
| H  | -4.899959000 | 1.766736000  | -3.423875000 |
| H  | -1.256367000 | -1.117371000 | -1.752364000 |
| C  | -2.976214000 | -2.490879000 | -2.056898000 |
| C  | -4.334251000 | -2.661681000 | -1.403987000 |
| O  | -4.259069000 | -2.486034000 | 0.033135000  |
| C  | -3.727140000 | -1.367801000 | 0.541619000  |
| O  | -4.051898000 | -0.963508000 | 1.627087000  |
| H  | -5.064567000 | -1.935257000 | -1.796153000 |
| H  | -4.735194000 | -3.672094000 | -1.550631000 |
| H  | -3.088491000 | -2.505625000 | -3.152629000 |
| H  | -2.315330000 | -3.325940000 | -1.775979000 |
| Rh | 3.030583000  | -0.181862000 | -0.807688000 |
| O  | 3.697420000  | -0.751958000 | 1.063329000  |
| C  | 2.877359000  | -0.854324000 | 2.019478000  |
| O  | 1.629426000  | -0.612111000 | 1.956339000  |
| O  | 3.383025000  | 1.795823000  | -0.334049000 |
| C  | 2.522517000  | 2.447619000  | 0.320839000  |
| O  | 1.396734000  | 1.999977000  | 0.713850000  |
| O  | 2.507395000  | -2.137816000 | -1.207599000 |
| C  | 1.348826000  | -2.544333000 | -0.908774000 |
| O  | 0.431679000  | -1.845512000 | -0.371362000 |
| O  | 2.184840000  | 0.402827000  | -2.603225000 |
| C  | 0.971408000  | 0.743452000  | -2.638914000 |
| O  | 0.175491000  | 0.753339000  | -1.642794000 |
| C  | 2.839566000  | 3.870490000  | 0.703049000  |
| H  | 3.050689000  | 3.905611000  | 1.784529000  |
| H  | 3.714742000  | 4.238642000  | 0.152516000  |
| H  | 1.966129000  | 4.511887000  | 0.514732000  |
| C  | 3.419564000  | -1.252775000 | 3.368243000  |
| H  | 4.248768000  | -1.964379000 | 3.253610000  |
| H  | 3.812542000  | -0.346626000 | 3.860025000  |
| H  | 2.627425000  | -1.672963000 | 4.001628000  |
| C  | 0.375013000  | 1.144116000  | -3.963686000 |
| H  | 1.159983000  | 1.410242000  | -4.683299000 |
| H  | -0.196944000 | 0.288900000  | -4.361138000 |
| H  | -0.326172000 | 1.979752000  | -3.827797000 |

|   |              |              |              |
|---|--------------|--------------|--------------|
| C | 1.021953000  | -3.991619000 | -1.175213000 |
| H | 1.563468000  | -4.352420000 | -2.060341000 |
| H | 1.351003000  | -4.585524000 | -0.305972000 |
| H | -0.061041000 | -4.128242000 | -1.294813000 |

**TS1-iso**

|                                              |              |
|----------------------------------------------|--------------|
| Sum of electronic and zero-point Energies=   | -2109.002511 |
| Sum of electronic and thermal Energies=      | -2108.960323 |
| Sum of electronic and thermal Enthalpies=    | -2108.959378 |
| Sum of electronic and thermal Free Energies= | -2109.078677 |

|    |              |              |              |
|----|--------------|--------------|--------------|
| Rh | -0.750706000 | 0.182199000  | 0.055454000  |
| C  | 1.042772000  | 0.946447000  | 0.687885000  |
| C  | 1.209343000  | 0.735692000  | 2.160968000  |
| O  | 1.567609000  | -0.270593000 | 2.723582000  |
| O  | 0.769440000  | 1.832380000  | 2.809569000  |
| C  | 0.561814000  | 1.694747000  | 4.218937000  |
| H  | -0.088988000 | 0.834134000  | 4.431932000  |
| H  | 1.520682000  | 1.560069000  | 4.743721000  |
| H  | 0.080293000  | 2.623826000  | 4.549858000  |
| C  | 1.762104000  | 2.016456000  | 0.029940000  |
| C  | 1.602607000  | 2.228295000  | -1.365118000 |
| C  | 2.282191000  | 3.253746000  | -2.014076000 |
| C  | 3.125816000  | 4.106965000  | -1.289378000 |
| C  | 3.299368000  | 3.919487000  | 0.087512000  |
| C  | 2.640624000  | 2.880866000  | 0.738194000  |
| H  | 2.799251000  | 2.735395000  | 1.804867000  |
| H  | 3.962905000  | 4.579355000  | 0.651640000  |
| H  | 3.652630000  | 4.917718000  | -1.799924000 |
| H  | 2.152800000  | 3.396752000  | -3.089796000 |
| H  | 0.951083000  | 1.561470000  | -1.925416000 |
| N  | 2.764430000  | -0.746040000 | 0.115152000  |
| C  | 2.408871000  | -1.727669000 | -0.973042000 |
| C  | 2.731794000  | -2.139449000 | 0.382073000  |
| C  | 3.000675000  | -2.998395000 | 1.355418000  |
| H  | 3.300054000  | -2.578477000 | 2.321238000  |
| C  | 2.891074000  | -4.486882000 | 1.219332000  |
| H  | 2.181103000  | -4.898548000 | 1.957583000  |
| H  | 2.553515000  | -4.784764000 | 0.214661000  |
| H  | 3.862491000  | -4.975064000 | 1.413506000  |
| H  | 1.350419000  | -1.647946000 | -1.229246000 |
| C  | 3.363240000  | -1.812183000 | -2.139631000 |
| C  | 4.776038000  | -1.482562000 | -1.696979000 |
| O  | 4.823545000  | -0.250468000 | -0.935336000 |
| C  | 4.036533000  | -0.105202000 | 0.141535000  |
| O  | 4.371489000  | 0.585042000  | 1.067293000  |
| H  | 5.197378000  | -2.285015000 | -1.069369000 |
| H  | 5.445328000  | -1.320951000 | -2.551075000 |
| H  | 3.342125000  | -2.817721000 | -2.589063000 |
| H  | 3.029913000  | -1.095062000 | -2.906823000 |
| Rh | -2.994868000 | -0.604543000 | -0.621015000 |
| O  | -3.413712000 | 1.345439000  | -1.146374000 |
| C  | -2.537221000 | 2.242478000  | -0.989665000 |
| O  | -1.365323000 | 2.061768000  | -0.525702000 |
| O  | -3.615682000 | -0.223787000 | 1.308235000  |
| C  | -2.784739000 | 0.207047000  | 2.156238000  |
| O  | -1.561630000 | 0.472348000  | 1.926536000  |
| O  | -2.223700000 | -0.952828000 | -2.502600000 |
| C  | -1.011969000 | -0.698839000 | -2.737892000 |
| O  | -0.182153000 | -0.217025000 | -1.896695000 |
| O  | -2.392705000 | -2.496264000 | -0.036442000 |
| C  | -1.226170000 | -2.668212000 | 0.418913000  |
| O  | -0.345401000 | -1.761145000 | 0.564496000  |
| C  | -3.249854000 | 0.409741000  | 3.575423000  |
| H  | -4.345998000 | 0.409322000  | 3.632041000  |
| H  | -2.857519000 | -0.415057000 | 4.192901000  |
| H  | -2.843236000 | 1.349738000  | 3.975362000  |
| C  | -2.903529000 | 3.660357000  | -1.346094000 |
| H  | -2.028039000 | 4.193511000  | -1.741954000 |
| H  | -3.729186000 | 3.678304000  | -2.069735000 |

|   |              |              |              |
|---|--------------|--------------|--------------|
| H | -3.228562000 | 4.176959000  | -0.427410000 |
| C | -0.809695000 | -4.064332000 | 0.805187000  |
| H | -0.112321000 | -4.449409000 | 0.043749000  |
| H | -0.274150000 | -4.044178000 | 1.764715000  |
| H | -1.680723000 | -4.729506000 | 0.863933000  |
| C | -0.463092000 | -1.019271000 | -4.103894000 |
| H | 0.093483000  | -1.969343000 | -4.039560000 |
| H | -1.274169000 | -1.132980000 | -4.834703000 |
| H | 0.241479000  | -0.239641000 | -4.426671000 |

**TS1'**

|                                              |              |
|----------------------------------------------|--------------|
| Sum of electronic and zero-point Energies=   | -2108.995990 |
| Sum of electronic and thermal Energies=      | -2108.954321 |
| Sum of electronic and thermal Enthalpies=    | -2108.953377 |
| Sum of electronic and thermal Free Energies= | -2109.071323 |

|    |              |              |              |
|----|--------------|--------------|--------------|
| Rh | 0.959139000  | 0.015964000  | -0.025881000 |
| C  | -1.078589000 | 0.425469000  | -0.545134000 |
| C  | -1.459635000 | -0.579348000 | -1.589693000 |
| O  | -1.377071000 | -0.324479000 | -2.775594000 |
| O  | -1.765103000 | -1.793348000 | -1.125810000 |
| C  | -1.941437000 | -2.821788000 | -2.104366000 |
| H  | -1.017551000 | -2.951070000 | -2.686500000 |
| H  | -2.169062000 | -3.736202000 | -1.543052000 |
| H  | -2.777917000 | -2.582278000 | -2.774855000 |
| C  | -1.584039000 | 1.797227000  | -0.719879000 |
| C  | -1.128301000 | 2.821787000  | 0.142926000  |
| C  | -1.608687000 | 4.125613000  | 0.030223000  |
| C  | -2.547444000 | 4.450199000  | -0.956507000 |
| C  | -3.009592000 | 3.453243000  | -1.823960000 |
| C  | -2.544547000 | 2.143743000  | -1.705619000 |
| H  | -2.921994000 | 1.383403000  | -2.386497000 |
| H  | -3.742904000 | 3.696558000  | -2.597380000 |
| H  | -2.915908000 | 5.475265000  | -1.050988000 |
| H  | -1.242072000 | 4.897459000  | 0.712237000  |
| H  | -0.392439000 | 2.575693000  | 0.905855000  |
| N  | -4.235368000 | -0.441869000 | -0.280288000 |
| C  | -4.536753000 | 0.738927000  | 0.614628000  |
| C  | -3.342288000 | -0.082785000 | 0.697542000  |
| C  | -2.163741000 | -0.386617000 | 1.299823000  |
| H  | -1.705210000 | -1.355612000 | 1.110780000  |
| H  | -4.499966000 | 1.690480000  | 0.072919000  |
| C  | -5.659757000 | 0.535172000  | 1.606573000  |
| C  | -5.817165000 | -0.949457000 | 1.898948000  |
| O  | -5.951519000 | -1.723194000 | 0.677614000  |
| C  | -5.028763000 | -1.632132000 | -0.287586000 |
| O  | -4.919511000 | -2.469485000 | -1.138871000 |
| H  | -4.955564000 | -1.345171000 | 2.461600000  |
| H  | -6.729188000 | -1.157921000 | 2.471097000  |
| H  | -5.457271000 | 1.076502000  | 2.544266000  |
| H  | -6.592332000 | 0.935463000  | 1.179014000  |
| Rh | 3.357844000  | -0.426069000 | 0.335345000  |
| O  | 3.742432000  | 1.053577000  | -1.047719000 |
| C  | 2.781339000  | 1.690389000  | -1.568274000 |
| O  | 1.546649000  | 1.487265000  | -1.338373000 |
| O  | 3.261506000  | -1.812426000 | -1.181152000 |
| C  | 2.163595000  | -1.995365000 | -1.781319000 |
| O  | 1.076552000  | -1.387655000 | -1.531736000 |
| O  | 3.333602000  | 0.985912000  | 1.833162000  |
| C  | 2.251885000  | 1.570591000  | 2.115454000  |
| O  | 1.132052000  | 1.358419000  | 1.547778000  |
| O  | 2.790432000  | -1.867434000 | 1.699895000  |
| C  | 1.562997000  | -2.088995000 | 1.906548000  |
| O  | 0.597695000  | -1.495200000 | 1.328770000  |
| C  | 1.206919000  | -3.118266000 | 2.948523000  |
| H  | 1.902341000  | -3.967868000 | 2.894722000  |
| H  | 1.317758000  | -2.655386000 | 3.943562000  |
| H  | 0.170156000  | -3.459185000 | 2.831253000  |
| C  | 2.266822000  | 2.625998000  | 3.190540000  |
| H  | 2.089048000  | 3.607845000  | 2.721891000  |



|   |              |              |              |
|---|--------------|--------------|--------------|
| H | 1.451720000  | 2.446710000  | 3.907145000  |
| H | 3.234067000  | 2.643941000  | 3.708985000  |
| C | 2.116688000  | -3.042613000 | -2.864646000 |
| H | 1.411090000  | -2.744666000 | -3.652096000 |
| H | 3.116871000  | -3.209382000 | -3.286766000 |
| H | 1.760892000  | -3.988193000 | -2.422878000 |
| C | 3.111448000  | 2.813637000  | -2.517382000 |
| H | 2.384973000  | 2.847474000  | -3.341391000 |
| H | 3.042973000  | 3.764941000  | -1.964111000 |
| H | 4.131691000  | 2.704992000  | -2.908989000 |
| C | -1.737662000 | 0.371475000  | 2.522412000  |
| H | -2.070177000 | -0.174673000 | 3.423216000  |
| H | -0.646516000 | 0.456227000  | 2.566352000  |
| H | -2.175682000 | 1.380249000  | 2.554366000  |

**INT1**

|                                              |              |
|----------------------------------------------|--------------|
| Sum of electronic and zero-point Energies=   | -2109.026072 |
| Sum of electronic and thermal Energies=      | -2108.984040 |
| Sum of electronic and thermal Enthalpies=    | -2108.983096 |
| Sum of electronic and thermal Free Energies= | -2109.101594 |

|    |              |              |              |
|----|--------------|--------------|--------------|
| Rh | -0.694981000 | 0.003610000  | -0.149957000 |
| C  | 1.557108000  | 0.292810000  | -0.763933000 |
| C  | 1.481928000  | -0.360991000 | -2.090458000 |
| O  | 1.179458000  | 0.159063000  | -3.143730000 |
| O  | 1.761241000  | -1.694270000 | -2.005110000 |
| C  | 1.634401000  | -2.443036000 | -3.210793000 |
| H  | 0.604105000  | -2.393443000 | -3.595535000 |
| H  | 2.322307000  | -2.067538000 | -3.984947000 |
| H  | 1.888507000  | -3.480899000 | -2.957139000 |
| C  | 1.893363000  | 1.765090000  | -0.718870000 |
| C  | 2.452003000  | 2.454269000  | -1.812504000 |
| C  | 2.761447000  | 3.814747000  | -1.728158000 |
| C  | 2.537944000  | 4.523125000  | -0.542873000 |
| C  | 1.986547000  | 3.853738000  | 0.554326000  |
| C  | 1.658444000  | 2.498918000  | 0.461191000  |
| H  | 1.182980000  | 2.002730000  | 1.305238000  |
| H  | 1.790288000  | 4.393306000  | 1.485490000  |
| H  | 2.785616000  | 5.586346000  | -0.477515000 |
| H  | 3.192357000  | 4.321659000  | -2.596487000 |
| H  | 2.648524000  | 1.919781000  | -2.738982000 |
| N  | 2.576984000  | -0.495652000 | 0.072559000  |
| C  | 2.123620000  | -1.600407000 | 1.073426000  |
| C  | 2.705166000  | -0.373749000 | 1.531630000  |
| C  | 3.270164000  | 0.461771000  | 2.384782000  |
| H  | 3.715881000  | 1.377317000  | 1.985309000  |
| C  | 3.295175000  | 0.238416000  | 3.862321000  |
| H  | 2.749901000  | 1.049910000  | 4.373785000  |
| H  | 2.842653000  | -0.722759000 | 4.147088000  |
| H  | 4.332311000  | 0.269445000  | 4.236319000  |
| H  | 1.037491000  | -1.689681000 | 1.058099000  |
| C  | 2.887889000  | -2.891716000 | 0.993098000  |
| C  | 4.367535000  | -2.619296000 | 0.889325000  |
| O  | 4.649193000  | -1.714619000 | -0.209507000 |
| C  | 3.893202000  | -0.718438000 | -0.623028000 |
| O  | 4.220296000  | 0.003802000  | -1.514734000 |
| H  | 4.762635000  | -2.158362000 | 1.806967000  |
| H  | 4.947191000  | -3.522952000 | 0.664644000  |
| H  | 2.681060000  | -3.480605000 | 1.900687000  |
| H  | 2.522503000  | -3.460618000 | 0.125023000  |
| Rh | -3.030782000 | -0.202827000 | 0.588113000  |
| O  | -3.559749000 | -0.417867000 | -1.385586000 |
| C  | -2.654520000 | -0.397963000 | -2.274215000 |
| O  | -1.413338000 | -0.250924000 | -2.064462000 |
| O  | -3.197819000 | 1.836303000  | 0.411536000  |
| C  | -2.195807000 | 2.503696000  | 0.013494000  |
| O  | -1.065497000 | 2.022489000  | -0.301441000 |
| O  | -2.724461000 | -2.245256000 | 0.710335000  |
| C  | -1.605172000 | -2.731161000 | 0.388004000  |
| O  | -0.588748000 | -2.059132000 | 0.017209000  |

|   |              |              |              |
|---|--------------|--------------|--------------|
| O | -2.345835000 | 0.030399000  | 2.526656000  |
| C | -1.111679000 | 0.195693000  | 2.737956000  |
| O | -0.206765000 | 0.223625000  | 1.843838000  |
| C | -2.336277000 | 4.003218000  | -0.052830000 |
| H | -1.642298000 | 4.423693000  | -0.792830000 |
| H | -3.372396000 | 4.285853000  | -0.284409000 |
| H | -2.077684000 | 4.418303000  | 0.935979000  |
| C | -3.099025000 | -0.557342000 | -3.706574000 |
| H | -2.237517000 | -0.576401000 | -4.385739000 |
| H | -3.683919000 | -1.484563000 | -3.808629000 |
| H | -3.761673000 | 0.281896000  | -3.971497000 |
| C | -0.645610000 | 0.392590000  | 4.158362000  |
| H | -1.464516000 | 0.230442000  | 4.870529000  |
| H | 0.186829000  | -0.294351000 | 4.371831000  |
| H | -0.262351000 | 1.419969000  | 4.267738000  |
| C | -1.446371000 | -4.230151000 | 0.407075000  |
| H | -2.250185000 | -4.704191000 | 0.985139000  |
| H | -1.489406000 | -4.596908000 | -0.631888000 |
| H | -0.463426000 | -4.504928000 | 0.816254000  |

**INT1-iso**

|                                              |              |
|----------------------------------------------|--------------|
| Sum of electronic and zero-point Energies=   | -2109.029771 |
| Sum of electronic and thermal Energies=      | -2108.987939 |
| Sum of electronic and thermal Enthalpies=    | -2108.986995 |
| Sum of electronic and thermal Free Energies= | -2109.103835 |

|    |              |              |              |
|----|--------------|--------------|--------------|
| Rh | -0.612800000 | -0.028016000 | 0.038511000  |
| C  | 1.609978000  | 0.453411000  | 0.613077000  |
| C  | 1.543927000  | 0.278361000  | 2.091606000  |
| O  | 1.989011000  | -0.682596000 | 2.696298000  |
| O  | 0.878413000  | 1.255801000  | 2.726371000  |
| C  | 0.602890000  | 1.040697000  | 4.108815000  |
| H  | 0.090523000  | 0.080159000  | 4.256117000  |
| H  | 1.529998000  | 1.050285000  | 4.704230000  |
| H  | -0.048751000 | 1.867668000  | 4.420936000  |
| C  | 1.888907000  | 1.799285000  | -0.005908000 |
| C  | 2.199635000  | 1.890234000  | -1.380432000 |
| C  | 2.474406000  | 3.113157000  | -1.997714000 |
| C  | 2.441060000  | 4.301581000  | -1.263961000 |
| C  | 2.128308000  | 4.235261000  | 0.097625000  |
| C  | 1.860509000  | 3.011564000  | 0.715057000  |
| H  | 1.621156000  | 2.997525000  | 1.773846000  |
| H  | 2.097376000  | 5.150019000  | 0.696893000  |
| H  | 2.652980000  | 5.260904000  | -1.743567000 |
| H  | 2.706266000  | 3.131158000  | -3.066582000 |
| H  | 2.186450000  | 1.003380000  | -2.005845000 |
| N  | 2.639013000  | -0.539562000 | 0.115899000  |
| C  | 2.395264000  | -1.351496000 | -1.204510000 |
| C  | 2.366165000  | -1.987540000 | 0.077358000  |
| C  | 2.327046000  | -3.004745000 | 0.917107000  |
| H  | 2.458922000  | -2.781160000 | 1.977110000  |
| C  | 2.073149000  | -4.410862000 | 0.483354000  |
| H  | 1.149250000  | -4.786271000 | 0.954604000  |
| H  | 1.972806000  | -4.504627000 | -0.607207000 |
| H  | 2.891069000  | -5.068078000 | 0.824412000  |
| H  | 1.444629000  | -1.055958000 | -1.657422000 |
| C  | 3.594000000  | -1.459636000 | -2.108330000 |
| C  | 4.836797000  | -1.750512000 | -1.299183000 |
| O  | 5.017061000  | -0.767122000 | -0.246868000 |
| C  | 4.061500000  | -0.164968000 | 0.434216000  |
| O  | 4.283749000  | 0.653730000  | 1.271629000  |
| H  | 4.793428000  | -2.741879000 | -0.824885000 |
| H  | 5.749300000  | -1.683483000 | -1.904089000 |
| H  | 3.417242000  | -2.282898000 | -2.818487000 |
| H  | 3.708608000  | -0.531315000 | -2.688375000 |
| Rh | -2.984667000 | -0.255360000 | -0.556858000 |
| O  | -3.220669000 | 1.740601000  | -0.107325000 |
| C  | -2.210045000 | 2.405872000  | 0.270314000  |
| O  | -1.036102000 | 1.948633000  | 0.411700000  |
| O  | -3.341277000 | -0.738220000 | 1.414779000  |
| C  | -2.378364000 | -0.770911000 | 2.236616000  |

|   |              |              |              |
|---|--------------|--------------|--------------|
| O | -1.162133000 | -0.537488000 | 1.960216000  |
| O | -2.461653000 | 0.256465000  | -2.489970000 |
| C | -1.246416000 | 0.460329000  | -2.772008000 |
| O | -0.273970000 | 0.384360000  | -1.953797000 |
| O | -2.611557000 | -2.236513000 | -0.983843000 |
| C | -1.445335000 | -2.701279000 | -0.828931000 |
| O | -0.435181000 | -2.048565000 | -0.420956000 |
| C | -2.691685000 | -1.084504000 | 3.678503000  |
| H | -2.607293000 | -0.155506000 | 4.265613000  |
| H | -3.708616000 | -1.484392000 | 3.782672000  |
| H | -1.956580000 | -1.798747000 | 4.077043000  |
| C | -2.402655000 | 3.863689000  | 0.605511000  |
| H | -1.598974000 | 4.459065000  | 0.147665000  |
| H | -3.384585000 | 4.221539000  | 0.269862000  |
| H | -2.324562000 | 3.988090000  | 1.698042000  |
| C | -1.230214000 | -4.163810000 | -1.130574000 |
| H | -2.084175000 | -4.580152000 | -1.680072000 |
| H | -0.303292000 | -4.297666000 | -1.706073000 |
| H | -1.114247000 | -4.707985000 | -0.179510000 |
| C | -0.893614000 | 0.845849000  | -4.185983000 |
| H | -1.770598000 | 0.793281000  | -4.843404000 |
| H | -0.494880000 | 1.873185000  | -4.182208000 |
| H | -0.097314000 | 0.185821000  | -4.562602000 |

## TS2

|                                              |              |
|----------------------------------------------|--------------|
| Sum of electronic and zero-point Energies=   | -2109.007725 |
| Sum of electronic and thermal Energies=      | -2108.965960 |
| Sum of electronic and thermal Enthalpies=    | -2108.965016 |
| Sum of electronic and thermal Free Energies= | -2109.081642 |

|    |              |              |              |
|----|--------------|--------------|--------------|
| Rh | -0.633162000 | 0.080062000  | -0.149703000 |
| C  | 1.645700000  | 0.303904000  | -0.749688000 |
| C  | 1.418145000  | -0.167329000 | -2.142485000 |
| O  | 1.252094000  | 0.546375000  | -3.111470000 |
| O  | 1.371150000  | -1.518796000 | -2.228096000 |
| C  | 1.091953000  | -2.055057000 | -3.514444000 |
| H  | 0.108167000  | -1.715288000 | -3.871186000 |
| H  | 1.861132000  | -1.758279000 | -4.245682000 |
| H  | 1.091546000  | -3.147660000 | -3.399752000 |
| C  | 2.111112000  | 1.746715000  | -0.615334000 |
| C  | 3.022610000  | 2.283794000  | -1.545565000 |
| C  | 3.522376000  | 3.581490000  | -1.400619000 |
| C  | 3.130176000  | 4.374179000  | -0.316447000 |
| C  | 2.233420000  | 3.850958000  | 0.620232000  |
| C  | 1.728899000  | 2.555006000  | 0.468950000  |
| H  | 1.030486000  | 2.159276000  | 1.203089000  |
| H  | 1.917694000  | 4.455990000  | 1.475209000  |
| H  | 3.521350000  | 5.389230000  | -0.203187000 |
| H  | 4.229026000  | 3.972052000  | -2.138794000 |
| H  | 3.349778000  | 1.672349000  | -2.384798000 |
| N  | 2.507200000  | -0.616043000 | -0.014076000 |
| C  | 1.813991000  | -1.773326000 | 1.689841000  |
| C  | 2.581356000  | -0.586523000 | 1.434390000  |
| C  | 3.163356000  | 0.337966000  | 2.202488000  |
| H  | 3.708832000  | 1.142362000  | 1.703449000  |
| C  | 3.094344000  | 0.352102000  | 3.691131000  |
| H  | 2.616458000  | 1.286996000  | 4.030519000  |
| H  | 2.530352000  | -0.501375000 | 4.096098000  |
| H  | 4.107644000  | 0.341205000  | 4.127771000  |
| H  | 0.798257000  | -1.700655000 | 2.083272000  |
| C  | 2.349463000  | -3.098769000 | 1.339182000  |
| C  | 3.818100000  | -3.072500000 | 0.971565000  |
| O  | 4.133126000  | -2.347644000 | -0.232140000 |
| C  | 3.602759000  | -1.220571000 | -0.710592000 |
| O  | 4.050817000  | -0.741828000 | -1.720487000 |
| H  | 4.411175000  | -2.641333000 | 1.793420000  |
| H  | 4.181388000  | -4.090154000 | 0.778975000  |
| H  | 2.214188000  | -3.750950000 | 2.225268000  |
| H  | 1.717081000  | -3.556133000 | 0.556620000  |
| Rh | -2.979145000 | -0.130633000 | 0.551823000  |

|   |              |              |              |
|---|--------------|--------------|--------------|
| O | -3.472019000 | -0.471925000 | -1.409903000 |
| C | -2.549788000 | -0.503286000 | -2.279544000 |
| O | -1.316583000 | -0.318173000 | -2.053847000 |
| O | -3.169831000 | 1.895112000  | 0.246253000  |
| C | -2.177948000 | 2.551460000  | -0.194587000 |
| O | -1.029340000 | 2.075047000  | -0.447780000 |
| O | -2.624297000 | -2.156974000 | 0.788017000  |
| C | -1.475367000 | -2.625669000 | 0.548767000  |
| O | -0.465659000 | -1.948890000 | 0.170174000  |
| O | -2.360996000 | 0.246857000  | 2.485275000  |
| C | -1.140357000 | 0.479615000  | 2.712684000  |
| O | -0.208197000 | 0.446647000  | 1.845707000  |
| C | -2.372579000 | 4.019968000  | -0.473043000 |
| H | -3.238983000 | 4.412198000  | 0.075596000  |
| H | -1.461646000 | 4.577936000  | -0.213645000 |
| H | -2.548898000 | 4.149613000  | -1.553962000 |
| C | -2.940222000 | -0.821270000 | -3.700724000 |
| H | -2.272132000 | -0.307093000 | -4.404816000 |
| H | -2.835065000 | -1.907946000 | -3.857475000 |
| H | -3.986531000 | -0.543978000 | -3.886714000 |
| C | -0.733446000 | 0.846647000  | 4.117044000  |
| H | -1.559706000 | 0.689333000  | 4.821757000  |
| H | 0.145952000  | 0.260843000  | 4.420863000  |
| H | -0.441173000 | 1.909443000  | 4.130490000  |
| C | -1.255961000 | -4.102564000 | 0.762575000  |
| H | -2.212997000 | -4.639673000 | 0.788023000  |
| H | -0.607846000 | -4.511185000 | -0.025534000 |
| H | -0.746804000 | -4.247232000 | 1.730002000  |

### TS2-iso

|                                              |              |
|----------------------------------------------|--------------|
| Sum of electronic and zero-point Energies=   | -2109.007936 |
| Sum of electronic and thermal Energies=      | -2108.966422 |
| Sum of electronic and thermal Enthalpies=    | -2108.965478 |
| Sum of electronic and thermal Free Energies= | -2109.081307 |

|    |              |              |              |
|----|--------------|--------------|--------------|
| Rh | -0.604356000 | -0.007794000 | 0.114893000  |
| C  | 1.698354000  | 0.481266000  | 0.804730000  |
| C  | 1.468332000  | 0.390898000  | 2.273455000  |
| O  | 1.795123000  | -0.548153000 | 2.980258000  |
| O  | 0.818328000  | 1.450441000  | 2.788572000  |
| C  | 0.423694000  | 1.350722000  | 4.154070000  |
| H  | -0.209560000 | 0.466131000  | 4.309274000  |
| H  | 1.299470000  | 1.290093000  | 4.819675000  |
| H  | -0.146303000 | 2.263533000  | 4.373035000  |
| C  | 1.932128000  | 1.786835000  | 0.105941000  |
| C  | 2.244463000  | 1.770379000  | -1.271823000 |
| C  | 2.490935000  | 2.941445000  | -1.989976000 |
| C  | 2.439824000  | 4.185573000  | -1.354262000 |
| C  | 2.139792000  | 4.224693000  | 0.011990000  |
| C  | 1.889455000  | 3.052999000  | 0.727812000  |
| H  | 1.660330000  | 3.123036000  | 1.786734000  |
| H  | 2.103439000  | 5.184762000  | 0.535382000  |
| H  | 2.633129000  | 5.106578000  | -1.910833000 |
| H  | 2.720934000  | 2.877345000  | -3.057650000 |
| H  | 2.254065000  | 0.822325000  | -1.800992000 |
| N  | 2.649858000  | -0.514698000 | 0.365854000  |
| C  | 2.146512000  | -2.011567000 | -1.190917000 |
| C  | 2.326330000  | -1.927186000 | 0.230064000  |
| C  | 2.262496000  | -2.843245000 | 1.202271000  |
| H  | 2.473993000  | -2.497904000 | 2.215457000  |
| C  | 1.923110000  | -4.274678000 | 0.979282000  |
| H  | 1.088375000  | -4.572734000 | 1.633992000  |
| H  | 1.656807000  | -4.495174000 | -0.064822000 |
| H  | 2.780687000  | -4.912690000 | 1.258322000  |
| H  | 1.152143000  | -2.157883000 | -1.623910000 |
| C  | 3.304533000  | -1.806427000 | -2.075871000 |
| C  | 4.633797000  | -1.869178000 | -1.345461000 |
| O  | 4.882178000  | -0.815409000 | -0.396405000 |
| C  | 4.027662000  | -0.153786000 | 0.394007000  |
| O  | 4.437395000  | 0.735940000  | 1.092765000  |

|    |              |              |              |
|----|--------------|--------------|--------------|
| H  | 4.727004000  | -2.831070000 | -0.816886000 |
| H  | 5.460070000  | -1.789469000 | -2.064031000 |
| H  | 3.278542000  | -2.615000000 | -2.834204000 |
| H  | 3.189645000  | -0.880764000 | -2.674503000 |
| Rh | -2.888815000 | -0.248966000 | -0.749413000 |
| O  | -2.989842000 | 1.797172000  | -0.902681000 |
| C  | -1.991816000 | 2.484888000  | -0.529831000 |
| O  | -0.912383000 | 2.017708000  | -0.058341000 |
| O  | -3.543681000 | -0.139651000 | 1.198636000  |
| C  | -2.698457000 | -0.049026000 | 2.138642000  |
| O  | -1.439636000 | 0.016546000  | 1.995981000  |
| O  | -2.073620000 | -0.333347000 | -2.643743000 |
| C  | -0.822257000 | -0.240279000 | -2.791467000 |
| O  | 0.023182000  | -0.121236000 | -1.847293000 |
| O  | -2.672070000 | -2.283042000 | -0.549757000 |
| C  | -1.586827000 | -2.762199000 | -0.109429000 |
| O  | -0.561308000 | -2.089163000 | 0.220348000  |
| C  | -3.216036000 | -0.020315000 | 3.554949000  |
| H  | -2.821526000 | -0.892668000 | 4.099532000  |
| H  | -2.842633000 | 0.881983000  | 4.062492000  |
| H  | -4.313119000 | -0.035982000 | 3.575781000  |
| C  | -2.068249000 | 3.984437000  | -0.662004000 |
| H  | -1.823699000 | 4.450290000  | 0.304655000  |
| H  | -1.306138000 | 4.315694000  | -1.385254000 |
| H  | -3.063122000 | 4.304682000  | -0.996840000 |
| C  | -1.497164000 | -4.261175000 | 0.032085000  |
| H  | -2.442873000 | -4.737185000 | -0.255694000 |
| H  | -0.682360000 | -4.641697000 | -0.601943000 |
| H  | -1.250779000 | -4.516741000 | 1.073474000  |
| C  | -0.259970000 | -0.271927000 | -4.189367000 |
| H  | 0.427796000  | -1.126713000 | -4.288758000 |
| H  | -1.059385000 | -0.351566000 | -4.936702000 |
| H  | 0.325567000  | 0.644539000  | -4.362445000 |

## INT2

|                                              |             |
|----------------------------------------------|-------------|
| Sum of electronic and zero-point Energies=   | -974.528145 |
| Sum of electronic and thermal Energies=      | -974.508736 |
| Sum of electronic and thermal Enthalpies=    | -974.507791 |
| Sum of electronic and thermal Free Energies= | -974.575790 |

|   |              |              |              |
|---|--------------|--------------|--------------|
| C | -0.462812000 | -0.696617000 | 0.229597000  |
| C | -0.119311000 | -2.064378000 | 0.422001000  |
| O | -0.867202000 | -3.005550000 | 0.677491000  |
| O | 1.247491000  | -2.280930000 | 0.282730000  |
| C | 1.683487000  | -3.624024000 | 0.438838000  |
| H | 1.458232000  | -4.009109000 | 1.447169000  |
| H | 1.208197000  | -4.292266000 | -0.297617000 |
| H | 2.771337000  | -3.619339000 | 0.280917000  |
| C | -1.812172000 | -0.196520000 | 0.035529000  |
| C | -2.088907000 | 0.951044000  | -0.751784000 |
| C | -3.388401000 | 1.434807000  | -0.917412000 |
| C | -4.475870000 | 0.785756000  | -0.322460000 |
| C | -4.228934000 | -0.366372000 | 0.437000000  |
| C | -2.932952000 | -0.848288000 | 0.618608000  |
| H | -2.764243000 | -1.747477000 | 1.210058000  |
| H | -5.063059000 | -0.898251000 | 0.905441000  |
| H | -5.493786000 | 1.161352000  | -0.455446000 |
| H | -3.551495000 | 2.322535000  | -1.536348000 |
| H | -1.277420000 | 1.452343000  | -1.280591000 |
| N | 0.667840000  | 0.178666000  | -0.073254000 |
| C | 1.724600000  | 0.359512000  | 1.083436000  |
| C | 0.842228000  | 1.422531000  | 0.706514000  |
| C | 0.412086000  | 2.673448000  | 0.690668000  |
| H | -0.340070000 | 2.962060000  | -0.047123000 |
| C | 0.898544000  | 3.714236000  | 1.648126000  |
| H | 0.051361000  | 4.122419000  | 2.224952000  |
| H | 1.647182000  | 3.319921000  | 2.350871000  |
| H | 1.339650000  | 4.559793000  | 1.093231000  |
| H | 1.455212000  | -0.285656000 | 1.923028000  |
| C | 3.159381000  | 0.323822000  | 0.635515000  |

|   |             |              |              |
|---|-------------|--------------|--------------|
| C | 3.329761000 | 1.088426000  | -0.657138000 |
| O | 2.431219000 | 0.586224000  | -1.680317000 |
| C | 1.209202000 | 0.133520000  | -1.477185000 |
| O | 0.522464000 | -0.302446000 | -2.348431000 |
| H | 3.128247000 | 2.162688000  | -0.530289000 |
| H | 4.334250000 | 0.962633000  | -1.078919000 |
| H | 3.787611000 | 0.778460000  | 1.418029000  |
| H | 3.462556000 | -0.726562000 | 0.514503000  |

### INT2-iso

Sum of electronic and zero-point Energies= -974.528339  
Sum of electronic and thermal Energies= -974.509005  
Sum of electronic and thermal Enthalpies= -974.508060  
Sum of electronic and thermal Free Energies= -974.575898

|   |              |              |              |
|---|--------------|--------------|--------------|
| C | -0.522985000 | 0.495458000  | 0.051837000  |
| C | -0.423928000 | 1.888654000  | -0.238214000 |
| O | 0.611220000  | 2.483994000  | -0.552527000 |
| O | -1.608832000 | 2.567205000  | -0.155069000 |
| C | -1.566455000 | 3.945997000  | -0.496682000 |
| H | -0.900626000 | 4.513211000  | 0.174785000  |
| H | -1.218699000 | 4.098012000  | -1.531844000 |
| H | -2.595141000 | 4.319886000  | -0.395818000 |
| C | -1.697893000 | -0.345265000 | 0.205113000  |
| C | -2.934739000 | 0.154332000  | 0.703453000  |
| C | -4.045017000 | -0.671450000 | 0.864791000  |
| C | -3.989534000 | -2.037408000 | 0.551691000  |
| C | -2.786786000 | -2.554231000 | 0.062341000  |
| C | -1.670145000 | -1.732084000 | -0.110588000 |
| H | -0.770804000 | -2.186805000 | -0.527714000 |
| H | -2.711644000 | -3.613328000 | -0.202565000 |
| H | -4.863694000 | -2.679660000 | 0.685665000  |
| H | -4.972479000 | -0.240165000 | 1.254350000  |
| H | -3.008353000 | 1.207191000  | 0.968838000  |
| N | 0.758543000  | -0.179919000 | -0.128582000 |
| C | 1.247660000  | -1.149077000 | 1.010317000  |
| C | 1.818463000  | 0.154213000  | 0.845954000  |
| C | 2.711589000  | 1.114615000  | 1.020094000  |
| H | 2.657948000  | 1.963130000  | 0.334667000  |
| C | 3.730811000  | 1.102798000  | 2.113743000  |
| H | 3.591605000  | 1.977497000  | 2.772032000  |
| H | 3.681268000  | 0.190472000  | 2.726763000  |
| H | 4.744818000  | 1.189348000  | 1.687342000  |
| H | 0.443845000  | -1.308421000 | 1.735938000  |
| C | 1.981311000  | -2.369644000 | 0.518034000  |
| C | 2.919061000  | -2.001523000 | -0.612274000 |
| O | 2.211383000  | -1.321034000 | -1.682268000 |
| C | 1.168049000  | -0.524051000 | -1.533662000 |
| O | 0.544951000  | -0.085924000 | -2.449258000 |
| H | 3.731504000  | -1.342965000 | -0.272193000 |
| H | 3.355833000  | -2.889696000 | -1.085134000 |
| H | 2.563238000  | -2.787870000 | 1.354640000  |
| H | 1.255044000  | -3.132334000 | 0.197625000  |

### TS3

Sum of electronic and zero-point Energies= -974.523629  
Sum of electronic and thermal Energies= -974.504172  
Sum of electronic and thermal Enthalpies= -974.503228  
Sum of electronic and thermal Free Energies= -974.572015

|   |              |             |              |
|---|--------------|-------------|--------------|
| C | 0.489959000  | 0.661295000 | -0.107443000 |
| C | 0.099301000  | 1.992076000 | 0.330101000  |
| O | 0.835592000  | 2.943968000 | 0.544396000  |
| O | -1.247892000 | 2.066356000 | 0.543472000  |
| C | -1.746140000 | 3.330468000 | 0.972741000  |
| H | -1.260523000 | 3.654795000 | 1.906681000  |
| H | -1.576467000 | 4.101944000 | 0.204253000  |
| H | -2.824215000 | 3.199979000 | 1.135745000  |
| C | 1.876384000  | 0.220465000 | -0.142440000 |

|   |              |              |              |
|---|--------------|--------------|--------------|
| C | 2.266268000  | -0.802290000 | -1.044102000 |
| C | 3.583332000  | -1.251852000 | -1.103103000 |
| C | 4.562202000  | -0.686857000 | -0.273740000 |
| C | 4.200431000  | 0.337855000  | 0.609997000  |
| C | 2.882075000  | 0.787866000  | 0.678792000  |
| H | 2.616867000  | 1.586049000  | 1.371432000  |
| H | 4.955521000  | 0.789236000  | 1.259802000  |
| H | 5.597213000  | -1.034930000 | -0.323263000 |
| H | 3.854649000  | -2.038591000 | -1.812644000 |
| H | 1.517007000  | -1.226418000 | -1.716550000 |
| N | -0.524742000 | -0.224884000 | -0.434862000 |
| C | -2.004123000 | -0.756037000 | 1.288282000  |
| C | -0.874147000 | -1.284916000 | 0.583509000  |
| C | -0.153790000 | -2.402695000 | 0.729007000  |
| H | 0.677465000  | -2.583510000 | 0.044742000  |
| C | -0.419364000 | -3.437026000 | 1.773608000  |
| H | 0.488068000  | -3.617592000 | 2.375682000  |
| H | -1.241911000 | -3.147238000 | 2.445692000  |
| H | -0.678486000 | -4.402952000 | 1.304998000  |
| H | -1.860998000 | -0.197548000 | 2.219726000  |
| C | -3.331715000 | -0.712399000 | 0.631384000  |
| C | -3.299175000 | -1.353760000 | -0.739891000 |
| O | -2.524545000 | -0.592131000 | -1.686654000 |
| C | -1.385606000 | 0.094250000  | -1.508181000 |
| O | -1.072607000 | 0.925920000  | -2.325535000 |
| H | -2.906511000 | -2.381701000 | -0.689400000 |
| H | -4.304304000 | -1.390783000 | -1.180810000 |
| H | -4.078880000 | -1.238603000 | 1.260691000  |
| H | -3.701026000 | 0.330490000  | 0.560695000  |

### TS3-iso

Sum of electronic and zero-point Energies= -974.522625  
Sum of electronic and thermal Energies= -974.503313  
Sum of electronic and thermal Enthalpies= -974.502368  
Sum of electronic and thermal Free Energies= -974.570679

|   |              |              |              |
|---|--------------|--------------|--------------|
| C | -0.566233000 | 0.475381000  | -0.298052000 |
| C | -0.756917000 | 1.927620000  | -0.422788000 |
| O | 0.017281000  | 2.683873000  | -0.989433000 |
| O | -1.893083000 | 2.384769000  | 0.149012000  |
| C | -2.169567000 | 3.776198000  | -0.009335000 |
| H | -1.400117000 | 4.390229000  | 0.485272000  |
| H | -2.209958000 | 4.056568000  | -1.073686000 |
| H | -3.145896000 | 3.950039000  | 0.462133000  |
| C | -1.587080000 | -0.493673000 | 0.052131000  |
| C | -2.984993000 | -0.225493000 | -0.014040000 |
| C | -3.921660000 | -1.178963000 | 0.365265000  |
| C | -3.519798000 | -2.442506000 | 0.828889000  |
| C | -2.156415000 | -2.738652000 | 0.884092000  |
| C | -1.207070000 | -1.793522000 | 0.489841000  |
| H | -0.158135000 | -2.076412000 | 0.522212000  |
| H | -1.821738000 | -3.722667000 | 1.224108000  |
| H | -4.263346000 | -3.187160000 | 1.124304000  |
| H | -4.986238000 | -0.938487000 | 0.294549000  |
| H | -3.327118000 | 0.741775000  | -0.374476000 |
| N | 0.737400000  | 0.041679000  | -0.474482000 |
| C | 1.878793000  | -0.763168000 | 1.396902000  |
| C | 1.751222000  | 0.408821000  | 0.578567000  |
| C | 2.342482000  | 1.608806000  | 0.614498000  |
| H | 2.092672000  | 2.321642000  | -0.172759000 |
| C | 3.322599000  | 2.023458000  | 1.661914000  |
| H | 3.454903000  | 1.255586000  | 2.440033000  |
| H | 4.307953000  | 2.228170000  | 1.206560000  |
| H | 3.001250000  | 2.965111000  | 2.139872000  |
| H | 1.335059000  | -0.859927000 | 2.342957000  |
| C | 2.617226000  | -1.935154000 | 0.858676000  |
| C | 3.225455000  | -1.645228000 | -0.498877000 |
| O | 2.240673000  | -1.472808000 | -1.538464000 |
| C | 1.040983000  | -0.871139000 | -1.507783000 |
| O | 0.259125000  | -1.085416000 | -2.401734000 |

|   |             |              |              |
|---|-------------|--------------|--------------|
| H | 3.870621000 | -0.753829000 | -0.460932000 |
| H | 3.831338000 | -2.494040000 | -0.843015000 |
| H | 3.432971000 | -2.208340000 | 1.559543000  |
| H | 1.977844000 | -2.840078000 | 0.810252000  |

### Compound 3aa

|                                              |             |
|----------------------------------------------|-------------|
| Sum of electronic and zero-point Energies=   | -974.625647 |
| Sum of electronic and thermal Energies=      | -974.606952 |
| Sum of electronic and thermal Enthalpies=    | -974.606008 |
| Sum of electronic and thermal Free Energies= | -974.672579 |

|   |              |              |              |
|---|--------------|--------------|--------------|
| C | -0.390853000 | 0.344798000  | -0.253320000 |
| C | -0.328180000 | 1.657275000  | 0.550117000  |
| O | -1.292457000 | 2.302284000  | 0.882379000  |
| O | 0.933955000  | 2.030880000  | 0.773577000  |
| C | 1.129657000  | 3.245748000  | 1.508992000  |
| H | 0.647042000  | 4.092696000  | 0.998088000  |
| H | 0.713974000  | 3.149750000  | 2.523561000  |
| H | 2.214598000  | 3.400029000  | 1.558144000  |
| C | -1.749799000 | -0.314744000 | -0.148486000 |
| C | -1.928704000 | -1.534646000 | 0.515370000  |
| C | -3.195309000 | -2.127418000 | 0.577493000  |
| C | -4.294166000 | -1.507566000 | -0.023875000 |
| C | -4.120658000 | -0.287980000 | -0.689705000 |
| C | -2.857653000 | 0.304484000  | -0.750164000 |
| H | -2.728145000 | 1.257298000  | -1.267673000 |
| H | -4.973830000 | 0.204368000  | -1.164087000 |
| H | -5.282734000 | -1.971960000 | 0.024231000  |
| H | -3.320226000 | -3.078919000 | 1.101265000  |
| H | -1.080961000 | -2.024461000 | 0.995193000  |
| N | 0.775686000  | -0.520221000 | -0.003362000 |
| C | 2.589444000  | -0.575577000 | -1.733294000 |
| C | 1.380932000  | -0.261846000 | -1.260850000 |
| C | 0.171224000  | 0.521328000  | -1.737345000 |
| H | -0.453511000 | -0.083916000 | -2.412060000 |
| C | 0.373062000  | 1.909741000  | -2.319850000 |
| H | -0.591225000 | 2.432627000  | -2.420437000 |
| H | 1.041001000  | 2.521887000  | -1.697877000 |
| H | 0.817797000  | 1.831887000  | -3.324484000 |
| H | 2.851518000  | -0.226837000 | -2.735754000 |
| C | 3.591981000  | -1.386097000 | -0.958140000 |
| C | 2.975863000  | -2.212455000 | 0.163664000  |
| O | 2.482041000  | -1.424219000 | 1.270243000  |
| C | 1.284642000  | -0.817482000 | 1.241553000  |
| O | 0.693416000  | -0.542315000 | 2.264015000  |
| H | 2.161090000  | -2.850747000 | -0.216617000 |
| H | 3.736794000  | -2.861500000 | 0.617339000  |
| H | 4.108622000  | -2.087401000 | -1.636873000 |
| H | 4.383860000  | -0.741672000 | -0.533097000 |

### Compound 3aa-iso

|                                              |             |
|----------------------------------------------|-------------|
| Sum of electronic and zero-point Energies=   | -974.620725 |
| Sum of electronic and thermal Energies=      | -974.601973 |
| Sum of electronic and thermal Enthalpies=    | -974.601028 |
| Sum of electronic and thermal Free Energies= | -974.668453 |

|   |              |              |              |
|---|--------------|--------------|--------------|
| C | 0.266470000  | 0.284690000  | -0.446351000 |
| C | 0.376646000  | 1.823935000  | -0.406662000 |
| O | -0.542761000 | 2.532297000  | -0.747187000 |
| O | 1.543672000  | 2.281182000  | 0.031291000  |
| C | 1.685156000  | 3.706484000  | 0.123182000  |
| H | 1.550721000  | 4.176733000  | -0.862880000 |
| H | 0.944730000  | 4.120771000  | 0.824287000  |
| H | 2.701425000  | 3.886512000  | 0.494617000  |
| C | 1.459933000  | -0.498302000 | 0.066239000  |
| C | 2.729760000  | -0.276070000 | -0.494733000 |
| C | 3.827502000  | -1.045063000 | -0.104060000 |
| C | 3.675492000  | -2.053759000 | 0.854673000  |
| C | 2.415195000  | -2.287983000 | 1.410321000  |



|   |              |              |              |
|---|--------------|--------------|--------------|
| C | 1.314237000  | -1.519902000 | 1.014450000  |
| H | 0.336235000  | -1.729069000 | 1.448541000  |
| H | 2.281867000  | -3.075701000 | 2.156586000  |
| H | 4.534866000  | -2.654944000 | 1.163245000  |
| H | 4.806761000  | -0.855941000 | -0.552020000 |
| H | 2.860646000  | 0.506920000  | -1.243474000 |
| N | -1.038052000 | -0.084717000 | 0.125190000  |
| C | -2.762076000 | -1.155806000 | -1.323671000 |
| C | -1.577941000 | -0.590853000 | -1.074447000 |
| C | -0.321506000 | -0.231708000 | -1.847995000 |
| H | -0.499535000 | 0.625678000  | -2.513478000 |
| C | 0.399710000  | -1.347867000 | -2.580704000 |
| H | 0.576139000  | -2.215228000 | -1.927711000 |
| H | -0.211061000 | -1.679841000 | -3.435632000 |
| H | 1.370454000  | -1.005722000 | -2.970735000 |
| H | -2.964603000 | -1.503507000 | -2.339761000 |
| C | -3.832021000 | -1.270332000 | -0.270554000 |
| C | -3.823566000 | -0.118854000 | 0.732459000  |
| O | -2.743175000 | -0.153244000 | 1.692319000  |
| C | -1.483288000 | 0.206615000  | 1.388874000  |
| O | -0.757859000 | 0.720745000  | 2.215456000  |
| H | -3.806583000 | 0.851964000  | 0.210072000  |
| H | -4.725421000 | -0.157972000 | 1.358138000  |
| H | -4.824387000 | -1.272092000 | -0.751758000 |
| H | -3.763116000 | -2.224730000 | 0.284474000  |

### INT2-E

|                                              |             |
|----------------------------------------------|-------------|
| Sum of electronic and zero-point Energies=   | -971.385789 |
| Sum of electronic and thermal Energies=      | -971.366705 |
| Sum of electronic and thermal Enthalpies=    | -971.365761 |
| Sum of electronic and thermal Free Energies= | -971.432860 |

|   |              |              |              |
|---|--------------|--------------|--------------|
| C | 0.805768000  | 0.725182000  | -0.351583000 |
| C | 2.138414000  | 0.218677000  | -0.525392000 |
| O | 3.156424000  | 0.836286000  | -0.783965000 |
| O | 2.171226000  | -1.156523000 | -0.352236000 |
| C | 3.449074000  | -1.769127000 | -0.475281000 |
| H | 3.874310000  | -1.619225000 | -1.481227000 |
| H | 4.161195000  | -1.367937000 | 0.264019000  |
| H | 3.298330000  | -2.842646000 | -0.295080000 |
| N | -0.198204000 | -0.261710000 | 0.019317000  |
| C | -0.554638000 | -1.345957000 | -1.058560000 |
| C | -1.482637000 | -0.311564000 | -0.707930000 |
| C | -2.657471000 | 0.292108000  | -0.659055000 |
| H | -2.768354000 | 1.121789000  | 0.042585000  |
| C | -3.817544000 | -0.092554000 | -1.519489000 |
| H | -4.132706000 | 0.765823000  | -2.137064000 |
| H | -3.586430000 | -0.938713000 | -2.183268000 |
| H | -4.681920000 | -0.360205000 | -0.887843000 |
| H | 0.084845000  | -1.214362000 | -1.935304000 |
| C | -0.682838000 | -2.742295000 | -0.515847000 |
| C | -1.430926000 | -2.730511000 | 0.798323000  |
| O | -0.797212000 | -1.836455000 | 1.750719000  |
| C | -0.176907000 | -0.710172000 | 1.455808000  |
| O | 0.395819000  | -0.048383000 | 2.263612000  |
| H | -2.474779000 | -2.405322000 | 0.675033000  |
| H | -1.419168000 | -3.712986000 | 1.285504000  |
| H | -1.230115000 | -3.358908000 | -1.246272000 |
| H | 0.325436000  | -3.164974000 | -0.392660000 |
| C | 0.523086000  | 2.113203000  | -0.112643000 |
| O | 1.249911000  | 3.067024000  | -0.335034000 |
| O | -0.727146000 | 2.293545000  | 0.434582000  |
| C | -1.110375000 | 3.639702000  | 0.683370000  |
| H | -2.133357000 | 3.604231000  | 1.083839000  |
| H | -0.444245000 | 4.117987000  | 1.419792000  |
| H | -1.095819000 | 4.243324000  | -0.239017000 |

**TS3-E**

|                                              |             |
|----------------------------------------------|-------------|
| Sum of electronic and zero-point Energies=   | -971.370382 |
| Sum of electronic and thermal Energies=      | -971.350941 |
| Sum of electronic and thermal Enthalpies=    | -971.349997 |
| Sum of electronic and thermal Free Energies= | -971.419628 |

|   |              |              |              |
|---|--------------|--------------|--------------|
| C | -0.821769000 | 0.706809000  | -0.024512000 |
| C | -0.362890000 | 2.013031000  | -0.449263000 |
| O | -1.018116000 | 3.004942000  | -0.709509000 |
| O | 1.011455000  | 2.013422000  | -0.576326000 |
| C | 1.595536000  | 3.244808000  | -0.987459000 |
| H | 1.233268000  | 3.549458000  | -1.982737000 |
| H | 1.364453000  | 4.051683000  | -0.273455000 |
| H | 2.681036000  | 3.079281000  | -1.020777000 |
| N | 0.142982000  | -0.221875000 | 0.376057000  |
| C | 1.647000000  | -0.766667000 | -1.200536000 |
| C | 0.479694000  | -1.309010000 | -0.573027000 |
| C | -0.258886000 | -2.405305000 | -0.780174000 |
| H | -1.132190000 | -2.546809000 | -0.140441000 |
| C | 0.044892000  | -3.436813000 | -1.812722000 |
| H | -0.836832000 | -3.602196000 | -2.455522000 |
| H | 0.904568000  | -3.164310000 | -2.444283000 |
| H | 0.262736000  | -4.406816000 | -1.331721000 |
| H | 1.591035000  | -0.314974000 | -2.198358000 |
| C | 2.909719000  | -0.656975000 | -0.449554000 |
| C | 2.850487000  | -1.358759000 | 0.890710000  |
| O | 1.964353000  | -0.715181000 | 1.825838000  |
| C | 0.868222000  | 0.014933000  | 1.567262000  |
| O | 0.485378000  | 0.818539000  | 2.378885000  |
| H | 2.542520000  | -2.409459000 | 0.769917000  |
| H | 3.833307000  | -1.340070000 | 1.380201000  |
| H | 3.712662000  | -1.102833000 | -1.071058000 |
| H | 3.195720000  | 0.408436000  | -0.342828000 |
| C | -2.231137000 | 0.362660000  | 0.001820000  |
| O | -3.151942000 | 1.016253000  | -0.455939000 |
| O | -2.456810000 | -0.818544000 | 0.655000000  |
| C | -3.811501000 | -1.253467000 | 0.708092000  |
| H | -4.230340000 | -1.398127000 | -0.301604000 |
| H | -3.808968000 | -2.209493000 | 1.249386000  |
| H | -4.444595000 | -0.527558000 | 1.243486000  |

**Compound 3bc'**

|                                              |             |
|----------------------------------------------|-------------|
| Sum of electronic and zero-point Energies=   | -971.469165 |
| Sum of electronic and thermal Energies=      | -971.450512 |
| Sum of electronic and thermal Enthalpies=    | -971.449568 |
| Sum of electronic and thermal Free Energies= | -971.516105 |

|   |              |              |              |
|---|--------------|--------------|--------------|
| C | 0.706698000  | 0.100521000  | 0.441884000  |
| C | 1.263778000  | 1.219011000  | -0.447218000 |
| O | 2.432625000  | 1.332706000  | -0.728017000 |
| O | 0.302185000  | 2.051733000  | -0.835686000 |
| C | 0.682923000  | 3.109128000  | -1.728284000 |
| H | 1.441327000  | 3.756517000  | -1.263086000 |
| H | 1.084312000  | 2.689907000  | -2.663145000 |
| H | -0.231770000 | 3.679486000  | -1.930457000 |
| N | -0.611548000 | -0.388638000 | 0.027132000  |
| C | -2.580070000 | 0.195418000  | 1.464023000  |
| C | -1.280016000 | 0.127398000  | 1.171607000  |
| C | 0.034220000  | 0.566195000  | 1.798258000  |
| H | 0.351657000  | -0.121027000 | 2.596898000  |
| C | 0.190654000  | 2.002777000  | 2.266205000  |
| H | 1.249915000  | 2.217390000  | 2.479546000  |
| H | -0.171414000 | 2.719878000  | 1.516961000  |
| H | -0.379284000 | 2.155044000  | 3.196109000  |
| H | -2.868928000 | 0.678141000  | 2.401427000  |
| C | -3.651613000 | -0.367851000 | 0.570097000  |
| C | -3.143079000 | -1.417433000 | -0.411585000 |
| O | -2.307325000 | -0.881612000 | -1.461709000 |
| C | -1.007066000 | -0.602389000 | -1.278322000 |

|   |              |              |              |
|---|--------------|--------------|--------------|
| O | -0.242141000 | -0.524909000 | -2.213278000 |
| H | -2.597394000 | -2.218978000 | 0.113157000  |
| H | -3.986754000 | -1.871594000 | -0.948121000 |
| H | -4.434332000 | -0.845702000 | 1.184900000  |
| H | -4.161878000 | 0.433429000  | 0.003920000  |
| C | 1.789739000  | -0.960904000 | 0.632877000  |
| O | 2.605054000  | -0.911288000 | 1.522003000  |
| O | 1.711086000  | -1.923274000 | -0.278554000 |
| C | 2.690866000  | -2.969867000 | -0.202033000 |
| H | 2.619676000  | -3.497448000 | 0.761592000  |
| H | 2.466208000  | -3.655402000 | -1.028382000 |
| H | 3.705394000  | -2.558058000 | -0.314373000 |

### Int1-b

|                                              |              |
|----------------------------------------------|--------------|
| Sum of electronic and zero-point Energies=   | -2110.230923 |
| Sum of electronic and thermal Energies=      | -2110.188903 |
| Sum of electronic and thermal Enthalpies=    | -2110.187959 |
| Sum of electronic and thermal Free Energies= | -2110.305171 |

|    |              |              |              |
|----|--------------|--------------|--------------|
| Rh | -0.698807000 | -0.054520000 | 0.010305000  |
| C  | 1.529231000  | -0.499069000 | 0.539571000  |
| C  | 1.358972000  | -0.555753000 | 2.016200000  |
| O  | 1.564655000  | 0.332436000  | 2.830320000  |
| O  | 0.886074000  | -1.757476000 | 2.390913000  |
| C  | 0.410333000  | -1.869726000 | 3.728843000  |
| H  | 1.211907000  | -1.673278000 | 4.458529000  |
| H  | -0.415569000 | -1.163867000 | 3.902676000  |
| H  | 0.050162000  | -2.901287000 | 3.838530000  |
| C  | 2.155765000  | -1.776586000 | -0.012320000 |
| C  | 1.653042000  | -2.444444000 | -1.138142000 |
| C  | 2.283350000  | -3.593752000 | -1.629470000 |
| C  | 3.432821000  | -4.093806000 | -1.011812000 |
| C  | 3.951886000  | -3.434712000 | 0.108989000  |
| C  | 3.317953000  | -2.290956000 | 0.599415000  |
| H  | 3.727170000  | -1.794942000 | 1.484099000  |
| H  | 4.848724000  | -3.815983000 | 0.605258000  |
| H  | 3.922215000  | -4.991836000 | -1.399031000 |
| H  | 1.869556000  | -4.099041000 | -2.506832000 |
| H  | 0.769267000  | -2.049838000 | -1.633741000 |
| N  | 2.503307000  | 0.635473000  | 0.127342000  |
| C  | 3.622459000  | 1.122770000  | 1.033475000  |
| C  | 2.511358000  | 2.046459000  | 0.690533000  |
| H  | 3.511807000  | 0.689735000  | 2.026036000  |
| C  | 5.029702000  | 1.044670000  | 0.504514000  |
| C  | 5.139290000  | 1.263390000  | -0.987362000 |
| O  | 4.056900000  | 0.628680000  | -1.710771000 |
| C  | 2.787035000  | 0.614645000  | -1.341034000 |
| O  | 1.890671000  | 0.549876000  | -2.118130000 |
| H  | 5.131819000  | 2.328990000  | -1.259264000 |
| H  | 6.052863000  | 0.814636000  | -1.396136000 |
| H  | 5.656701000  | 1.781205000  | 1.031262000  |
| H  | 5.410882000  | 0.045136000  | 0.762360000  |
| Rh | -3.089856000 | 0.368355000  | -0.429277000 |
| O  | -3.420874000 | -1.624667000 | -0.001017000 |
| C  | -2.443152000 | -2.368099000 | 0.308118000  |
| O  | -1.230609000 | -2.005650000 | 0.388504000  |
| O  | -2.775465000 | -0.116349000 | -2.402654000 |
| C  | -1.620620000 | -0.502827000 | -2.751856000 |
| O  | -0.605882000 | -0.566261000 | -1.998696000 |
| O  | -3.299853000 | 0.830761000  | 1.571117000  |
| C  | -2.286277000 | 0.780676000  | 2.326472000  |
| O  | -1.112089000 | 0.468435000  | 1.965236000  |
| O  | -2.569825000 | 2.326346000  | -0.820802000 |
| C  | -1.363343000 | 2.692879000  | -0.718556000 |
| O  | -0.385414000 | 1.949843000  | -0.391946000 |
| C  | -1.044933000 | 4.136699000  | -1.027702000 |
| H  | -1.964801000 | 4.722635000  | -1.149521000 |
| H  | -0.426784000 | 4.567594000  | -0.226358000 |
| H  | -0.460669000 | 4.182331000  | -1.960944000 |
| C  | -2.491417000 | 1.085861000  | 3.790131000  |

|   |              |              |              |
|---|--------------|--------------|--------------|
| H | -1.540311000 | 1.353020000  | 4.268737000  |
| H | -3.226879000 | 1.893701000  | 3.912777000  |
| H | -2.895081000 | 0.185553000  | 4.282593000  |
| C | -1.433231000 | -0.962599000 | -4.176701000 |
| H | -2.228241000 | -0.571173000 | -4.825250000 |
| H | -0.444644000 | -0.656833000 | -4.547327000 |
| H | -1.472999000 | -2.064813000 | -4.194146000 |
| C | -2.727998000 | -3.814871000 | 0.629953000  |
| H | -3.772982000 | -4.071021000 | 0.413160000  |
| H | -2.049717000 | -4.462139000 | 0.053729000  |
| H | -2.520556000 | -3.989282000 | 1.698243000  |
| H | 1.759400000  | 2.121281000  | 1.477226000  |
| C | 2.547176000  | 3.234218000  | -0.240287000 |
| H | 3.289047000  | 3.121730000  | -1.041743000 |
| H | 1.562396000  | 3.288821000  | -0.720090000 |
| C | 2.832750000  | 4.513379000  | 0.548894000  |
| H | 3.826944000  | 4.484265000  | 1.023887000  |
| H | 2.085167000  | 4.665467000  | 1.344309000  |
| H | 2.800659000  | 5.389878000  | -0.116445000 |

**TS4-b**

|                                              |              |
|----------------------------------------------|--------------|
| Sum of electronic and zero-point Energies=   | -2110.212077 |
| Sum of electronic and thermal Energies=      | -2110.170342 |
| Sum of electronic and thermal Enthalpies=    | -2110.169398 |
| Sum of electronic and thermal Free Energies= | -2110.289462 |

|    |              |              |              |
|----|--------------|--------------|--------------|
| Rh | 0.899945000  | -0.106371000 | -0.006379000 |
| C  | -2.167924000 | 0.738161000  | 0.706259000  |
| C  | -1.643584000 | 0.490879000  | 2.071925000  |
| O  | -1.603132000 | -0.604106000 | 2.607476000  |
| O  | -1.248368000 | 1.610741000  | 2.700387000  |
| C  | -0.579120000 | 1.432872000  | 3.947207000  |
| H  | -1.245052000 | 0.970560000  | 4.692835000  |
| H  | 0.312427000  | 0.802085000  | 3.817857000  |
| H  | -0.283168000 | 2.435637000  | 4.281548000  |
| C  | -2.323951000 | 2.099604000  | 0.158577000  |
| C  | -1.319183000 | 3.081731000  | 0.296542000  |
| C  | -1.503272000 | 4.361401000  | -0.225835000 |
| C  | -2.689722000 | 4.697052000  | -0.892004000 |
| C  | -3.689009000 | 3.729729000  | -1.043136000 |
| C  | -3.502804000 | 2.442750000  | -0.535348000 |
| H  | -4.285574000 | 1.694467000  | -0.672724000 |
| H  | -4.616828000 | 3.975605000  | -1.567031000 |
| H  | -2.828962000 | 5.702511000  | -1.298259000 |
| H  | -0.708075000 | 5.104777000  | -0.119738000 |
| H  | -0.385366000 | 2.821355000  | 0.791727000  |
| N  | -2.695849000 | -0.340789000 | 0.105632000  |
| C  | -5.043660000 | -0.743604000 | 0.287969000  |
| C  | -3.913146000 | -1.295188000 | 0.943324000  |
| H  | -5.480898000 | 0.142663000  | 0.758097000  |
| C  | -5.541975000 | -1.053709000 | -1.078514000 |
| C  | -4.633951000 | -1.977841000 | -1.857020000 |
| O  | -3.250133000 | -1.563996000 | -1.854042000 |
| C  | -2.651382000 | -0.486479000 | -1.309648000 |
| O  | -1.946526000 | 0.210823000  | -1.992708000 |
| H  | -4.663348000 | -2.997003000 | -1.446006000 |
| H  | -4.939465000 | -2.031720000 | -2.912990000 |
| H  | -6.548263000 | -1.518750000 | -1.047652000 |
| H  | -5.684812000 | -0.106284000 | -1.633259000 |
| Rh | 3.231954000  | -0.440164000 | -0.455412000 |
| O  | 3.644079000  | 0.920940000  | 1.029473000  |
| C  | 2.686988000  | 1.460579000  | 1.664033000  |
| O  | 1.455975000  | 1.238965000  | 1.450305000  |
| O  | 3.124405000  | 1.097195000  | -1.817617000 |
| C  | 2.015263000  | 1.697310000  | -1.981367000 |
| O  | 0.940573000  | 1.420876000  | -1.371218000 |
| O  | 3.223109000  | -1.946303000 | 0.939175000  |
| C  | 2.135140000  | -2.243504000 | 1.525240000  |
| O  | 1.025905000  | -1.659999000 | 1.340993000  |
| O  | 2.686490000  | -1.783340000 | -1.912558000 |

|   |              |              |              |
|---|--------------|--------------|--------------|
| C | 1.452253000  | -2.018041000 | -2.107638000 |
| O | 0.500676000  | -1.478148000 | -1.469911000 |
| C | 1.100562000  | -3.025497000 | -3.168862000 |
| H | 0.017859000  | -3.040191000 | -3.347080000 |
| H | 1.637969000  | -2.785874000 | -4.098743000 |
| H | 1.434471000  | -4.022574000 | -2.838822000 |
| C | 2.161565000  | -3.403177000 | 2.484807000  |
| H | 3.138053000  | -3.468495000 | 2.984225000  |
| H | 1.352135000  | -3.314643000 | 3.221452000  |
| H | 2.009337000  | -4.331272000 | 1.908275000  |
| C | 1.959729000  | 2.800525000  | -3.004035000 |
| H | 1.210225000  | 3.549448000  | -2.713740000 |
| H | 2.946792000  | 3.264741000  | -3.132726000 |
| H | 1.650624000  | 2.363150000  | -3.968244000 |
| C | 3.032920000  | 2.404605000  | 2.783794000  |
| H | 4.022192000  | 2.853395000  | 2.623378000  |
| H | 2.264593000  | 3.183522000  | 2.881650000  |
| H | 3.060359000  | 1.828732000  | 3.724172000  |
| H | -3.805250000 | -0.893596000 | 1.952741000  |
| C | -3.432141000 | -2.739619000 | 0.941032000  |
| H | -3.187704000 | -3.094017000 | -0.066972000 |
| H | -2.489381000 | -2.742488000 | 1.507548000  |
| C | -4.451251000 | -3.671320000 | 1.599935000  |
| H | -5.393615000 | -3.711028000 | 1.028710000  |
| H | -4.696833000 | -3.342606000 | 2.623763000  |
| H | -4.053460000 | -4.697004000 | 1.665713000  |

#### INT2-b

|                                              |             |
|----------------------------------------------|-------------|
| Sum of electronic and zero-point Energies=   | -975.745795 |
| Sum of electronic and thermal Energies=      | -975.726326 |
| Sum of electronic and thermal Enthalpies=    | -975.725381 |
| Sum of electronic and thermal Free Energies= | -975.793752 |

|   |              |              |              |
|---|--------------|--------------|--------------|
| C | 0.628154000  | 0.534336000  | -0.123104000 |
| C | 0.575238000  | 1.946274000  | 0.075862000  |
| O | -0.454147000 | 2.611806000  | 0.234270000  |
| O | 1.796313000  | 2.564258000  | 0.063520000  |
| C | 1.789103000  | 3.972242000  | 0.255770000  |
| H | 1.234983000  | 4.491275000  | -0.544221000 |
| H | 1.335514000  | 4.248528000  | 1.221765000  |
| H | 2.841010000  | 4.290766000  | 0.239163000  |
| C | 1.761530000  | -0.369264000 | -0.185837000 |
| C | 3.070378000  | 0.054873000  | -0.556504000 |
| C | 4.134717000  | -0.840294000 | -0.637632000 |
| C | 3.965210000  | -2.205172000 | -0.362901000 |
| C | 2.691964000  | -2.648466000 | 0.005201000  |
| C | 1.619702000  | -1.757473000 | 0.095318000  |
| H | 0.658380000  | -2.162652000 | 0.412076000  |
| H | 2.523925000  | -3.704492000 | 0.237933000  |
| H | 4.804723000  | -2.901493000 | -0.432250000 |
| H | 5.119636000  | -0.463351000 | -0.930808000 |
| H | 3.237029000  | 1.104856000  | -0.787315000 |
| N | -0.688799000 | -0.081805000 | 0.014865000  |
| C | -1.269065000 | -0.910411000 | -1.131956000 |
| C | -1.802329000 | 0.445895000  | -0.904651000 |
| H | -0.529957000 | -0.986733000 | -1.932793000 |
| C | -1.913889000 | -2.217750000 | -0.764210000 |
| C | -2.682360000 | -2.151600000 | 0.537110000  |
| O | -1.954540000 | -1.439600000 | 1.571218000  |
| C | -1.087140000 | -0.453522000 | 1.411871000  |
| O | -0.581602000 | 0.108252000  | 2.333073000  |
| H | -3.657518000 | -1.659853000 | 0.421617000  |
| H | -2.853146000 | -3.151673000 | 0.954445000  |
| H | -2.598953000 | -2.513127000 | -1.574263000 |
| H | -1.128559000 | -2.986292000 | -0.708087000 |
| H | -1.364566000 | 1.195522000  | -1.564257000 |
| C | -3.132850000 | 0.892671000  | -0.344856000 |
| H | -3.425767000 | 0.339608000  | 0.556775000  |
| H | -2.989922000 | 1.936625000  | -0.030990000 |
| C | -4.229306000 | 0.784210000  | -1.406594000 |

|   |              |              |              |
|---|--------------|--------------|--------------|
| H | -4.402185000 | -0.262995000 | -1.703856000 |
| H | -3.967779000 | 1.353756000  | -2.313239000 |
| H | -5.177797000 | 1.187344000  | -1.019723000 |

**TS5-b**

|                                              |             |
|----------------------------------------------|-------------|
| Sum of electronic and zero-point Energies=   | -975.730210 |
| Sum of electronic and thermal Energies=      | -975.710488 |
| Sum of electronic and thermal Enthalpies=    | -975.709544 |
| Sum of electronic and thermal Free Energies= | -975.778700 |

|   |              |              |              |
|---|--------------|--------------|--------------|
| C | 0.641612000  | 0.540081000  | 0.250896000  |
| C | 0.745170000  | 2.011796000  | 0.185683000  |
| O | -0.174796000 | 2.775896000  | 0.432561000  |
| O | 1.951773000  | 2.456152000  | -0.216573000 |
| C | 2.115609000  | 3.873048000  | -0.295133000 |
| H | 1.410776000  | 4.312030000  | -1.018921000 |
| H | 1.953089000  | 4.347510000  | 0.685666000  |
| H | 3.148230000  | 4.043358000  | -0.626187000 |
| C | 1.756665000  | -0.379412000 | -0.021164000 |
| C | 3.095765000  | -0.088687000 | 0.330587000  |
| C | 4.118774000  | -0.997824000 | 0.065871000  |
| C | 3.844976000  | -2.219005000 | -0.564037000 |
| C | 2.525890000  | -2.525896000 | -0.913386000 |
| C | 1.495788000  | -1.626119000 | -0.636004000 |
| H | 0.474240000  | -1.889196000 | -0.914168000 |
| H | 2.294332000  | -3.476002000 | -1.402630000 |
| H | 4.651689000  | -2.926880000 | -0.771516000 |
| H | 5.143205000  | -0.752339000 | 0.359239000  |
| H | 3.328779000  | 0.851024000  | 0.829067000  |
| N | -0.605134000 | 0.078953000  | 0.437084000  |
| C | -1.870245000 | -0.552620000 | -1.488093000 |
| C | -1.870648000 | 0.592834000  | -0.652058000 |
| H | -1.180283000 | -0.524319000 | -2.336701000 |
| C | -2.489701000 | -1.870935000 | -1.198564000 |
| C | -2.973631000 | -1.999592000 | 0.227614000  |
| O | -1.960099000 | -1.758902000 | 1.224723000  |
| C | -0.846621000 | -1.015212000 | 1.301291000  |
| O | -0.081741000 | -1.243916000 | 2.210047000  |
| H | -3.821601000 | -1.329077000 | 0.423094000  |
| H | -3.311557000 | -3.025282000 | 0.431772000  |
| H | -3.358689000 | -2.065398000 | -1.860229000 |
| H | -1.767443000 | -2.677038000 | -1.426936000 |
| H | -1.371766000 | 1.436032000  | -1.134372000 |
| C | -3.001619000 | 1.124556000  | 0.218686000  |
| H | -3.272172000 | 0.420549000  | 1.016148000  |
| H | -2.598902000 | 2.015183000  | 0.722258000  |
| C | -4.236480000 | 1.484793000  | -0.607981000 |
| H | -4.674094000 | 0.595252000  | -1.090284000 |
| H | -3.989292000 | 2.205981000  | -1.404691000 |
| H | -5.011536000 | 1.941257000  | 0.028480000  |

**Compound 5c**

|                                              |             |
|----------------------------------------------|-------------|
| Sum of electronic and zero-point Energies=   | -975.781350 |
| Sum of electronic and thermal Energies=      | -975.760305 |
| Sum of electronic and thermal Enthalpies=    | -975.759361 |
| Sum of electronic and thermal Free Energies= | -975.832745 |

|   |              |              |              |
|---|--------------|--------------|--------------|
| C | 0.614149000  | 0.324716000  | 0.594724000  |
| C | 0.306014000  | 1.818095000  | 0.633818000  |
| O | -0.270374000 | 2.375839000  | 1.533296000  |
| O | 0.715731000  | 2.401713000  | -0.493635000 |
| C | 0.390934000  | 3.791423000  | -0.655870000 |
| H | -0.699435000 | 3.937852000  | -0.624447000 |
| H | 0.858961000  | 4.392894000  | 0.137982000  |
| H | 0.785878000  | 4.083144000  | -1.636571000 |
| C | 1.977878000  | -0.110777000 | 0.211598000  |
| C | 3.078128000  | 0.707738000  | 0.533180000  |
| C | 4.376250000  | 0.299184000  | 0.225659000  |
| C | 4.591460000  | -0.920322000 | -0.426027000 |

|   |              |              |              |
|---|--------------|--------------|--------------|
| C | 3.503152000  | -1.732930000 | -0.764609000 |
| C | 2.205095000  | -1.335660000 | -0.443727000 |
| H | 1.369012000  | -1.975794000 | -0.728669000 |
| H | 3.665562000  | -2.680528000 | -1.283835000 |
| H | 5.607940000  | -1.235634000 | -0.675051000 |
| H | 5.222900000  | 0.936532000  | 0.492166000  |
| H | 2.920445000  | 1.662241000  | 1.041426000  |
| N | -0.398015000 | -0.400856000 | 0.858619000  |
| C | -2.103647000 | 0.595828000  | -1.488656000 |
| C | -3.007288000 | 0.843322000  | -0.527433000 |
| H | -1.852862000 | 1.443305000  | -2.140301000 |
| C | -1.335321000 | -0.641652000 | -1.882389000 |
| C | -1.632049000 | -2.017869000 | -1.292932000 |
| O | -1.154638000 | -2.427227000 | 0.021041000  |
| C | -0.466476000 | -1.778810000 | 0.967825000  |
| O | -0.063304000 | -2.380590000 | 1.937371000  |
| H | -2.717339000 | -2.196050000 | -1.273643000 |
| H | -1.189225000 | -2.769711000 | -1.962598000 |
| H | -1.523807000 | -0.790436000 | -2.962564000 |
| H | -0.254196000 | -0.426669000 | -1.839484000 |
| H | -3.407249000 | 1.866783000  | -0.502285000 |
| C | -3.563804000 | -0.040859000 | 0.553874000  |
| H | -3.126370000 | -1.045914000 | 0.531216000  |
| H | -3.262858000 | 0.393819000  | 1.524851000  |
| C | -5.093659000 | -0.142009000 | 0.501559000  |
| H | -5.429871000 | -0.616331000 | -0.435854000 |
| H | -5.565231000 | 0.853999000  | 0.557441000  |
| H | -5.480352000 | -0.741884000 | 1.341733000  |

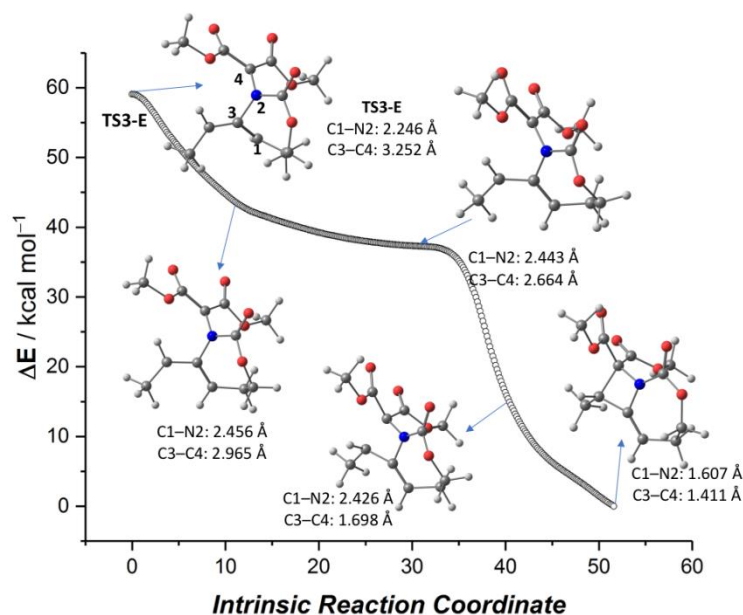

**Figure S9.** Computed intrinsic reaction coordinate (IRC) at the reference SCM(CH<sub>2</sub>Cl<sub>2</sub>)-B3LYP-D3/def2-SVP level for the transformation of **TS3-E** into **3bc'**.

## VII. Ring Strain Calculations

Ring strain energies estimates were performed via simple, gas-phase DFT calculations (B3LYP/6-311G\*) according to Dudev and Lim.<sup>10</sup> Thus, isodesmic equations using the strained molecule of interest plus a number of unstrained CH<sub>2</sub> groups (derived from geometry optimization of n-hexane) were balanced against an unstrained, ring-expanded variant as per equations 1 and 2.

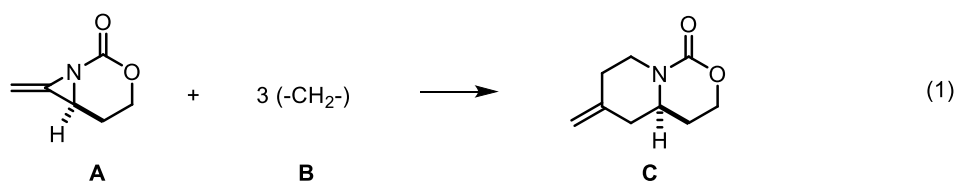

$$\text{strain energy (B3LYP/6-311G}^*) = A + B - C = 44.2 \text{ kcal/mol}$$

The B3LYP energy of the right side of the equation was subtracted from the combined B3LYP energies of the strained molecule and requisite number of methylene groups yielding an estimate of the additional ring strain present in the aziridines. For the ring expanded piperidine in equation 1, several vinyl isomers were evaluated and the 4-vinyl isomer was chosen as the equatorial vinyl group at the 4 position is the lowest energy isomer (higher energy isomers with interactions between the vinyl group and the carbamate ring thus underestimate the strain associate with **A**).

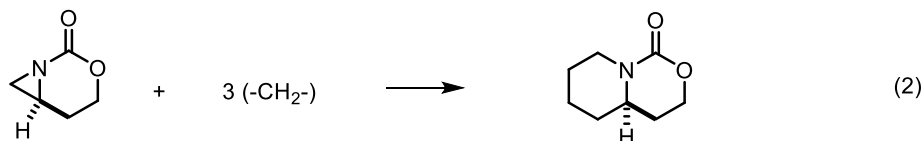

$$\text{strain energy (B3LYP/6-311G}^*): 39.7 \text{ kcal/mol}$$

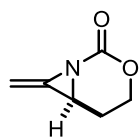

$$\text{B3LYP energy} = -438.079668341$$



|   |             |             |             |
|---|-------------|-------------|-------------|
| C | 0.00000000  | 0.00000000  | 0.00000000  |
| N | -0.71214400 | -1.32617100 | 0.06654800  |
| C | -1.97782800 | -1.47203100 | 0.71090000  |
| O | -2.54872200 | -0.33266100 | 1.18352000  |
| C | -1.67789800 | 0.70510400  | 1.68741900  |
| H | -1.14863100 | 0.31904000  | 2.56312800  |
| H | -2.34854300 | 1.49854700  | 2.01192300  |
| C | -0.70593700 | 1.18509600  | 0.62004000  |
| H | 0.01041700  | 1.89027100  | 1.05376400  |
| H | -1.25766600 | 1.71636400  | -0.16140600 |
| O | -2.53795600 | -2.52295700 | 0.77700200  |
| C | 0.46870500  | -1.12453200 | 0.79841700  |
| C | 1.26990100  | -1.69877000 | 1.67545700  |
| H | 1.06854800  | -2.69579500 | 2.05014400  |
| H | 2.15766300  | -1.18733700 | 2.02737500  |
| H | 0.44420900  | 0.16398100  | -0.97866200 |

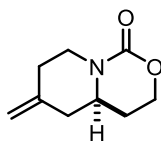

B3LYP energy = -556.115511734

|   |             |             |             |
|---|-------------|-------------|-------------|
| C | 0.00000000  | 0.00000000  | 0.00000000  |
| N | -0.46854200 | 1.35623300  | -0.32475300 |
| C | -1.76762100 | 1.73116200  | -0.59086900 |
| O | -2.64775400 | 0.72326800  | -0.85635000 |
| C | -2.12285500 | -0.57453800 | -1.16136300 |
| H | -1.64388000 | -0.54833300 | -2.14702200 |
| H | -2.99204900 | -1.22908900 | -1.22228500 |
| C | -1.15567500 | -1.00014900 | -0.07458600 |
| H | -0.77312200 | -2.00802000 | -0.26063200 |
| H | -1.69634800 | -1.02560800 | 0.87580500  |
| O | -2.15314500 | 2.87524900  | -0.61379700 |
| C | 0.54199100  | 2.40024900  | -0.16504300 |
| C | 1.74787800  | 2.10829900  | -1.07438400 |
| C | 2.26023300  | 0.70479600  | -0.85588600 |
| C | 1.18918800  | -0.35946300 | -0.91826400 |
| H | 0.81950900  | -0.45754000 | -1.94771400 |
| H | 1.59581300  | -1.33076800 | -0.62104000 |
| C | 3.53292900  | 0.42822100  | -0.57567500 |
| H | 4.28617500  | 1.20812300  | -0.51703500 |
| H | 3.87417500  | -0.58863100 | -0.40521300 |
| H | 1.42417000  | 2.22724200  | -2.11644800 |
| H | 2.53734600  | 2.84283200  | -0.89238600 |
| H | 0.07818700  | 3.35352300  | -0.40526100 |
| H | 0.86603900  | 2.43735100  | 0.88366300  |
| H | 0.38303800  | 0.02367900  | 1.02977300  |

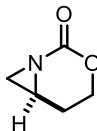

B3LYP energy = -399.995938255

|   |             |             |             |
|---|-------------|-------------|-------------|
| C | 0.00000000  | 0.00000000  | 0.00000000  |
| N | 1.45731900  | 0.17145000  | -0.00328400 |
| C | 2.32538700  | -0.91355300 | 0.27155000  |
| O | 1.77015600  | -2.16347800 | 0.29072900  |
| C | 0.45726100  | -2.28993100 | 0.87059100  |
| H | 0.52421900  | -2.06579800 | 1.94072800  |
| H | 0.20195200  | -3.34369000 | 0.76967800  |
| C | -0.55481000 | -1.39595800 | 0.16914000  |
| H | -1.50002600 | -1.38748400 | 0.72219400  |
| H | -0.76446900 | -1.80666600 | -0.82326400 |
| O | 3.50469800  | -0.77114700 | 0.40497700  |
| C | 0.67037600  | 0.75671000  | 1.09477000  |
| H | 0.75154100  | 0.29543900  | 2.07498200  |
| H | 0.63888500  | 1.84104500  | 1.10884000  |
| H | -0.47796000 | 0.59255700  | -0.77612700 |

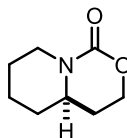

B3LYP energy = -518.024518653

|   |             |             |             |
|---|-------------|-------------|-------------|
| C | 0.00000000  | 0.00000000  | 0.00000000  |
| N | -0.29582200 | 1.39865300  | -0.36109800 |
| C | -1.54387700 | 1.92753500  | -0.60498700 |
| O | -2.53872200 | 1.03155600  | -0.87003400 |
| C | -2.16597500 | -0.31584100 | -1.18168500 |
| H | -1.67484900 | -0.33874100 | -2.16126100 |
| H | -3.10462800 | -0.86458100 | -1.25606800 |
| C | -1.26656600 | -0.85697500 | -0.08866500 |
| H | -1.00268600 | -1.90186700 | -0.27653100 |
| H | -1.81709900 | -0.82288700 | 0.85581900  |
| O | -1.79336900 | 3.10931200  | -0.61806000 |
| C | 0.83036500  | 2.32000600  | -0.19740400 |
| H | 1.12528200  | 2.34731000  | 0.86195100  |
| H | 0.48519900  | 3.31538000  | -0.46559100 |
| C | 2.01007800  | 1.86824600  | -1.06171600 |
| C | 2.38157800  | 0.40811300  | -0.77280700 |
| C | 1.15788100  | -0.51286800 | -0.87225600 |
| H | 0.82225000  | -0.57982900 | -1.91410600 |
| H | 1.42189800  | -1.52744100 | -0.55354000 |
| H | 3.16659800  | 0.06874400  | -1.45565000 |
| H | 2.80168600  | 0.33558400  | 0.23904800  |
| H | 1.73773600  | 1.98240400  | -2.11718000 |
| H | 2.86784300  | 2.52441000  | -0.88102900 |

H 0.35119300 0.00198400 1.04300700

## VIII. Crystallographic Information for (S,S)-**3bb**.

### *Data Collection*

The deposition number for (S,S)-**3bb** is CCDC 183870.

A colorless crystal with approximate dimensions 0.064 x 0.048 x 0.027 mm<sup>3</sup> was selected under oil under ambient conditions and attached to the tip of a MiTeGen MicroMount©. The crystal was mounted in a stream of cold nitrogen at 100(1) K and centered in the X-ray beam by using a video camera.

The crystal evaluation and data collection were performed on a Bruker Quazar SMART APEXII diffractometer with Mo K<sub>α</sub> ( $\lambda = 0.71073 \text{ \AA}$ ) radiation and the diffractometer to crystal distance of 4.96 cm.<sup>11</sup>

The initial cell constants were obtained from three series of  $\omega$  scans at different starting angles. Each series consisted of 12 frames collected at intervals of 0.5° in a 6° range about  $\omega$  with the exposure time of 20 seconds per frame. The reflections were successfully indexed by an automated indexing routine built in the APEXII program suite. The final cell constants were calculated from a set of 4481 strong reflections from the actual data collection.

The data were collected by using the full sphere data collection routine to survey the reciprocal space to the extent of a full sphere to a resolution of 0.75 Å. A total of 16434 data were harvested by collecting 4 sets of frames with 0.6° scans in  $\omega$  and  $\phi$  with exposure times of 150 sec per frame. These highly redundant datasets were corrected for Lorentz and polarization effects. The absorption correction was based on fitting a function to the empirical transmission surface as sampled by multiple equivalent measurements.<sup>12</sup>

## Structure Solution and Refinement

The systematic absences in the diffraction data were consistent for the space groups  $P2_1$  and  $P2_1/m$ . The  $E$ -statistics strongly suggested the non-centrosymmetric space group  $P2_1$  that yielded chemically reasonable and computationally stable results of refinement.<sup>13-18</sup>

A successful solution by the direct methods provided most non-hydrogen atoms from the  $E$ -map. The remaining non-hydrogen atoms were located in an alternating series of least-squares cycles and difference Fourier maps. All non-hydrogen atoms were refined with anisotropic displacement coefficients. All hydrogen atoms were included in the structure factor calculation at idealized positions and were allowed to ride on the neighboring atoms with relative isotropic displacement coefficients.

The absolute configuration was unambiguously established by anomalous dispersion: C1 –  $S$ ; C2 –  $S$ .

The final least-squares refinement of 237 parameters against 4616 data resulted in residuals  $R$  (based on  $F^2$  for  $I \geq 2\sigma$ ) and  $wR$  (based on  $F^2$  for all data) of 0.0362 and 0.0809, respectively. The final difference Fourier map was featureless.

## Summary

**Crystal Data** for  $C_{20}H_{24}ClNO_4$  ( $M = 377.85$  g/mol): monoclinic, space group  $P2_1$  (no. 4),  $a = 7.421(3)$  Å,  $b = 16.048(6)$  Å,  $c = 8.176(3)$  Å,  $\beta = 101.174(11)^\circ$ ,  $V = 955.3(6)$  Å<sup>3</sup>,  $Z = 2$ ,  $T = 100.0$  K,  $\mu(\text{MoK}\alpha) = 0.225$  mm<sup>-1</sup>,  $D_{\text{calc}} = 1.314$  g/cm<sup>3</sup>, 16434 reflections measured ( $5.076^\circ \leq 2\Theta \leq 56.632^\circ$ ), 4616 unique ( $R_{\text{int}} = 0.0422$ ,  $R_{\text{sigma}} = 0.0496$ ) which were used in all calculations. The final  $R_1$  was 0.0362 ( $I > 2\sigma(I)$ ) and  $wR_2$  was 0.0809 (all data).

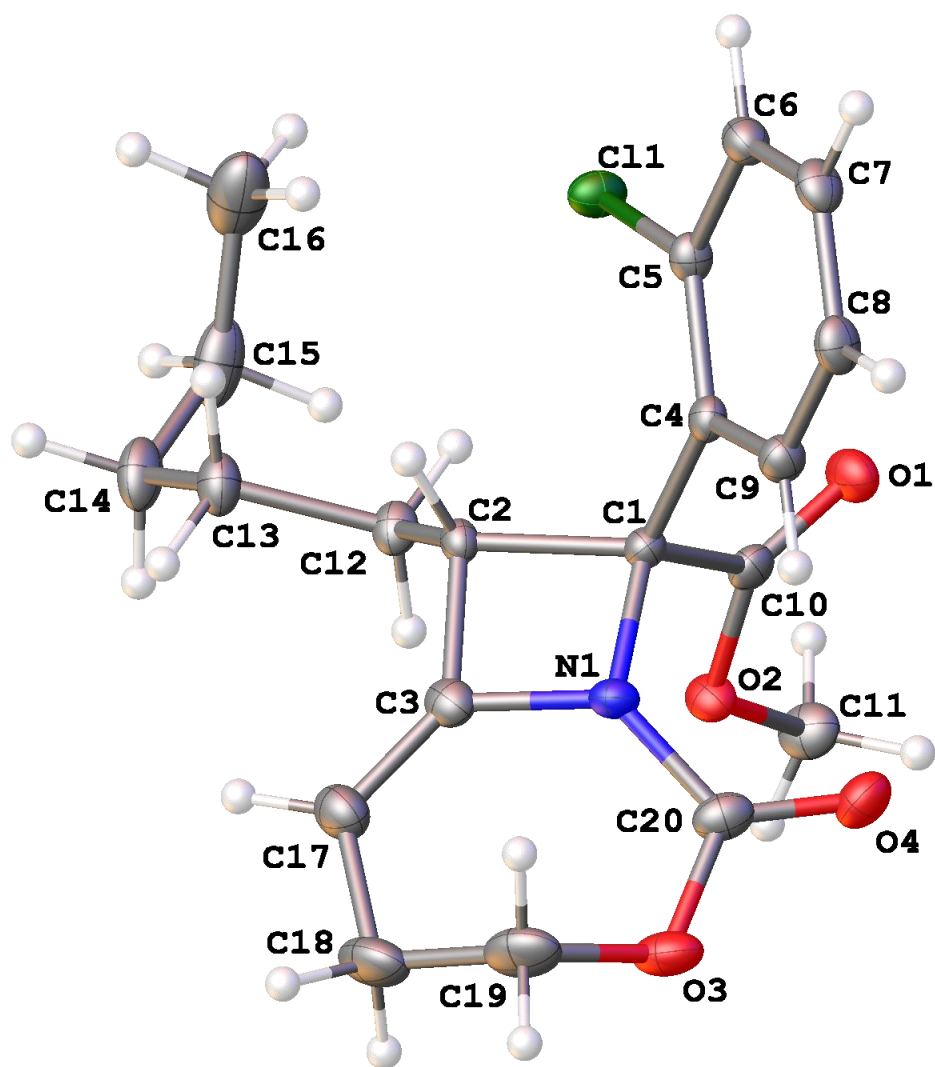

**Figure S10.** A molecular drawing of (*S,S*)-**3bb** shown with 50% probability ellipsoids.

**Table S1. Crystal data and structure refinement for (S,S)-3bb.**

|                                             |                                                               |
|---------------------------------------------|---------------------------------------------------------------|
| Identification code                         | Schomaker81                                                   |
| Empirical formula                           | C <sub>20</sub> H <sub>24</sub> ClNO <sub>4</sub>             |
| Formula weight                              | 377.85                                                        |
| Temperature/K                               | 100.0                                                         |
| Crystal system                              | monoclinic                                                    |
| Space group                                 | P2 <sub>1</sub>                                               |
| a/Å                                         | 7.421(3)                                                      |
| b/Å                                         | 16.048(6)                                                     |
| c/Å                                         | 8.176(3)                                                      |
| α/°                                         | 90                                                            |
| β/°                                         | 101.174(11)                                                   |
| γ/°                                         | 90                                                            |
| Volume/Å <sup>3</sup>                       | 955.3(6)                                                      |
| Z                                           | 2                                                             |
| ρ <sub>calc</sub> /cm <sup>3</sup>          | 1.314                                                         |
| μ/mm <sup>-1</sup>                          | 0.225                                                         |
| F(000)                                      | 400.0                                                         |
| Crystal size/mm <sup>3</sup>                | 0.064 × 0.048 × 0.027                                         |
| Radiation                                   | MoKα (λ = 0.71073)                                            |
| 2θ range for data collection/°              | 5.076 to 56.632                                               |
| Index ranges                                | -9 ≤ h ≤ 9, -21 ≤ k ≤ 20, -10 ≤ l ≤ 10                        |
| Reflections collected                       | 16434                                                         |
| Independent reflections                     | 4616 [R <sub>int</sub> = 0.0422, R <sub>sigma</sub> = 0.0496] |
| Data/restraints/parameters                  | 4616/1/237                                                    |
| Goodness-of-fit on F <sup>2</sup>           | 1.027                                                         |
| Final R indexes [I ≥ 2σ (I)]                | R <sub>1</sub> = 0.0362, wR <sub>2</sub> = 0.0774             |
| Final R indexes [all data]                  | R <sub>1</sub> = 0.0472, wR <sub>2</sub> = 0.0809             |
| Largest diff. peak/hole / e Å <sup>-3</sup> | 0.26/-0.20                                                    |
| Flack parameter                             | -0.04(3)                                                      |

**Table S2. Fractional Atomic Coordinates ( $\times 10^4$ ) and Equivalent Isotropic Displacement Parameters ( $\text{\AA}^2 \times 10^3$ ) for (*S,S*)-3bb.  $U_{\text{eq}}$  is defined as 1/3 of the trace of the orthogonalised  $U_{\text{IJ}}$  tensor.**

| Atom | <i>x</i>  | <i>y</i>   | <i>z</i>  | $U(\text{eq})$ |
|------|-----------|------------|-----------|----------------|
| Cl1  | 3606.3(8) | 6441.1(4)  | 8596.7(7) | 20.52(15)      |
| O1   | 4001(3)   | 4468.5(11) | 9714(2)   | 23.4(4)        |
| O2   | 3913(2)   | 3721.8(11) | 7372(2)   | 18.4(4)        |
| O3   | -1179(3)  | 3003.9(12) | 5391(2)   | 28.1(5)        |
| O4   | 243(3)    | 3186.5(12) | 8027(2)   | 25.5(4)        |
| N1   | 374(3)    | 4230.5(13) | 6182(2)   | 17.0(4)        |
| C1   | 1682(3)   | 4780.9(15) | 7268(3)   | 14.8(5)        |
| C2   | 2070(3)   | 5201.9(15) | 5604(3)   | 14.3(5)        |
| C3   | 779(4)    | 4548.9(17) | 4670(3)   | 18.9(5)        |
| C4   | 765(3)    | 5339.8(16) | 8365(3)   | 15.3(5)        |
| C5   | 1509(3)   | 6096.5(16) | 9009(3)   | 16.1(5)        |
| C6   | 635(4)    | 6608.2(16) | 9981(3)   | 19.5(6)        |
| C7   | -1049(3)  | 6362.5(19) | 10318(3)  | 20.2(5)        |
| C8   | -1833(4)  | 5618.0(17) | 9703(3)   | 20.0(6)        |
| C9   | -933(4)   | 5119.1(16) | 8739(3)   | 18.5(5)        |
| C10  | 3313(3)   | 4312.3(16) | 8295(3)   | 16.9(5)        |
| C11  | 5400(4)   | 3214.4(18) | 8253(3)   | 24.5(6)        |
| C12  | 3979(4)   | 5251.5(17) | 5217(3)   | 18.7(5)        |
| C13  | 4001(4)   | 5861.3(19) | 3782(3)   | 22.8(6)        |
| C14  | 5847(4)   | 5935(2)    | 3241(3)   | 27.2(7)        |
| C15  | 7447(4)   | 6165(2)    | 4613(4)   | 34.5(8)        |
| C16  | 7196(5)   | 6955(2)    | 5540(4)   | 43.7(9)        |
| C17  | 206(4)    | 4311.1(18) | 3115(3)   | 26.2(6)        |
| C18  | -1188(4)  | 3630(2)    | 2619(4)   | 34.6(7)        |
| C19  | -2258(4)  | 3428(2)    | 3959(4)   | 32.4(7)        |
| C20  | -148(4)   | 3455.3(17) | 6618(3)   | 21.3(6)        |



**Table S3. Anisotropic Displacement Parameters ( $\text{\AA}^2 \times 10^3$ ) for (S,S)-3bb. The Anisotropic displacement factor exponent takes the form:  $-2\pi^2[h^2a^{*2}U_{11}+2hka^*b^*U_{12}+\dots]$ .**

| Atom | $U_{11}$ | $U_{22}$ | $U_{33}$ | $U_{23}$ | $U_{13}$  | $U_{12}$  |
|------|----------|----------|----------|----------|-----------|-----------|
| Cl1  | 17.0(3)  | 19.0(3)  | 26.7(3)  | -3.9(3)  | 7.3(2)    | -2.7(3)   |
| O1   | 25.2(10) | 23.6(11) | 18.5(9)  | -0.2(8)  | -2.7(7)   | 2.7(8)    |
| O2   | 18.4(9)  | 17.0(9)  | 19.3(9)  | -0.3(7)  | 2.3(7)    | 5.4(7)    |
| O3   | 28.1(12) | 17.9(10) | 35.6(11) | -6.4(8)  | -0.5(9)   | -1.5(9)   |
| O4   | 26.7(11) | 19.6(10) | 30(1)    | 4.8(8)   | 5.3(8)    | -3.2(8)   |
| N1   | 17.9(11) | 14.2(11) | 18.2(10) | -3.2(8)  | 2.1(8)    | -1.0(9)   |
| C1   | 16.5(13) | 13.1(12) | 14.8(11) | 0.3(9)   | 2.8(9)    | -0.7(10)  |
| C2   | 16.3(12) | 14.6(13) | 12.2(11) | 1.4(9)   | 2.9(9)    | 2.5(10)   |
| C3   | 19.3(13) | 17.4(13) | 19.0(12) | 0.2(10)  | 1.4(10)   | 4.8(11)   |
| C4   | 16.7(13) | 15.3(13) | 13.6(11) | 3.1(9)   | 2.5(9)    | 1.3(10)   |
| C5   | 12.9(12) | 19.7(13) | 15.6(11) | 1.8(9)   | 2.8(9)    | -0.7(10)  |
| C6   | 22.9(13) | 18.9(15) | 16.5(11) | -0.6(9)  | 3.3(9)    | 1.9(10)   |
| C7   | 21.1(13) | 23.9(14) | 17.0(11) | 0.4(11)  | 7.1(9)    | 5.5(12)   |
| C8   | 16.5(13) | 26.8(16) | 18.1(12) | 2.7(10)  | 6.7(10)   | -0.3(11)  |
| C9   | 18.9(14) | 18.5(14) | 17.9(12) | 0.6(10)  | 3.3(10)   | -2.4(11)  |
| C10  | 17.3(13) | 14.3(13) | 19.6(12) | 1.9(9)   | 5.0(9)    | -2.7(10)  |
| C11  | 19.7(15) | 22.2(15) | 29.1(14) | 1.7(11)  | -1.0(11)  | 5.3(11)   |
| C12  | 18.3(13) | 19.6(14) | 19.0(12) | 3.5(10)  | 5.4(9)    | 5.2(11)   |
| C13  | 23.1(15) | 27.1(15) | 18.8(13) | 6.5(10)  | 5.7(11)   | 4.2(12)   |
| C14  | 27.2(16) | 34.0(17) | 23.9(14) | 10.3(12) | 13.5(11)  | 8.4(13)   |
| C15  | 19.1(15) | 50(2)    | 36.5(16) | 22.4(14) | 9.8(12)   | 4.2(13)   |
| C16  | 35(2)    | 53(2)    | 38.5(18) | 15.4(16) | -5.9(15)  | -17.6(17) |
| C17  | 30.5(17) | 25.8(16) | 20.4(13) | -1.2(11) | 0.1(11)   | 2.3(13)   |
| C18  | 42.2(19) | 27.2(17) | 27.8(15) | -8.6(12) | -9.8(13)  | 0.3(15)   |
| C19  | 26.5(16) | 25.6(17) | 38.5(16) | -7.9(13) | -10.2(13) | -3.8(13)  |
| C20  | 16.5(14) | 17.4(14) | 30.2(14) | -1.9(11) | 4.5(11)   | -0.7(11)  |

**Table S4. Bond Lengths for (S,S)-3bb.**

| Atom | Atom | Length/Å | Atom | Atom | Length/Å |
|------|------|----------|------|------|----------|
| C11  | C5   | 1.745(3) | C2   | C12  | 1.512(4) |
| O1   | C10  | 1.200(3) | C3   | C17  | 1.316(3) |
| O2   | C10  | 1.340(3) | C4   | C5   | 1.394(4) |
| O2   | C11  | 1.446(3) | C4   | C9   | 1.399(4) |
| O3   | C19  | 1.453(3) | C5   | C6   | 1.388(3) |
| O3   | C20  | 1.349(3) | C6   | C7   | 1.388(4) |
| O4   | C20  | 1.211(3) | C7   | C8   | 1.381(4) |
| N1   | C1   | 1.476(3) | C8   | C9   | 1.383(3) |
| N1   | C3   | 1.423(3) | C12  | C13  | 1.530(3) |
| N1   | C20  | 1.371(4) | C13  | C14  | 1.523(4) |
| C1   | C2   | 1.595(3) | C14  | C15  | 1.513(4) |
| C1   | C4   | 1.519(3) | C15  | C16  | 1.507(5) |
| C1   | C10  | 1.530(3) | C17  | C18  | 1.506(4) |
| C2   | C3   | 1.522(4) | C18  | C19  | 1.507(5) |

**Table S5. Bond Angles for (S,S)-3bb.**

| Atom | Atom | Atom | Angle/°    | Atom | Atom | Atom | Angle/°    |
|------|------|------|------------|------|------|------|------------|
| C10  | O2   | C11  | 115.00(19) | C4   | C5   | C11  | 120.38(19) |
| C20  | O3   | C19  | 119.5(2)   | C6   | C5   | C11  | 117.1(2)   |
| C3   | N1   | C1   | 94.78(19)  | C6   | C5   | C4   | 122.5(2)   |
| C20  | N1   | C1   | 124.9(2)   | C5   | C6   | C7   | 119.0(2)   |
| C20  | N1   | C3   | 132.1(2)   | C8   | C7   | C6   | 120.4(2)   |
| N1   | C1   | C2   | 86.92(16)  | C7   | C8   | C9   | 119.5(2)   |
| N1   | C1   | C4   | 113.0(2)   | C8   | C9   | C4   | 122.2(2)   |
| N1   | C1   | C10  | 113.2(2)   | O1   | C10  | O2   | 124.5(2)   |
| C4   | C1   | C2   | 115.42(19) | O1   | C10  | C1   | 124.8(2)   |
| C4   | C1   | C10  | 111.30(19) | O2   | C10  | C1   | 110.64(19) |
| C10  | C1   | C2   | 115.0(2)   | C2   | C12  | C13  | 110.1(2)   |
| C3   | C2   | C1   | 86.35(17)  | C14  | C13  | C12  | 114.6(2)   |
| C12  | C2   | C1   | 122.2(2)   | C15  | C14  | C13  | 115.1(2)   |
| C12  | C2   | C3   | 117.1(2)   | C16  | C15  | C14  | 115.0(3)   |
| N1   | C3   | C2   | 91.69(18)  | C3   | C17  | C18  | 123.2(3)   |
| C17  | C3   | N1   | 130.7(3)   | C17  | C18  | C19  | 113.1(2)   |
| C17  | C3   | C2   | 137.6(3)   | O3   | C19  | C18  | 113.6(3)   |
| C5   | C4   | C1   | 123.2(2)   | O3   | C20  | N1   | 116.2(2)   |
| C5   | C4   | C9   | 116.5(2)   | O4   | C20  | O3   | 120.9(3)   |
| C9   | C4   | C1   | 120.3(2)   | O4   | C20  | N1   | 122.9(2)   |

**Table S6. Torsion Angles for (S,S)-3bb.**

| <b>A</b> | <b>B</b> | <b>C</b> | <b>D</b> | <b>Angle/°</b> | <b>A</b> | <b>B</b> | <b>C</b> | <b>D</b> | <b>Angle/°</b> |
|----------|----------|----------|----------|----------------|----------|----------|----------|----------|----------------|
| C11      | C5       | C6       | C7       | 179.10(18)     | C4       | C1       | C2       | C3       | -117.8(2)      |
| N1       | C1       | C2       | C3       | -3.66(18)      | C4       | C1       | C2       | C12      | 122.3(3)       |
| N1       | C1       | C2       | C12      | -123.6(2)      | C4       | C1       | C10O1    |          | -12.7(3)       |
| N1       | C1       | C4       | C5       | -155.4(2)      | C4       | C1       | C10O2    |          | 169.6(2)       |
| N1       | C1       | C4       | C9       | 22.6(3)        | C4       | C5       | C6       | C7       | -0.5(4)        |
| N1       | C1       | C10O1    |          | -141.4(3)      | C5       | C4       | C9       | C8       | -0.4(3)        |
| N1       | C1       | C10O2    |          | 41.0(3)        | C5       | C6       | C7       | C8       | 0.4(4)         |
| N1       | C3       | C17      | C18      | 4.0(5)         | C6       | C7       | C8       | C9       | -0.3(4)        |
| C1       | N1       | C3       | C2       | -4.1(2)        | C7       | C8       | C9       | C4       | 0.3(4)         |
| C1       | N1       | C3       | C17      | 174.7(3)       | C9       | C4       | C5       | C11      | -179.09(18)    |
| C1       | N1       | C20O3    |          | -172.1(2)      | C9       | C4       | C5       | C6       | 0.5(3)         |
| C1       | N1       | C20O4    |          | 9.6(4)         | C10C1    | C2       | C3       |          | 110.6(2)       |
| C1       | C2       | C3       | N1       | 3.79(18)       | C10C1    | C2       | C12      |          | -9.3(3)        |
| C1       | C2       | C3       | C17      | -174.9(3)      | C10C1    | C4       | C5       |          | 75.8(3)        |
| C1       | C2       | C12      | C13      | -166.4(2)      | C10C1    | C4       | C9       |          | -106.1(3)      |
| C1       | C4       | C5       | C11      | -0.9(3)        | C11O2    | C10O1    |          |          | 5.2(4)         |
| C1       | C4       | C5       | C6       | 178.6(2)       | C11O2    | C10C1    |          |          | -177.1(2)      |
| C1       | C4       | C9       | C8       | -178.6(2)      | C12C2    | C3       | N1       |          | 128.3(2)       |
| C2       | C1       | C4       | C5       | -57.6(3)       | C12C2    | C3       | C17      |          | -50.4(4)       |
| C2       | C1       | C4       | C9       | 120.5(2)       | C12C13   | C14      | C15      |          | -55.6(4)       |
| C2       | C1       | C10O1    |          | 120.9(3)       | C13C14   | C15      | C16      |          | -55.4(4)       |
| C2       | C1       | C10O2    |          | -56.8(3)       | C17C18   | C19      | O3       |          | -70.8(3)       |
| C2       | C3       | C17      | C18      | -177.7(3)      | C19O3    | C20O4    |          |          | 154.3(3)       |
| C2       | C12      | C13      | C14      | -177.8(2)      | C19O3    | C20N1    |          |          | -24.0(4)       |
| C3       | N1       | C1       | C2       | 3.92(19)       | C20O3    | C19      | C18      |          | 84.6(3)        |
| C3       | N1       | C1       | C4       | 120.3(2)       | C20N1    | C1       | C2       |          | 155.4(2)       |
| C3       | N1       | C1       | C10      | -112.0(2)      | C20N1    | C1       | C4       |          | -88.2(3)       |
| C3       | N1       | C20O3    |          | -32.0(4)       | C20N1    | C1       | C10      |          | 39.5(3)        |
| C3       | N1       | C20O4    |          | 149.7(3)       | C20N1    | C3       | C2       |          | -152.3(3)      |
| C3       | C2       | C12      | C13      | 89.9(3)        | C20N1    | C3       | C17      |          | 26.6(5)        |
| C3       | C17      | C18      | C19      | 17.0(4)        |          |          |          |          |                |

**Table S7. Hydrogen Atom Coordinates ( $\text{\AA}\times 10^4$ ) and Isotropic Displacement Parameters ( $\text{\AA}^2\times 10^3$ ) for (S,S)-3bb.**

| Atom | x        | y       | z        | U(eq) |
|------|----------|---------|----------|-------|
| H2   | 1473.19  | 5762.74 | 5453.47  | 17    |
| H6   | 1181.25  | 7118.62 | 10408.87 | 23    |
| H7   | -1665.36 | 6708.6  | 10976.59 | 24    |
| H8   | -2982.65 | 5449.54 | 9939.88  | 24    |
| H9   | -1487.48 | 4609.45 | 8315.91  | 22    |
| H11A | 5805.76  | 2827.13 | 7470.58  | 37    |
| H11B | 4975.34  | 2898.44 | 9131.3   | 37    |
| H11C | 6427.64  | 3573.82 | 8753.18  | 37    |
| H12A | 4365.6   | 4692.42 | 4905.85  | 22    |
| H12B | 4857.11  | 5439.64 | 6218.35  | 22    |
| H13A | 3066.61  | 5682.16 | 2810.87  | 27    |
| H13B | 3638.87  | 6419.22 | 4121.94  | 27    |
| H14A | 6123.68  | 5396.16 | 2754.89  | 33    |
| H14B | 5737.81  | 6360.59 | 2351.04  | 33    |
| H15A | 7669.53  | 5700.86 | 5423.73  | 41    |
| H15B | 8557.66  | 6224.77 | 4119.8   | 41    |
| H16A | 7018.78  | 7425.09 | 4759.02  | 66    |
| H16B | 8288.95  | 7054.33 | 6404.45  | 66    |
| H16C | 6117.46  | 6900.79 | 6059.17  | 66    |
| H17  | 696.41   | 4582.08 | 2265.12  | 31    |
| H18A | -550.19  | 3121.17 | 2351.3   | 42    |
| H18B | -2056.31 | 3802.83 | 1598.17  | 42    |
| H19A | -2747.22 | 3952.12 | 4340.41  | 39    |
| H19B | -3317.55 | 3072.51 | 3475.32  | 39    |

## IX. References

1. (a) Armarego, W. L. F.; Chai, C. L. L. *Purification of Laboratory Chemicals*, Elsevier: Burlington, MA, 6th ed., 2009. (b) Still, W. C.; Kahn, M.; Mitra, A. Rapid Chromatographic Technique for Preparative Separations with Moderate Resolution. *J. Org. Chem.* **1978**, *43*, 2923-2925.
2. (a) Boralsky, L. A.; Marston, D.; Grigg, R. D.; Hershberger, J. C.; Schomaker, J. M. Allene Functionalization via Bicyclic Methylene Aziridines. *Org. Lett.* **2011**, *13*, 1924-1927. (b) Adams, C. S.; Boralsky, L. A.; Guzei, I. A.; Schomaker, J. M. Modular Functionalization of Allenes to Aminated Stereotriads. *J. Am. Chem. Soc.* **2012**, *134*, 10807-10810. (c) Ju,

- M.; Weatherly, C. D.; Guzei, I. E.; Schomaker, J. M. Chemo- and Enantioselective Intramolecular Silver-Catalyzed Aziridinations. *Angew. Chem. Int. Ed.* **2017**, *56*, 9944-9948.
- Schmid, S. C.; Schomaker, J. M. A Stereoselective [3+ 1] Ring Expansion for the Synthesis of Highly Substituted Methylene Azetidines. *Angew. Chem. Int. Ed.* **2017**, *56*, 12229-12233.
  - Gaussian 09, Revision D.01, Frisch, M. J.; Trucks, G. W.; Schlegel, H. B.; Scuseria, G. E.; Robb, M. A.; Cheeseman, J. R.; Scalmani, G.; Barone, V.; Mennucci, B.; Petersson, G. A.; Nakatsuji, H.; Caricato, M.; Li, X.; Hratchian, H. P.; Izmaylov, A. F.; Bloino, J.; Zheng, G.; Sonnenberg, J. L.; Hada, M.; Ehara, M.; Toyota, K.; Fukuda, R.; Hasegawa, J.; Ishida, M.; Nakajima, T.; Honda, Y.; Kitao, O.; Nakai, H.; Vreven, T.; Montgomery, J. A., Jr.; Peralta, J. E.; Ogliaro, F.; Bearpark, M.; Heyd, J. J.; Brothers, E.; Kudin, K. N.; Staroverov, V. N.; Kobayashi, R.; Normand, J.; Raghavachari, K.; Rendell, A.; Burant, J. C.; Iyengar, S. S.; Tomasi, J.; Cossi, M.; Rega, N.; Millam, J. M.; Klene, M.; Knox, J. E.; Cross, J. B.; Bakken, V.; Adamo, C.; Jaramillo, J.; Gomperts, R.; Stratmann, R. E.; Yazyev, O.; Austin, A. J.; Cammi, R.; Pomelli, C.; Ochterski, J. W.; Martin, R. L.; Morokuma, K.; Zakrzewski, V. G.; Voth, G. A.; Salvador, P.; Dannenberg, J. J.; Dapprich, S.; Daniels, A. D.; Farkas, Ö.; Foresman, J. B.; Ortiz, J. V.; Cioslowski, J.; Fox, D. J. Gaussian, Inc., Wallingford CT, 2009.
  - (a) Becke, A. D. Density-functional Thermochemistry. III. The Role of Exact Exchange. *J. Chem. Phys.* **1993**, *98*, 5648-5652. (b) Lee, C.; Yang, W.; Parr, R. G. Development of the Colle-Salvetti Correlation-Energy Formula into a Functional of the Electron Density. *Phys. Rev. B* **1998**, *37*, 785-789. (c) Vosko, S. H.; Wilk, L.; Nusair, M. Accurate Spin-Dependent Electron Liquid Correlation Energies for Local Spin Density Calculations: A Critical Analysis. *Can. J. Phys.* **1980**, *58*, 1200-1211.
  - Grimme, S.; Antony, J.; Ehrlich, S.; Krieg, H. A Consistent and Accurate *Ab Initio* Parametrization of Density Functional Dispersion Correction (DFT-D) for the 94 Elements H-Pu. *J. Chem. Phys.* **2010**, *132*, 154104.
  - Weigend, F.; Ahlrichs, R. Balanced Basis Sets of Split Valence, Triple Zeta Valence and Quadruple Zeta Valence Quality for H to Rn: Design and Assessment of Accuracy. *Phys. Chem. Chem. Phys.* **2005**, *7*, 3297-3305.

8. McIver, J. W.; Komornicki, A. K. Structure of Transition States in Organic Reactions. General Theory and an Application to the Cyclobutene-Butadiene Isomerization Using a Semiempirical Molecular Orbital Method. *J. Am. Chem. Soc.* **1972**, *94*, 2625-2633.
9. González, C.; Schlegel, H. B. Reaction Path Following in Mass-Weighted Internal Coordinates. *J. Phys. Chem.* **1990**, *94*, 5523-5527.
10. Dudev, T.; Lim, C. Ring Strain Energies from *Ab Initio* Calculations. *J. Am. Chem. Soc.* **1998**, *120*, 4450-4458.
11. Bruker-AXS *APEX3*. Version 2016.5-0. Madison, Wisconsin, USA, 2016.
12. Krause, L.; Herbst-Irmer, R.; Sheldrick, G. M.; Stalke, D. Comparison of Silver and Molybdenum Microfocus X-ray Sources for Single-crystal Structure Determination. *J. Appl. Cryst.* **2015**, *48*, 3-10.
13. Sheldrick, G. M. *XPREP*. Version 2013/1. Georg-August-Universität Göttingen, Göttingen, Germany, 2013.
14. Sheldrick, G. M. (2013a). The *SHELX* homepage, <http://shelx.uni-ac.gwdg.de/SHELX/>, 2013.
15. Sheldrick, G. M. *SHELXT*—Integrated Space-group and Crystal-structure Determination. *Acta Cryst. A* **2015**, *71*, 3-8.
16. Sheldrick, G. M. Crystal Structure Refinement with *SHELXL*. (2015b). *Acta Cryst. C* **2015**, *71*, 3-8.
17. Dolomanov, O. V.; Bourhis, L. J.; Gildea, R. J.; Howard, J. A. K.; Puschmann, H. *OLEX2*: a Complete Structure Solution, Refinement and Analysis Program. *J. Appl. Crystallogr.* **2009**, *42*, 339-341.
18. Guzei, I. A. Programs *Gn*. University of Wisconsin-Madison, Madison, Wisconsin, USA, 2007-2010.

## X. NMR Spectra.

### $^1\text{H}$ NMR for Compound 1a.

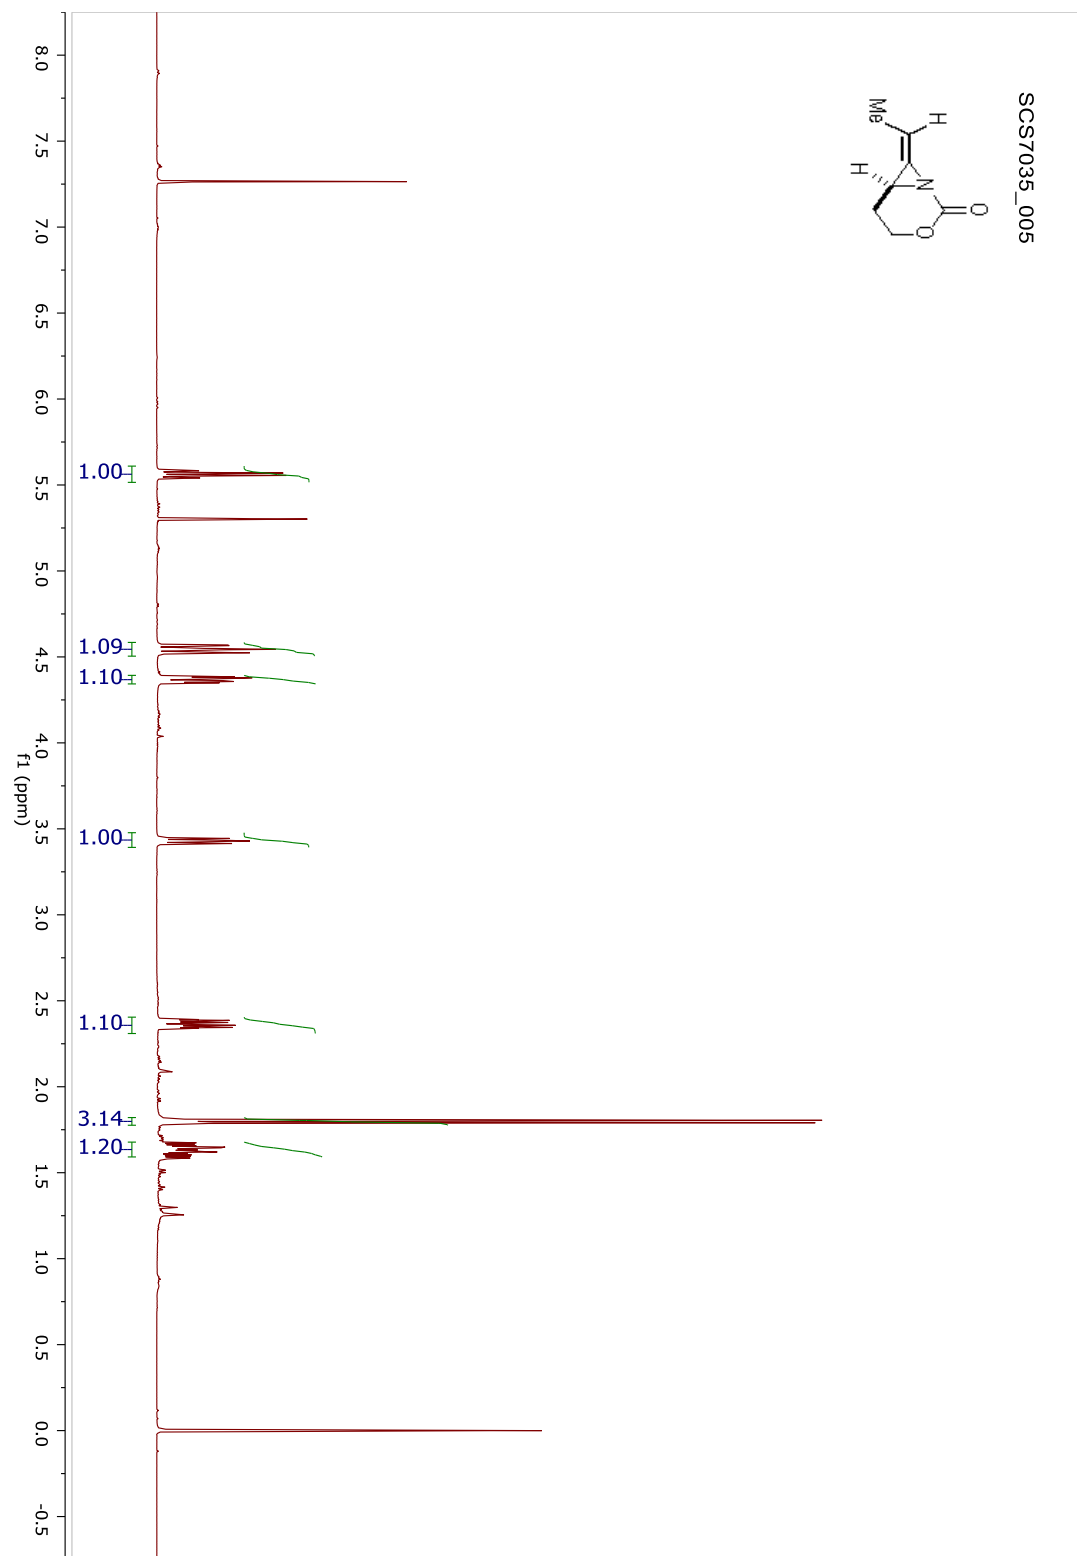

<sup>13</sup>C NMR for Compound 1a.

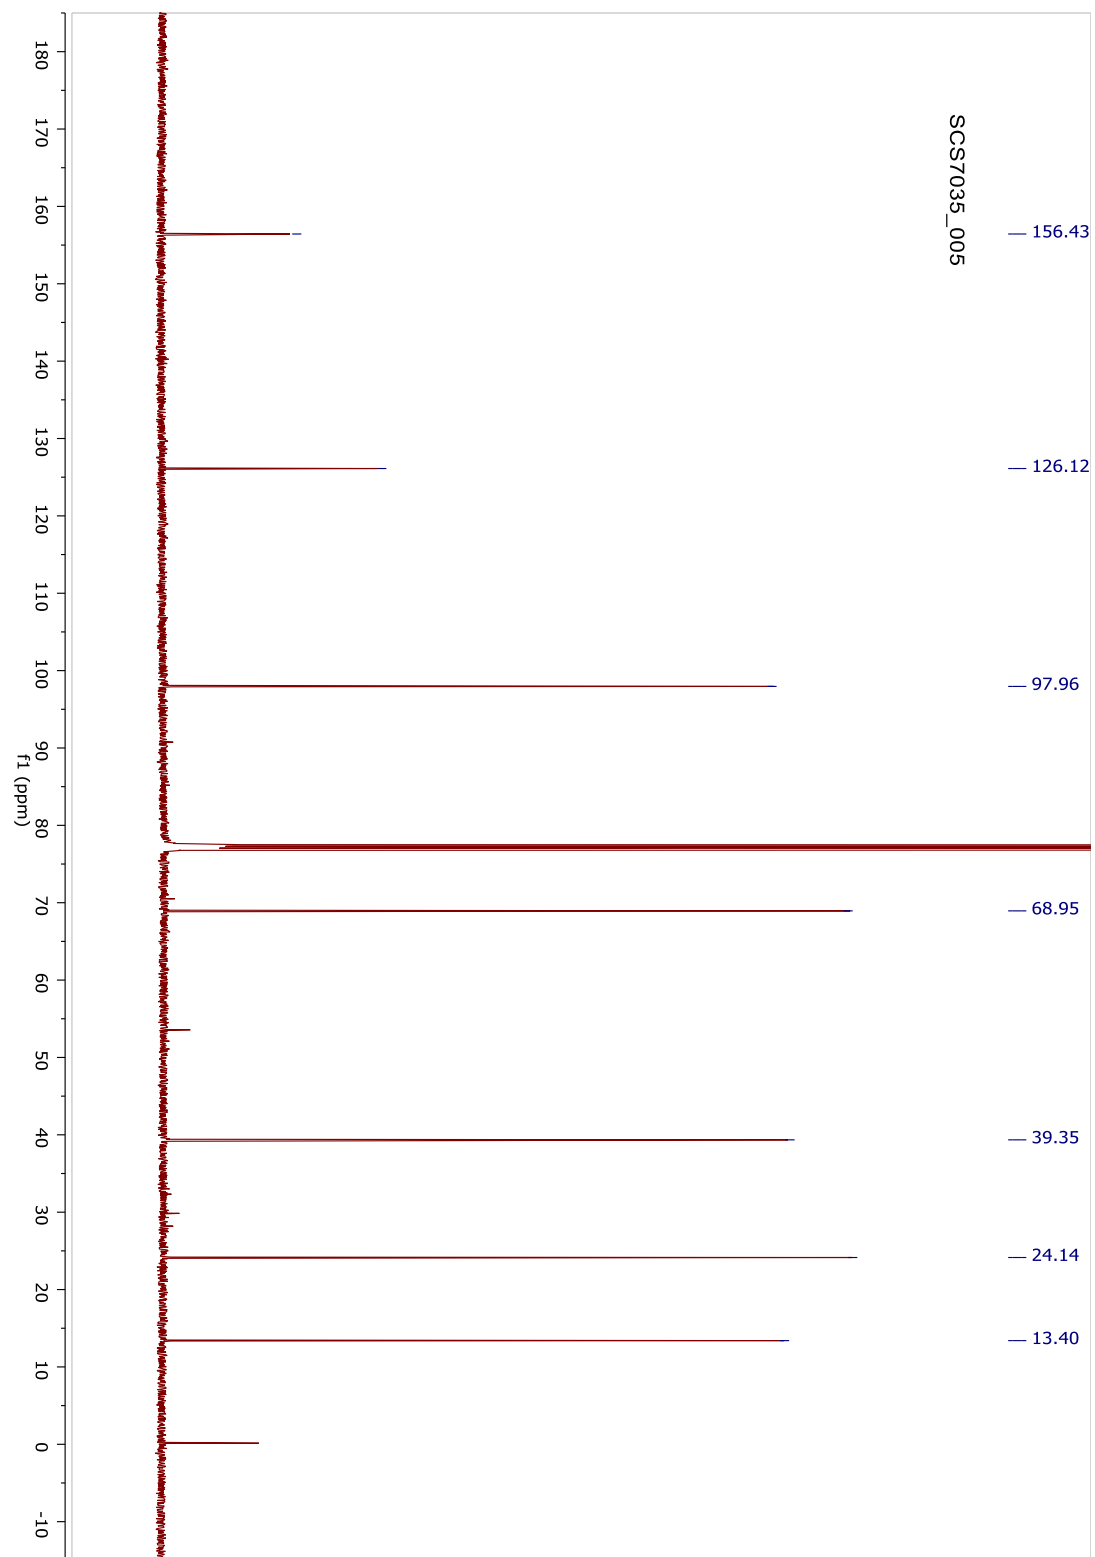



# <sup>1</sup>H NMR for Compound 1b.

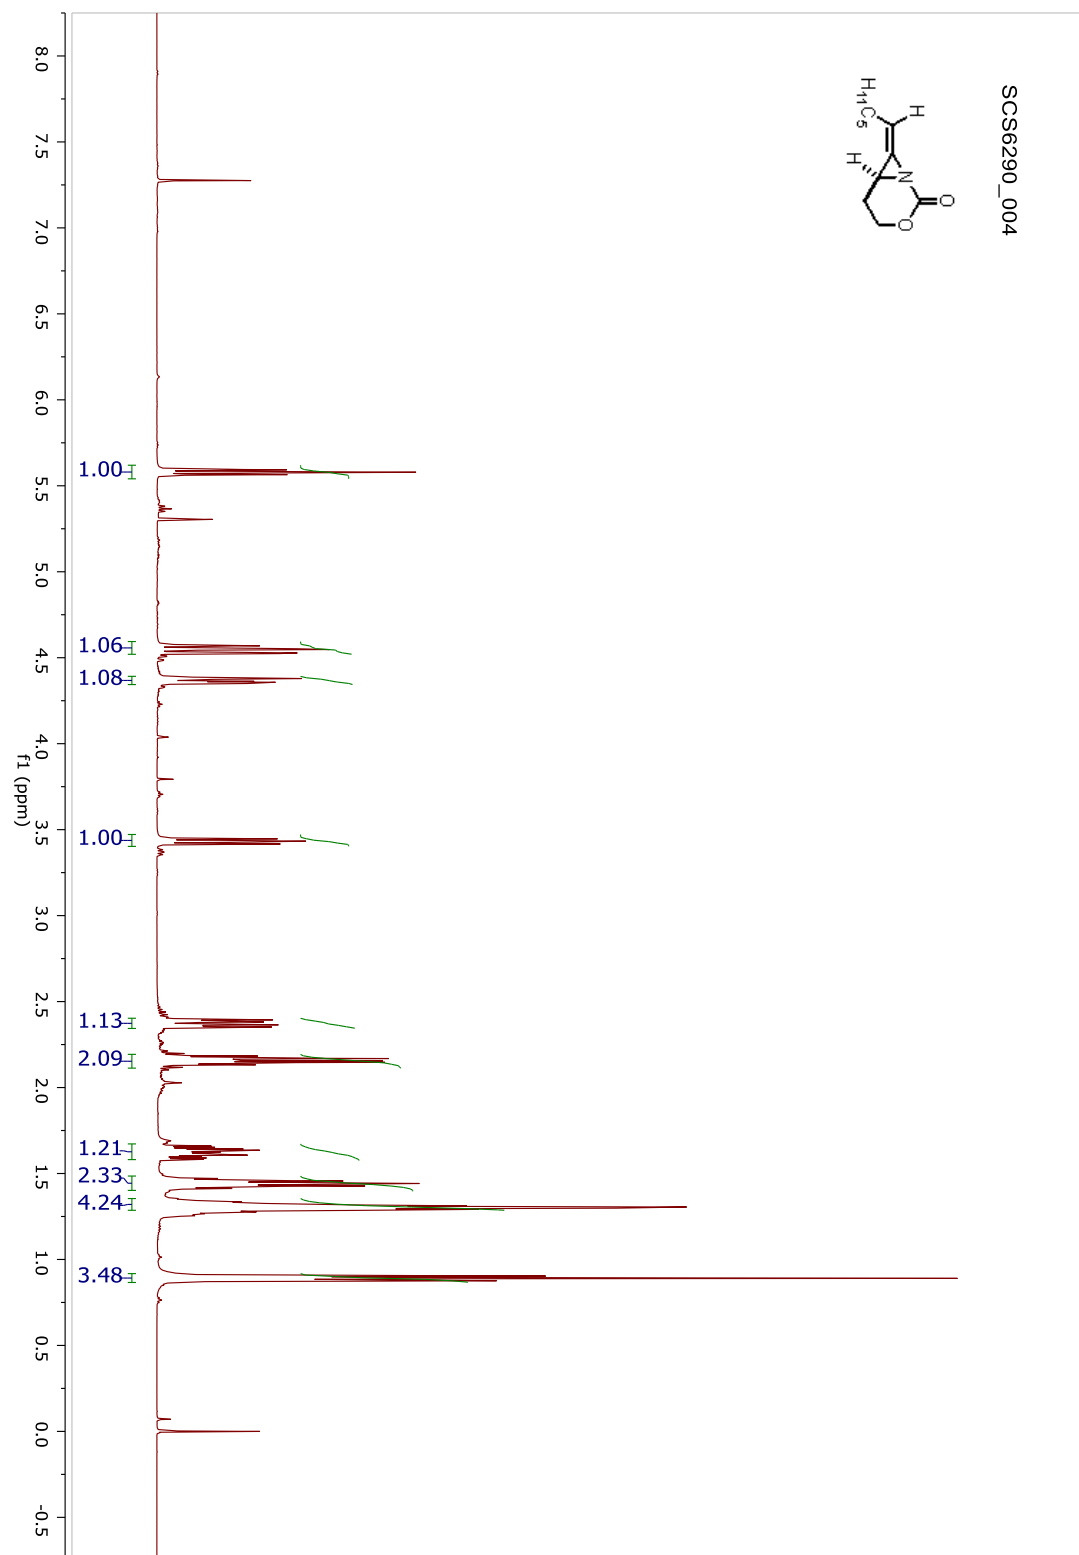

**$^{13}\text{C}$  NMR for Compound 1b.**

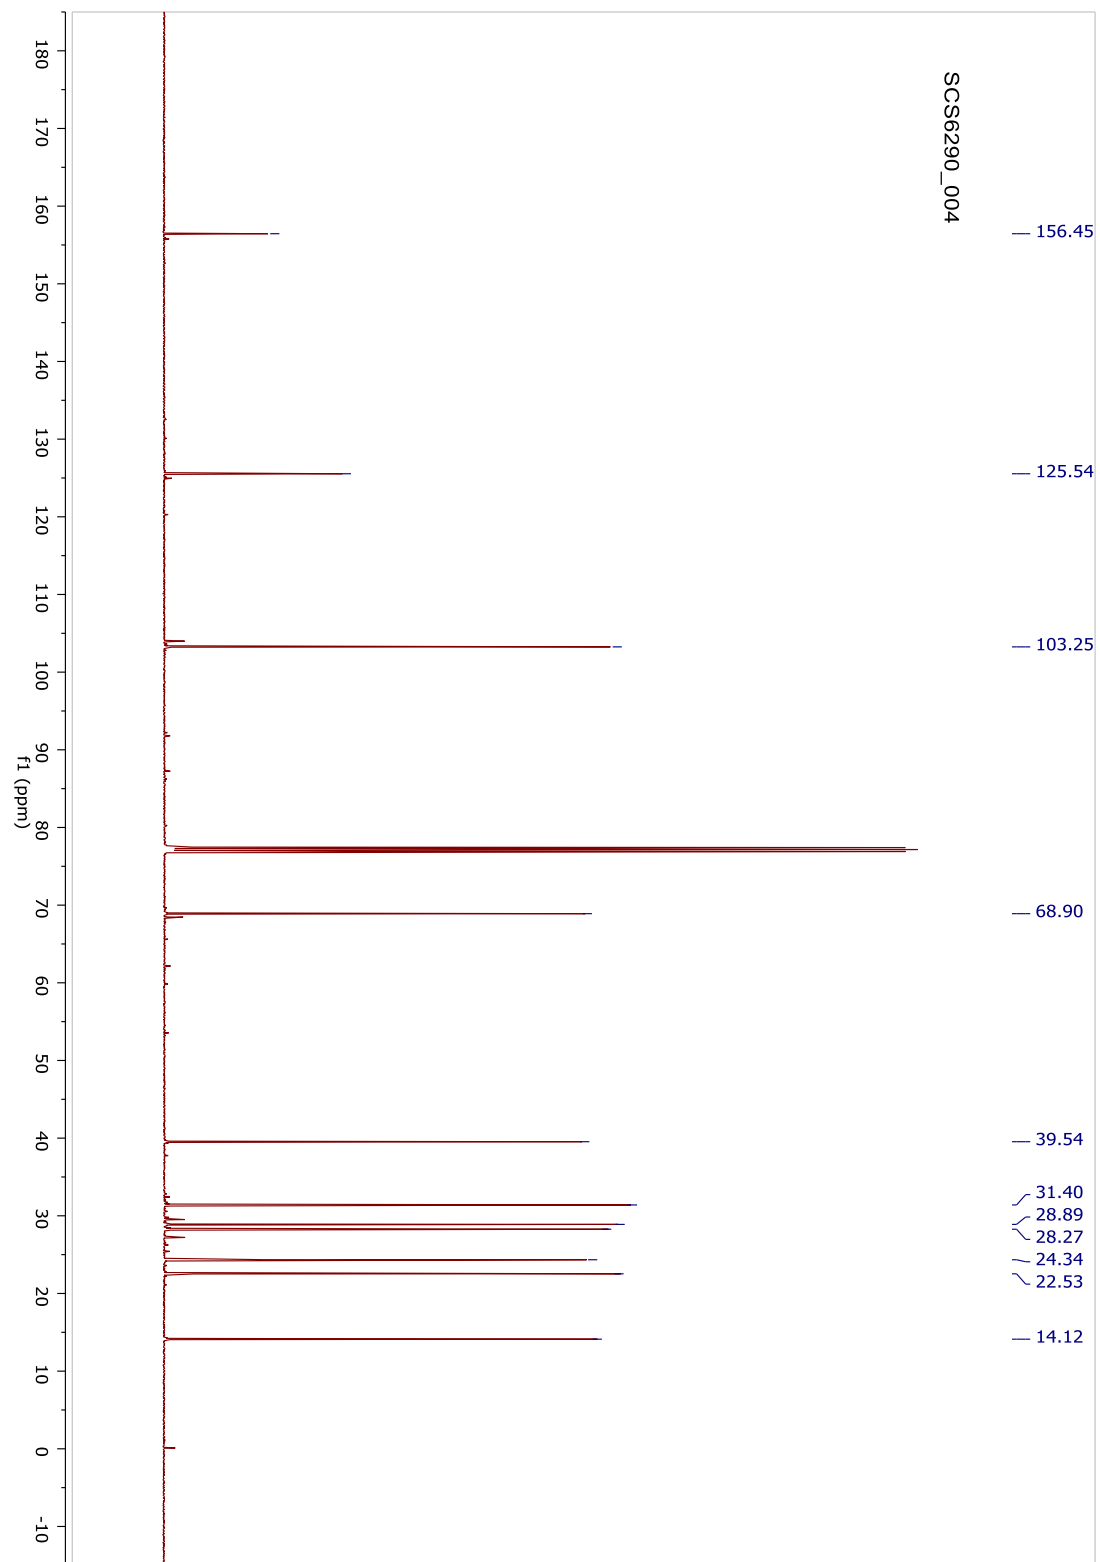

# <sup>1</sup>H NMR for Compound 3aa.

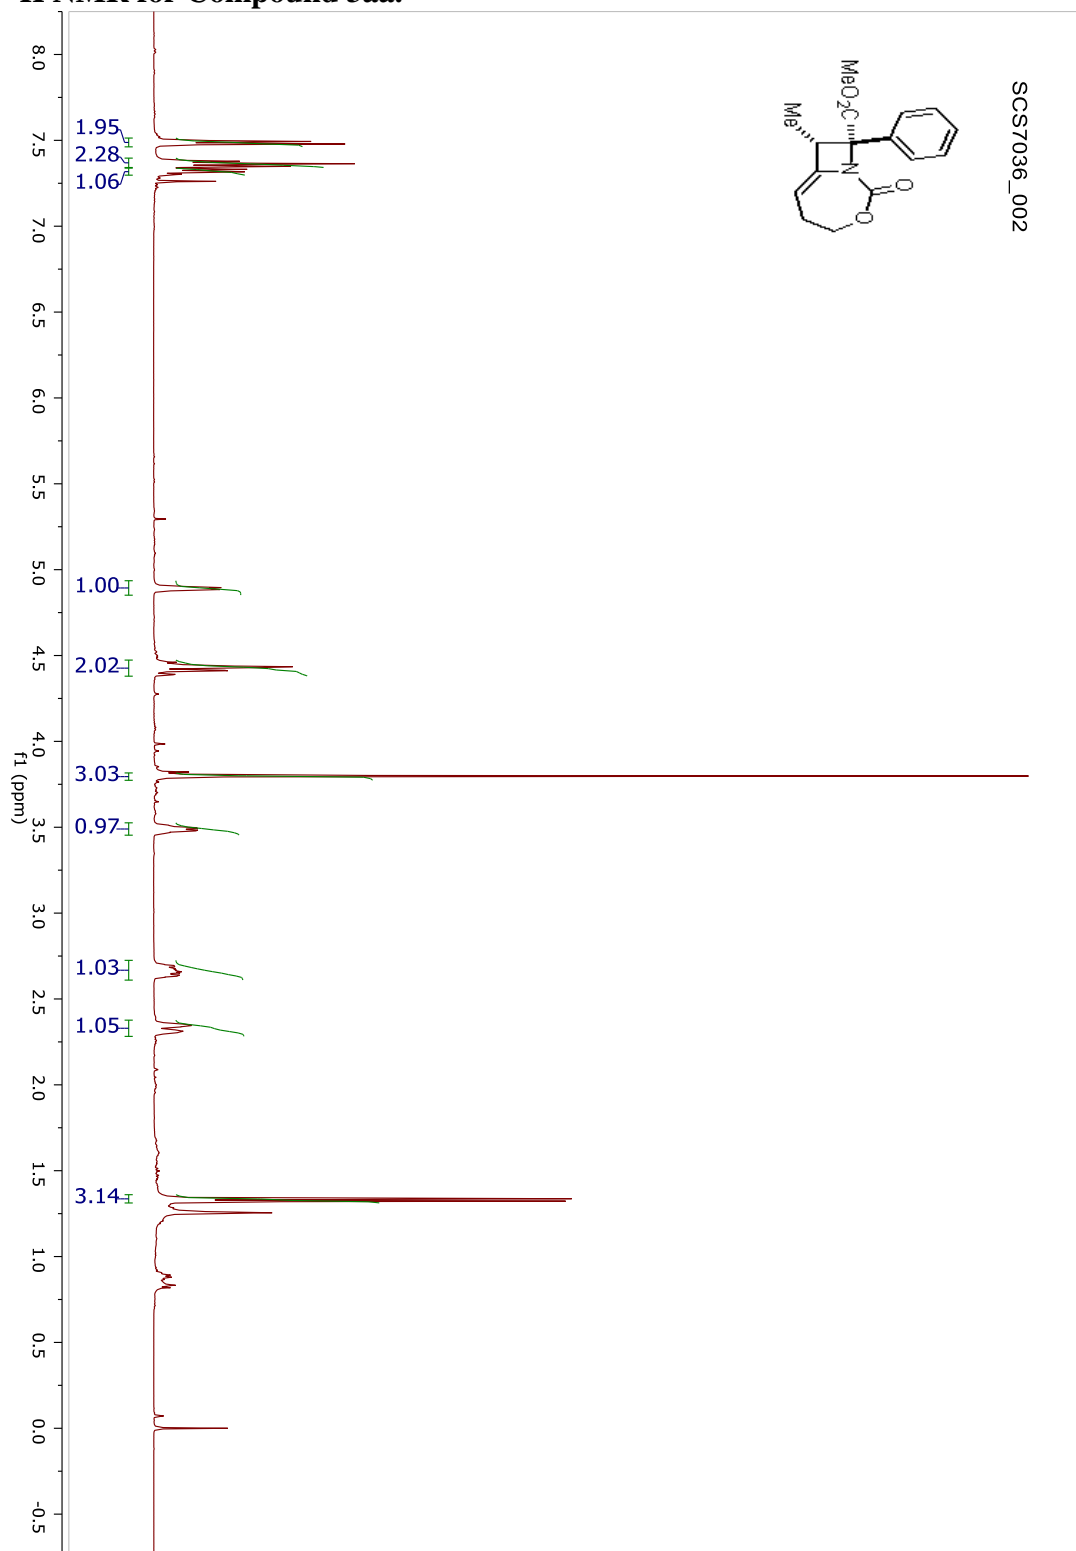

# <sup>13</sup>C NMR for Compound 3aa.

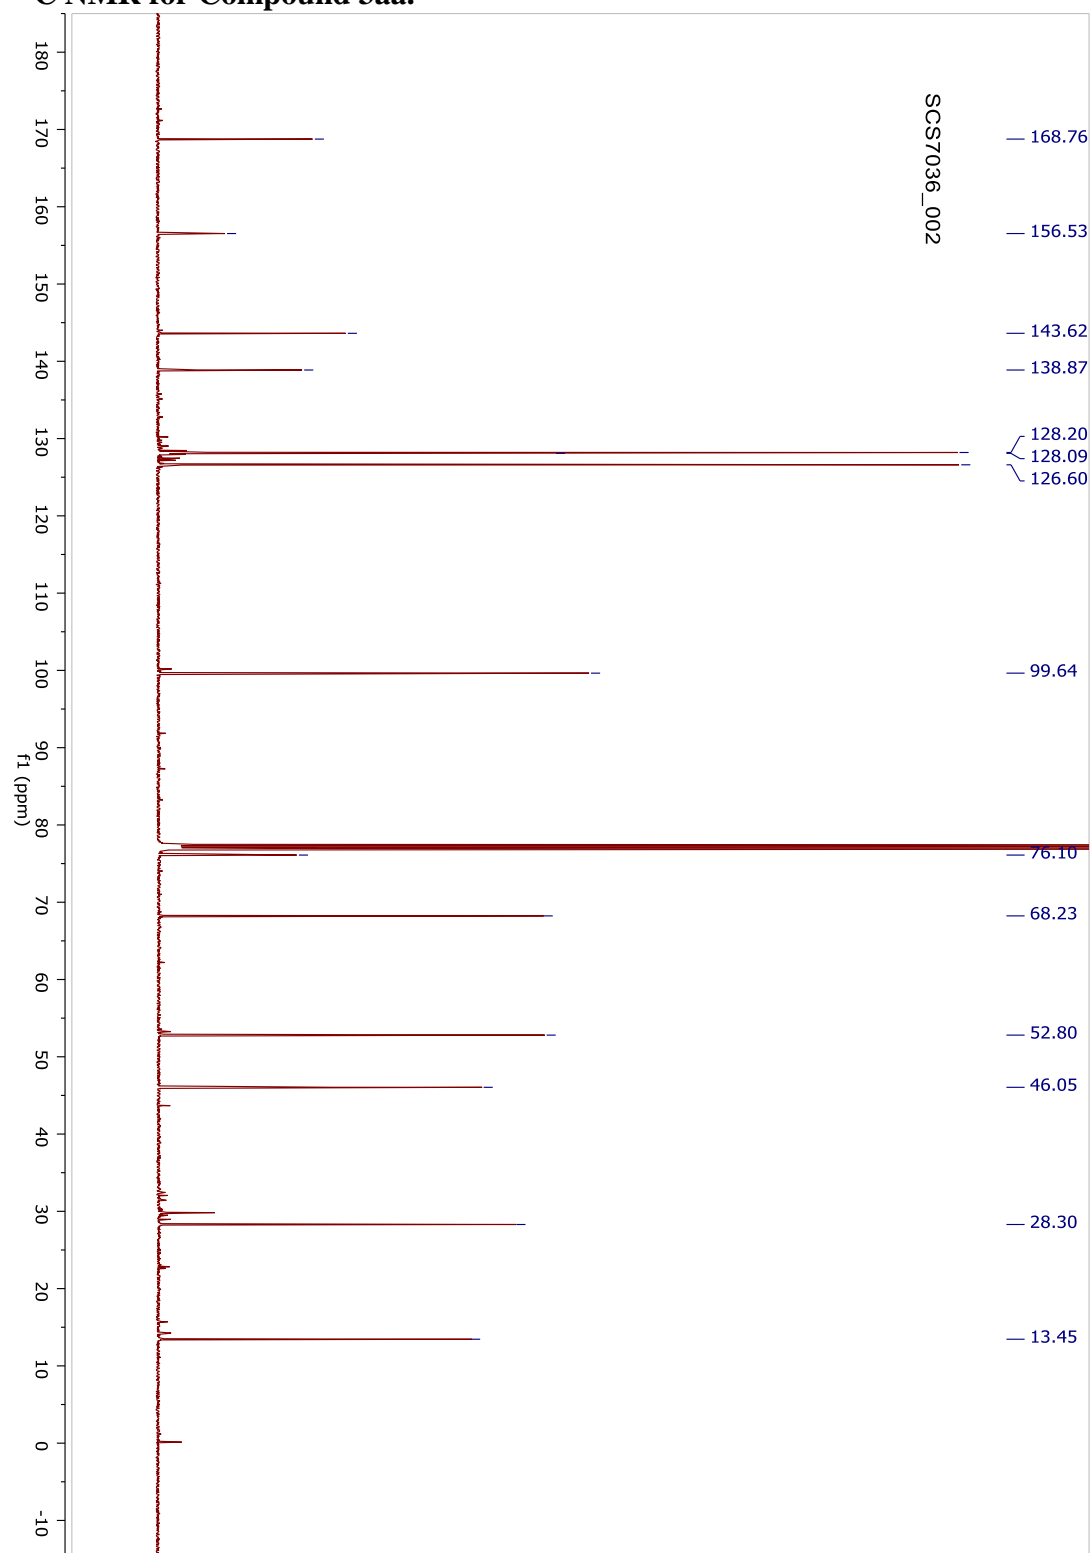

**<sup>1</sup>H NMR for Compound 3bb.**

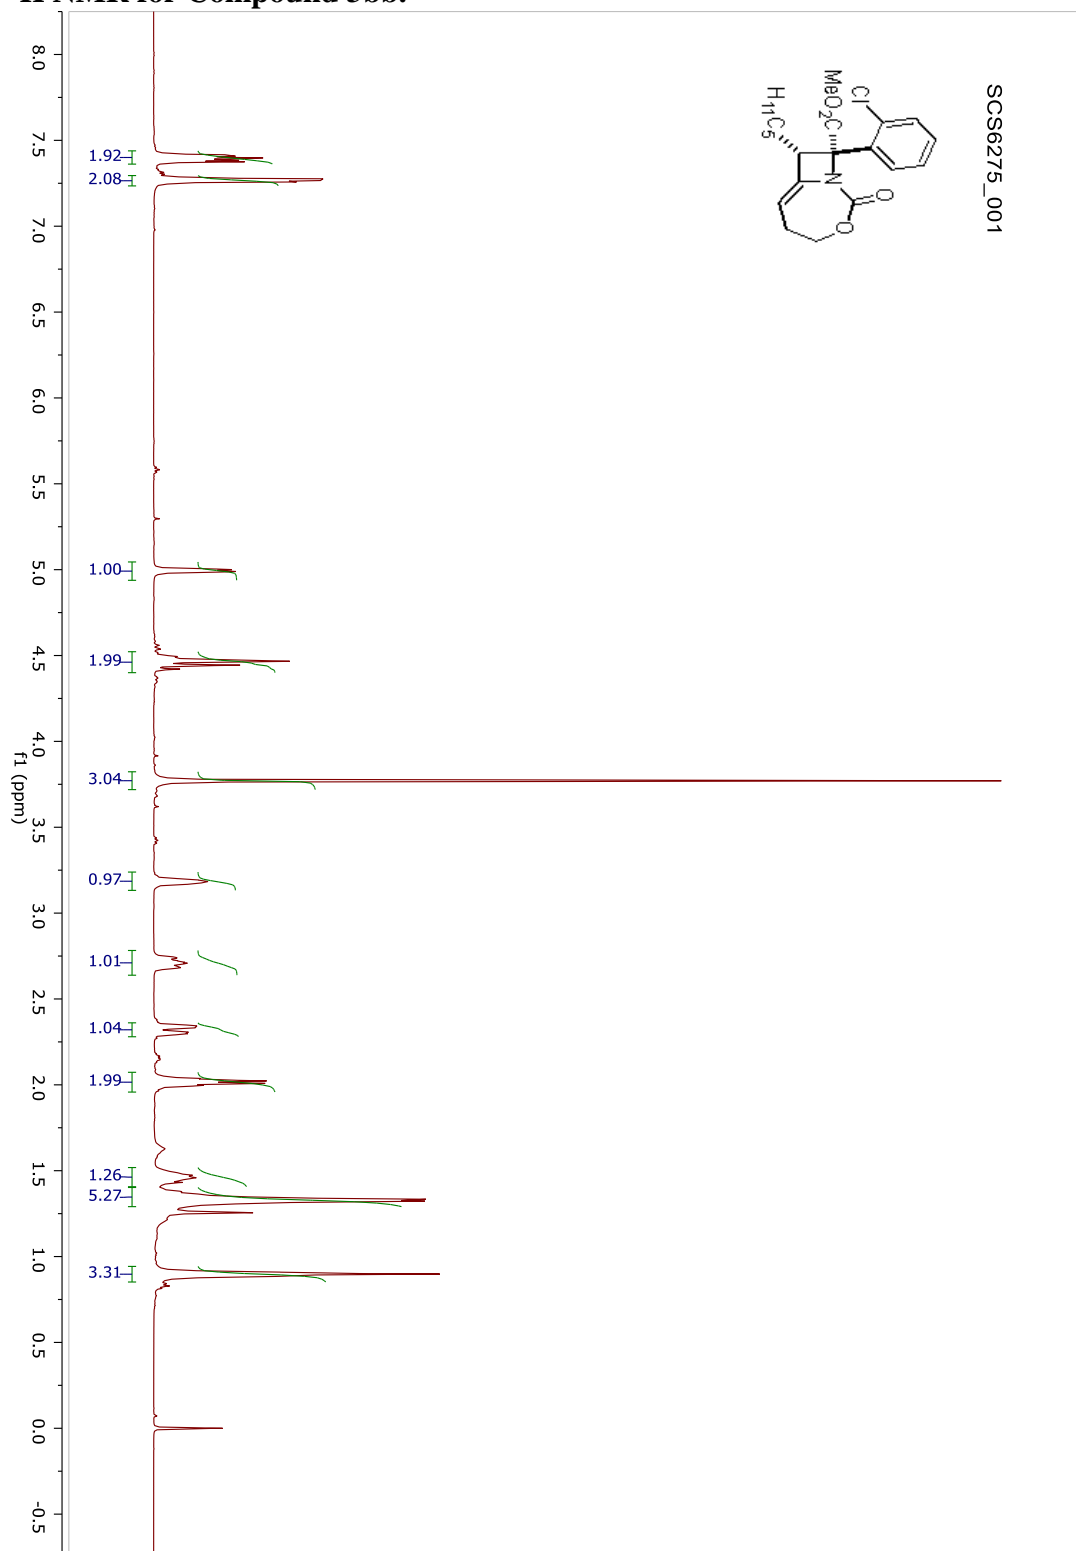

# <sup>13</sup>C NMR for Compound 3bb.

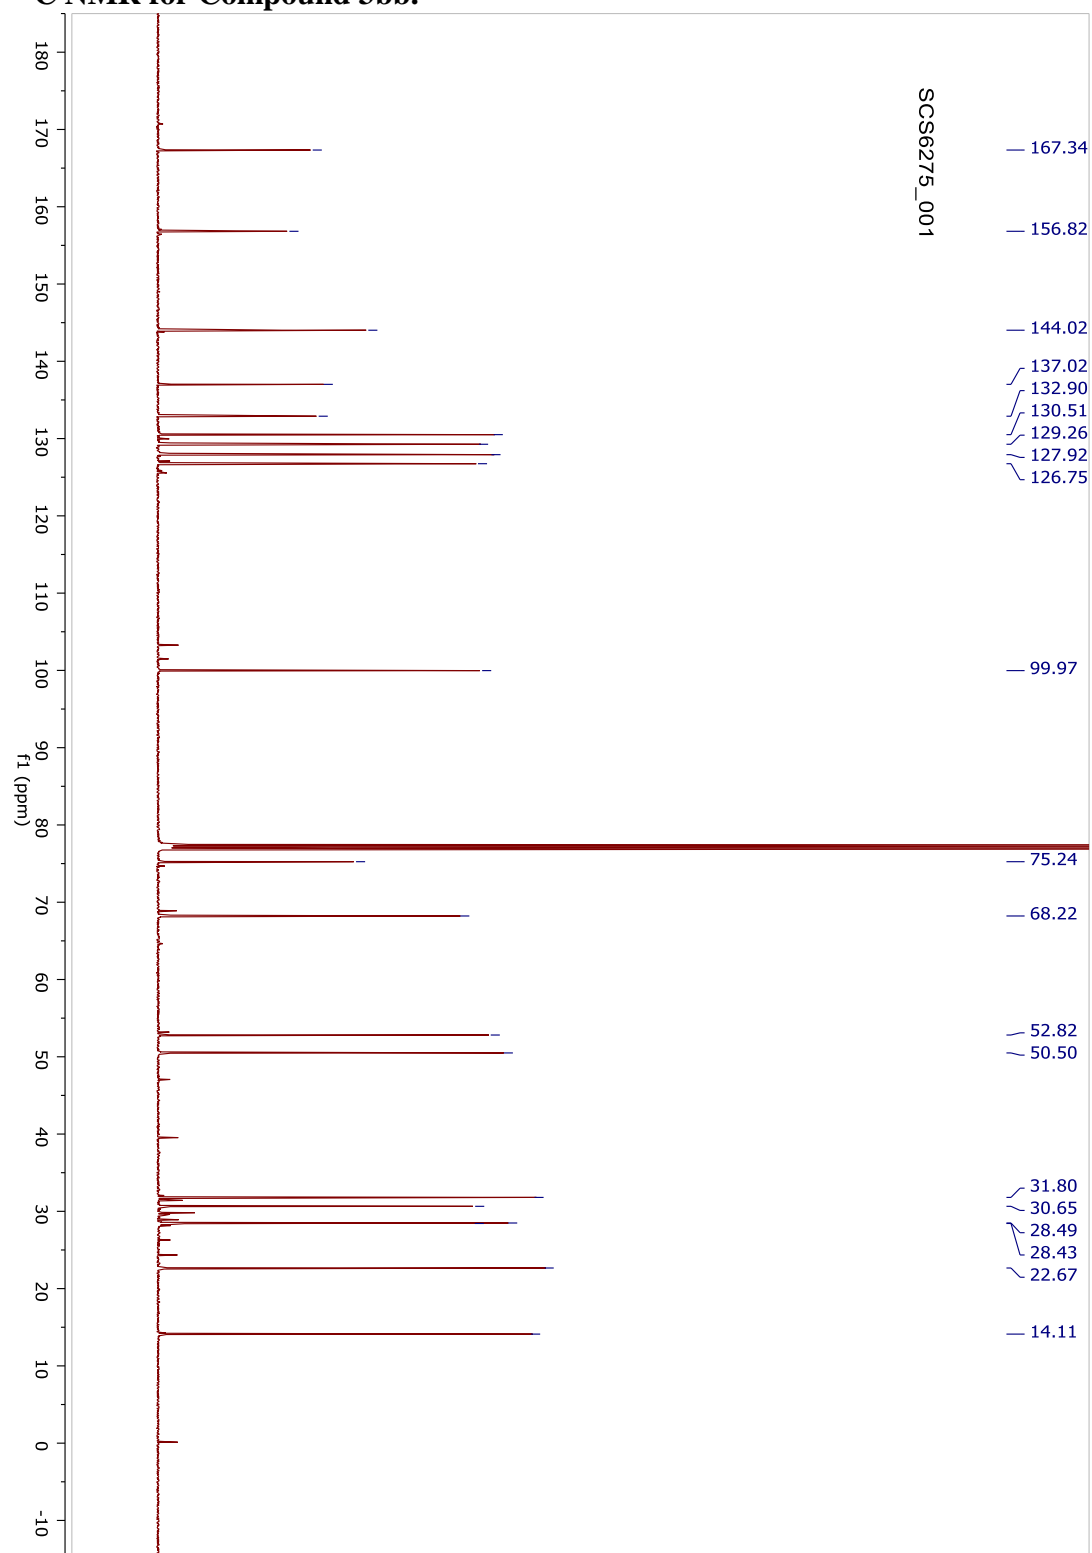

# <sup>1</sup>H NMR for Compound 3bc.

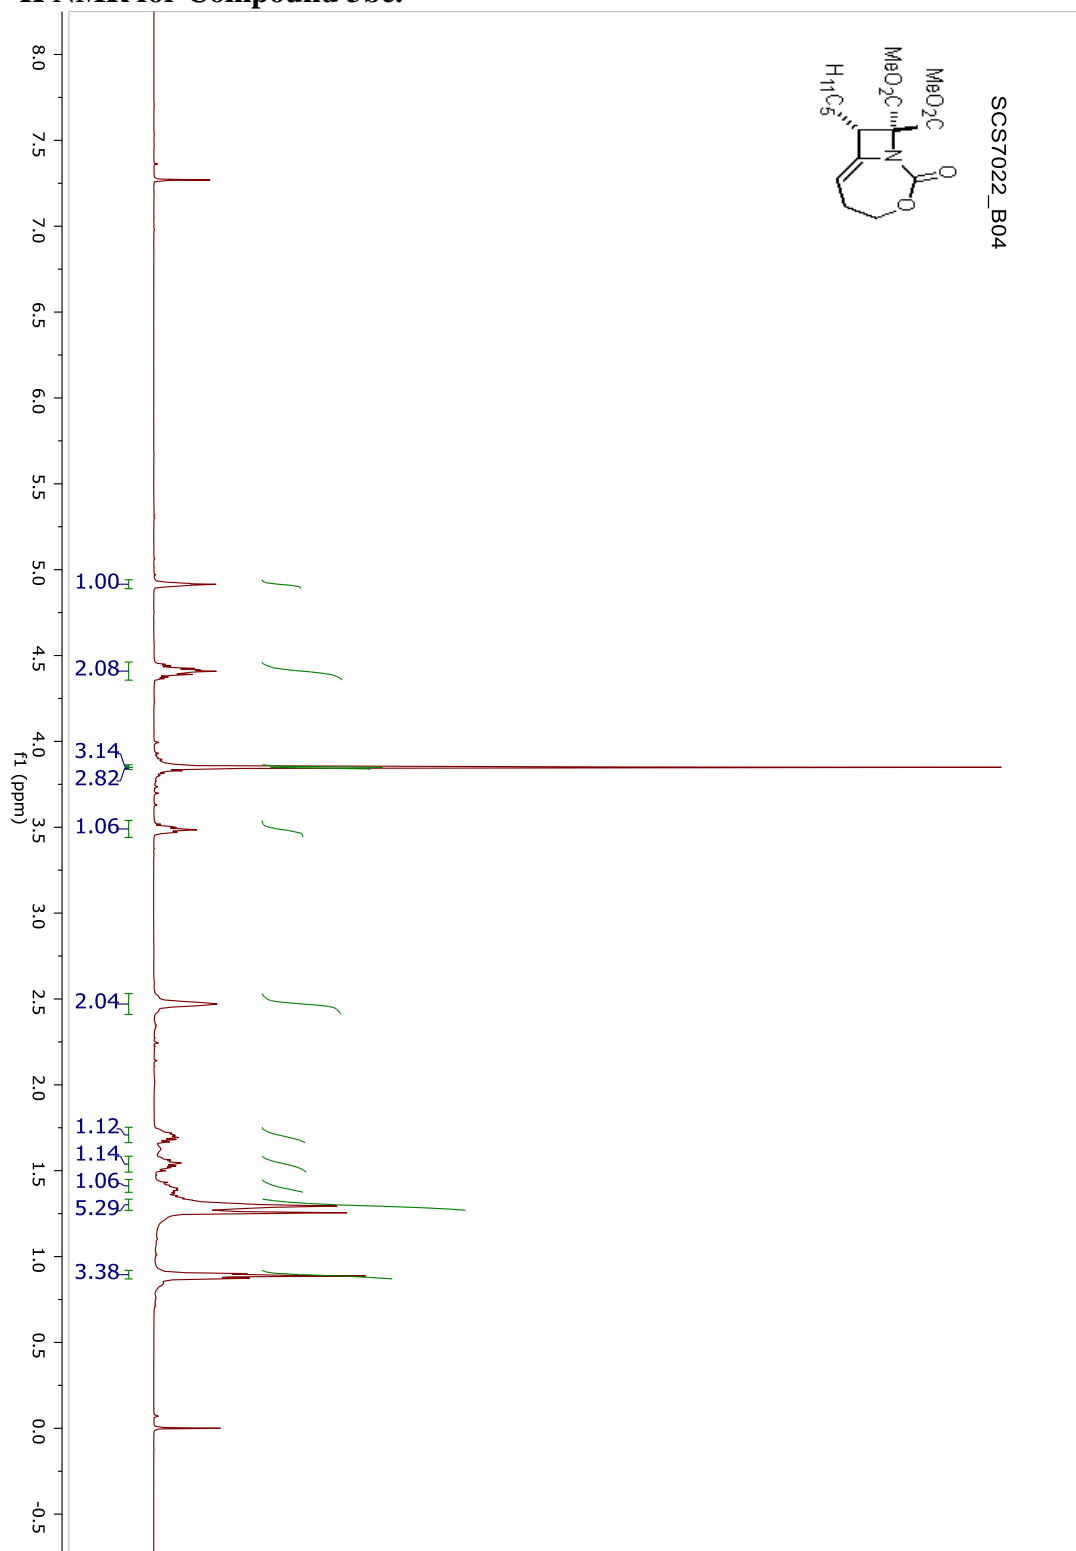

# <sup>13</sup>C NMR for Compound 3bc.

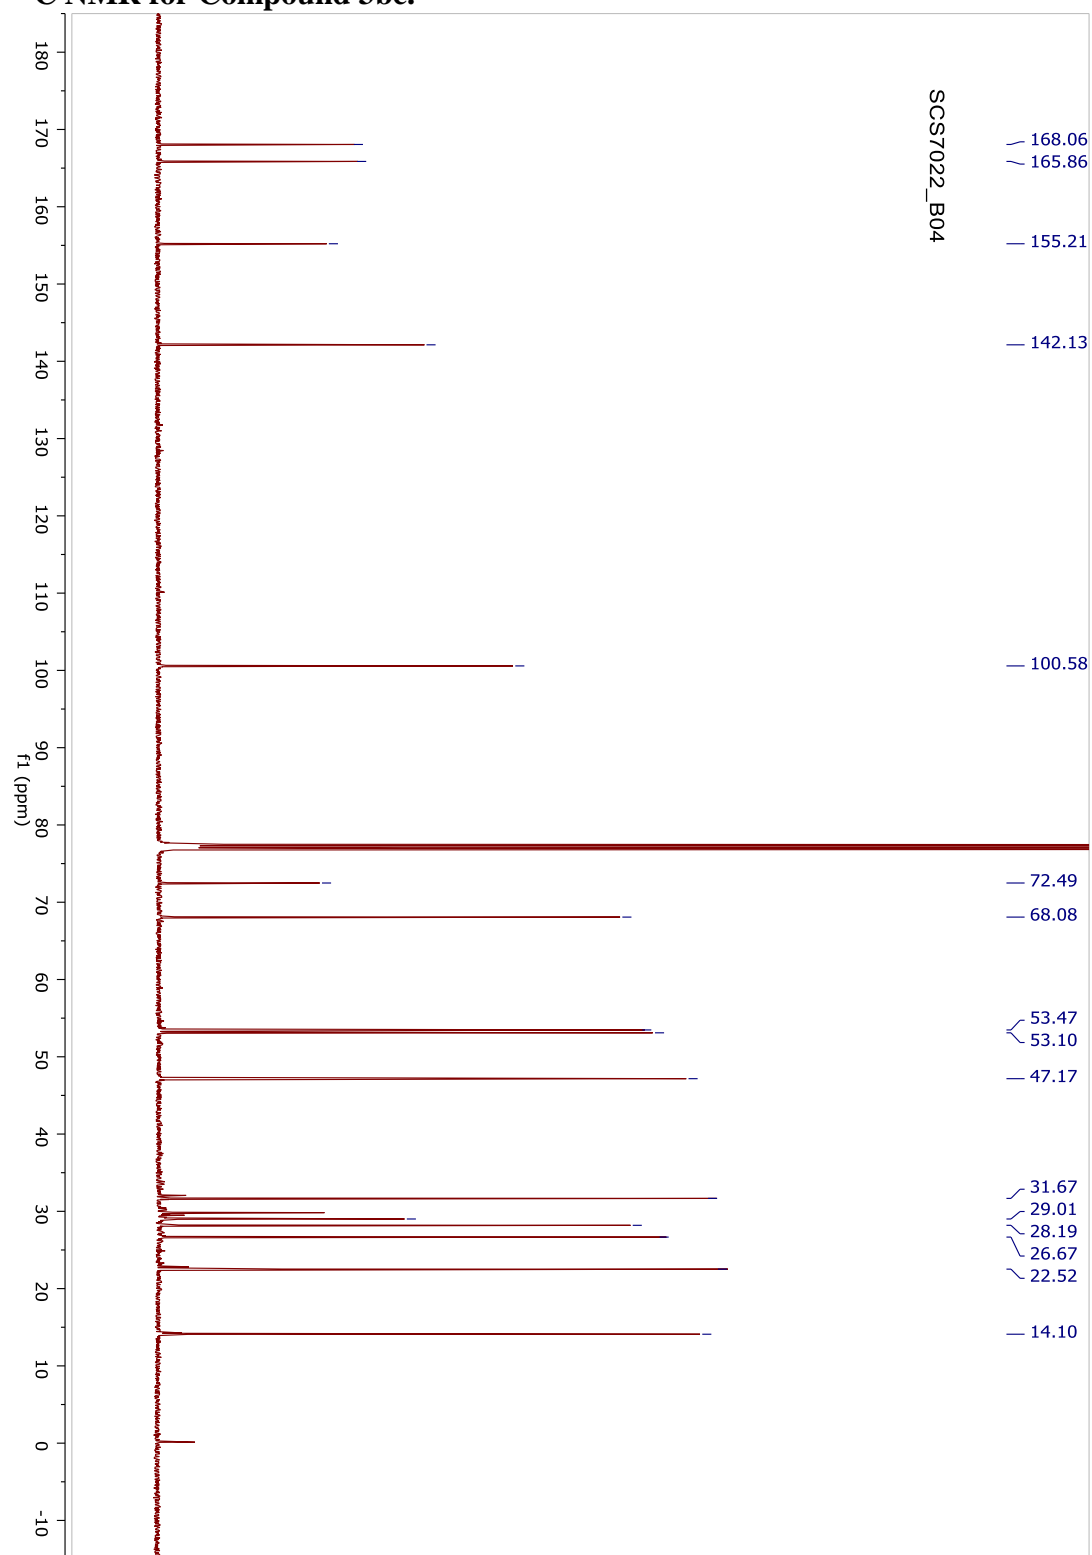



# <sup>1</sup>H NMR for Compound 3bd.

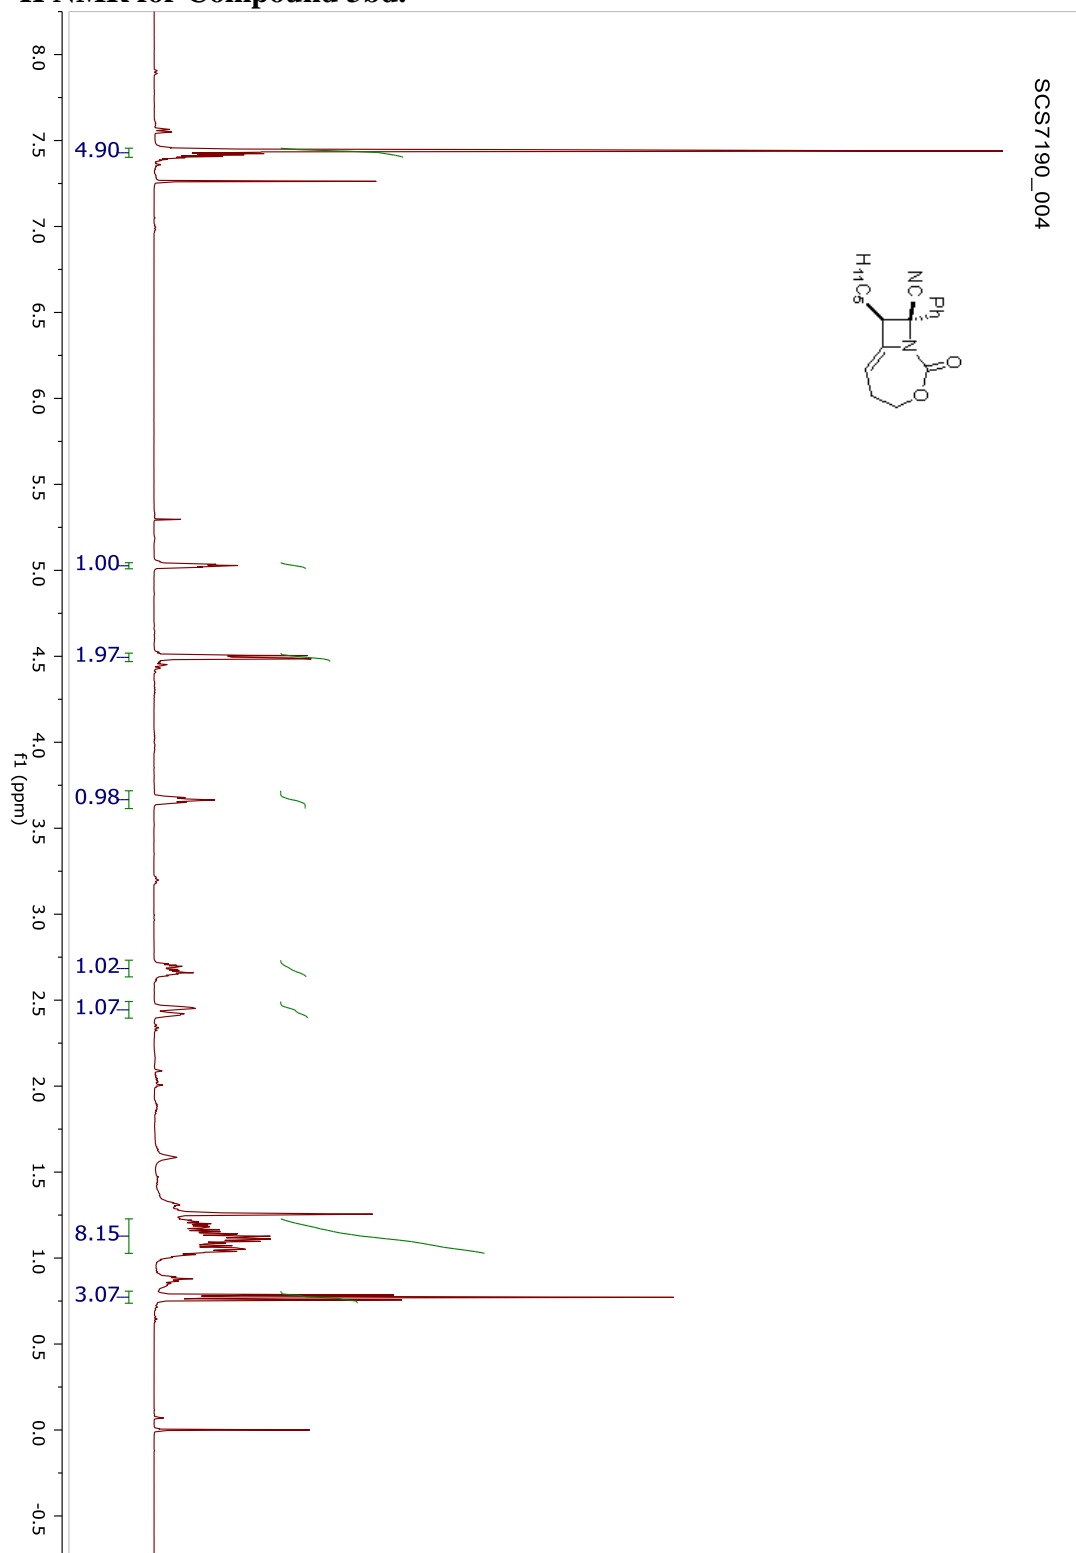

**$^{13}\text{C}$  NMR for Compound 3bd.**

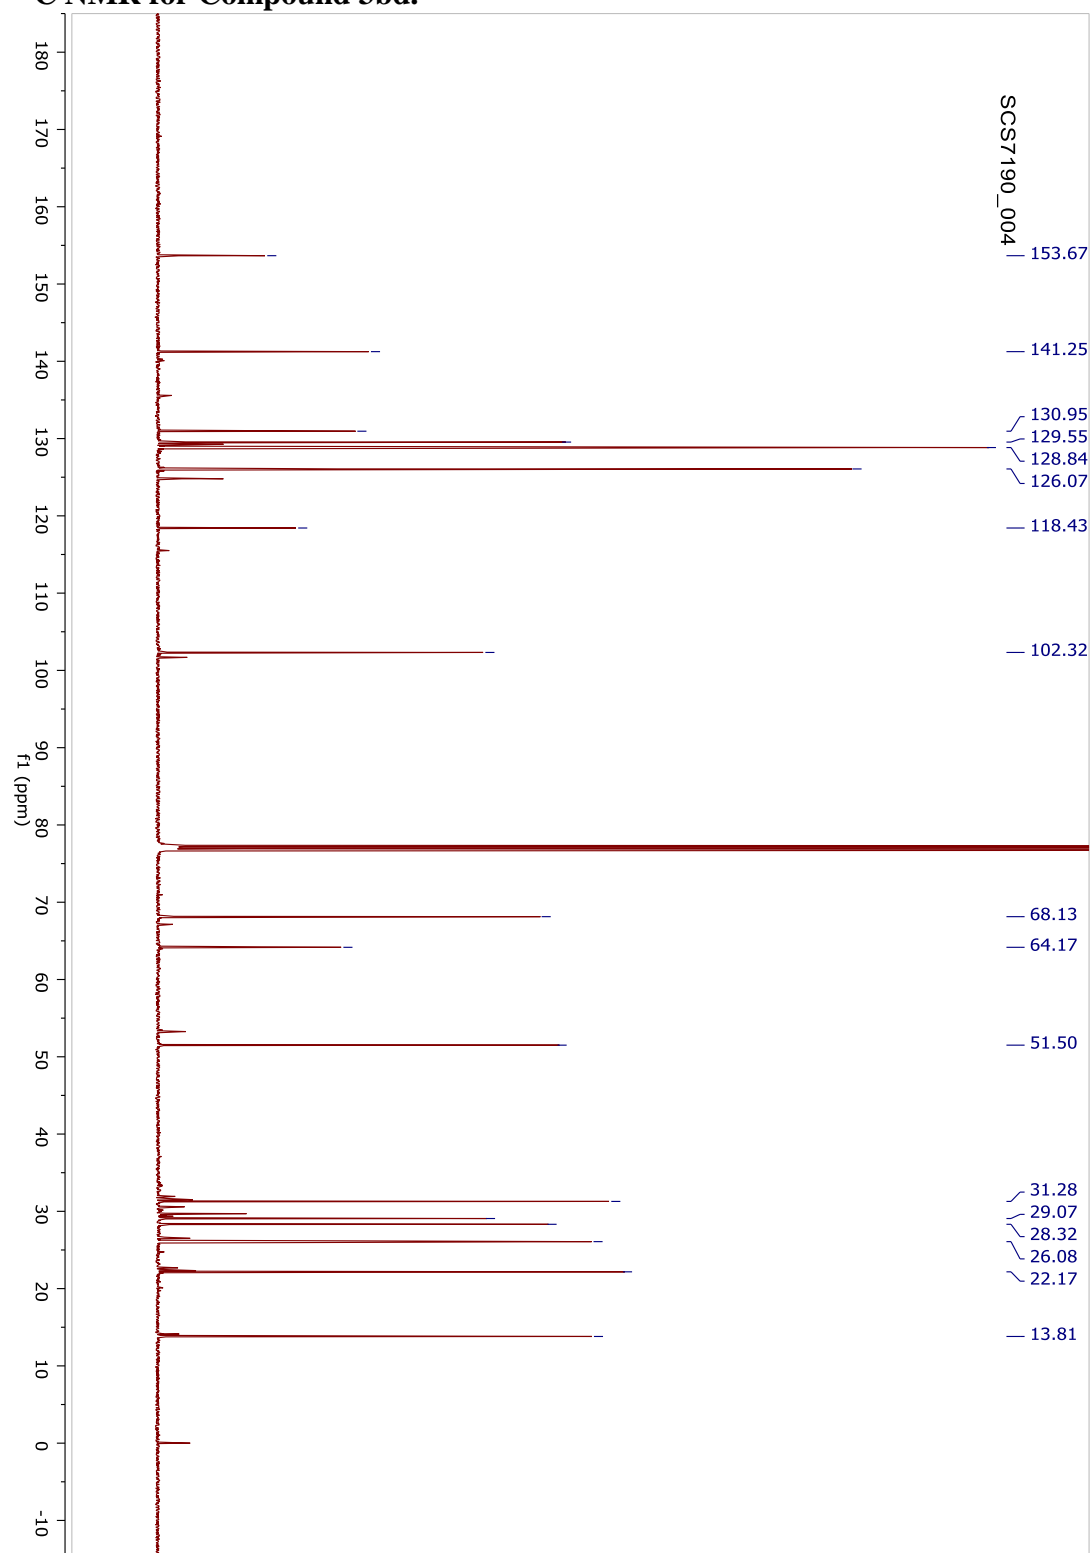

# <sup>1</sup>H NMR for Compound 5c.

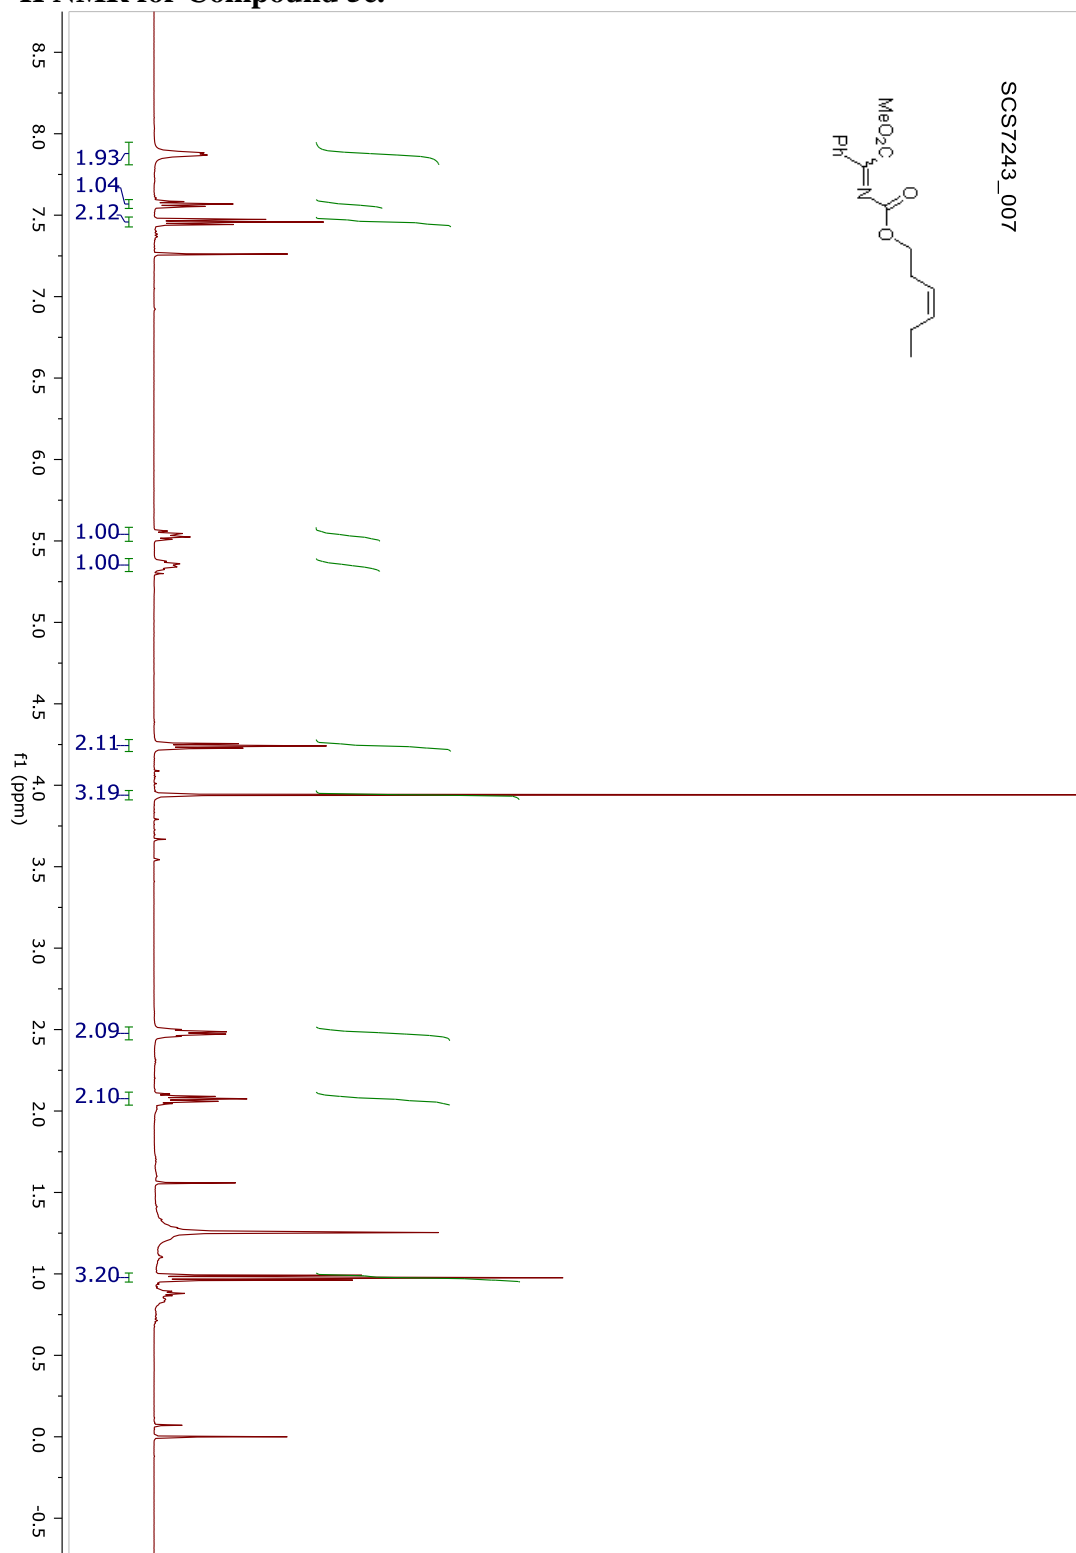

**$^{13}\text{C}$  NMR for Compound 5c.**

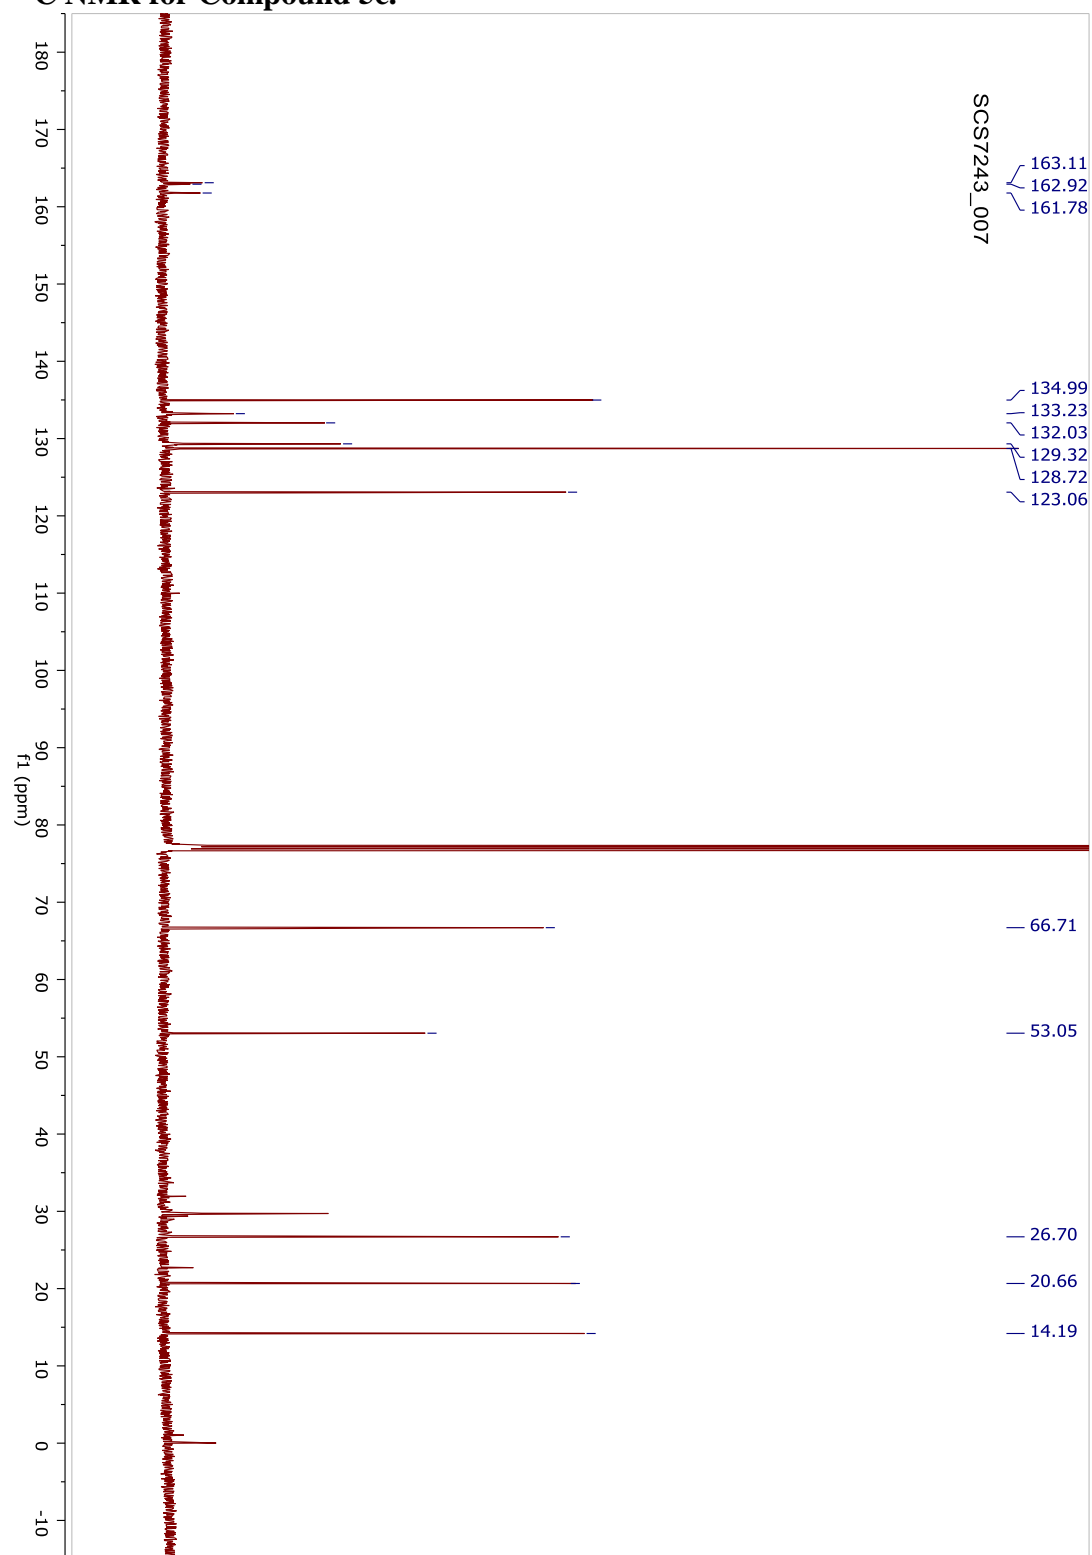

Supplement: NIHMS990155-supplement-SI.pdf [file NIHMS990155-supplement-SI.pdf]
